# Supplementary material for: Sevoflurane-induced POCD-associated exosomes delivered miR-584-5p regulates the growth of human microglia HMC3 cells through targeting BDNF
Source: Aging (Albany NY). 2022 Nov 30;14(24):9890–907. doi: 10.18632/aging.204398 (PMC9831737; doi:10.18632/aging.204398)
Supplement: Supplementary Table 1 [file aging-14-204398-s001.xlsx]

## Sheet: DE-miRNAs
Supplementary Table 1. All differentially expressed miRNAs (DE-miRNAs) between the sevoflurane-induced post operative cognitive dysfunction (POCD)-derived exosomes and non-POCD-derived exosomes were screened with the thresholds of |log2Fold Change (FC)| > 1.5 and P value < 0.05.
miRNA_id	BaseMean	BaseMean_control_Group_C	BaseMean_case_Group_T	FoldChange	log2FoldChange	pValue	qValue	Regulation	Expression_C1	Expression_C2	Expression_C3	Expression_T1	Expression_T2	Expression_T3	Sequence	Length
hsa-let-7a-3p	3.06423	0	6.12845	Inf	Inf	0.0101409	0.0358225	Up	0	0	0	0.268155	0.420744	1.1374	CTATACAATCTACTGTCTTTC	21
hsa-miR-100-5p	857.592	1261.89	453.291	0.359216	-1.47708	0.0298378	0.0882161	Down	124.65	125.607	74.2386	33.0724	50.4052	50.8579	AACCCGTAGATCCGAACTTGTG	22
hsa-miR-101-3p	2807.12	1454.99	4159.25	2.8586	1.51531	0.0123894	0.0409302	Up	140.771	138.272	92.1437	323.484	369.245	562.118	TACAGTACTGTGATAACTGAA	21
hsa-miR-10399-5p	7.08161	0	14.1632	Inf	Inf	0.00695019	0.0346341	Up	0	0	0	1.07262	1.17808	2.03107	AATTACAGATTGTCTCAGAGA	21
hsa-miR-106a-5p	7.78205	0	15.5641	Inf	Inf	0.00647244	0.0346341	Up	0	0	0	0.804464	1.09394	2.76225	AAAAGTGCTTACAGTGCAGGTAG	23
hsa-miR-106b-5p	40.651	0	81.3019	Inf	Inf	0.000270119	0.00565172	Up	0	0	0	4.46925	6.05872	13.8112	TAAAGTGCTGACAGTGCAGAT	21
hsa-miR-107	30.4303	0.9098	59.9508	65.8945	6.04209	0.011008	0.0375837	Up	0.0830997	0.173491	0	4.02232	10.7711	2.11231	AGCAGCATTGTACAGGGCTATCA	23
hsa-miR-11400	0.999081	0	1.99816	Inf	Inf	0.037604	0.105577	Up	0	0	0	0.17877	0.252447	0.162485	TCGGCTGTGTATCTCTGTGTC	21
hsa-miR-11401	16.5946	0	33.1893	Inf	Inf	0.00300674	0.0217124	Up	0	0	0	1.7877	2.52447	5.60574	TCACGTCTGCGGCTGTCACG	20
hsa-miR-1180-3p	72.3358	1.15496	143.517	124.261	6.95724	0.000111458	0.00358953	Up	0.0830997	0	0.168916	17.2513	14.4736	12.5926	TTTCCGGCTCGCGTGGGTGTGT	22
hsa-miR-122-5p	817121	1.50405e+06	130192	0.0865606	-3.53015	0.0221003	0.0677963	Down	95207.9	56950.7	188758	21775	18094.8	742.72	TGGAGTGTGACAATGGTGTTTG	22
hsa-miR-1228-5p	585.624	1137.98	33.2658	0.0292323	-5.09629	4.6022e-08	1.8777e-05	Down	92.0745	76.2492	106.333	10.1005	0.589042	1.46237	GTGGGCGGGGGCAGGTGTGTG	21
hsa-miR-1244	3.05699	0	6.11399	Inf	Inf	0.010097	0.0358225	Up	0	0	0	0.446925	0.504893	0.893669	AAGTAGTTGGTTTGTATGAGATGGTT	26
hsa-miR-126-5p	12.9478	0	25.8955	Inf	Inf	0.00409933	0.0267604	Up	0	0	0	1.43016	1.93542	4.3871	CATTATTACTTTTGGTACGCG	21
hsa-miR-1270	4.06331	0	8.12661	Inf	Inf	0.00944755	0.0348326	Up	0	0	0	0.446925	0.673191	1.29988	CTGGAGATATGGAAGAGCTGTGT	23
hsa-miR-1273h-5p	3.88497	0	7.76994	Inf	Inf	0.00943929	0.0348326	Up	0	0	0	0.35754	0.504893	1.46237	CTGGGAGGTCAAGGCTGCAGT	21
hsa-miR-1285-3p	6.0694	0.435439	11.7034	26.8772	4.74831	0.023435	0.0713542	Up	0	0	0.0844581	0.71508	0.925638	1.86858	TCTGGGCAACAAAGTGAGACCT	22
hsa-miR-129-5p	2.26771	0	4.53541	Inf	Inf	0.0122272	0.0405587	Up	0	0	0	0.35754	0.504893	0.487456	CTTTTTGCGGTCTGGGCTTGC	21
hsa-miR-1294	24.216	0.435439	47.9966	110.226	6.78432	0.00394259	0.0265647	Up	0	0	0.0844581	2.9497	3.53425	7.96178	TGTGAGGTTGGCATTGTTGTCT	22
hsa-miR-1301-3p	5.26902	0	10.538	Inf	Inf	0.00829589	0.0346341	Up	0	0	0	0.625695	0.75734	1.78734	TTGCAGCTGCCTGGGAGTGACTTC	24
hsa-miR-1307-3p	52.7171	2.06476	103.369	50.0637	5.64569	0.00194505	0.0172518	Up	0.166199	0.173491	0.168916	21.0948	4.45989	9.42414	ACTCGGCGTGGCGTCGGTCGTG	22
hsa-miR-1307-5p	14.8273	0	29.6547	Inf	Inf	0.00347297	0.0237571	Up	0	0	0	1.60893	2.01957	5.28077	TCGACCGGACCTCGACCGGCT	21
hsa-miR-130a-3p	3.07865	0.31286	5.84444	18.6807	4.22348	0.0378406	0.105746	Up	0	0.0867454	0	0.446925	0.504893	0.812426	CAGTGCAATGTTAAAAGGGCAT	22
hsa-miR-132-5p	4.7735	0	9.547	Inf	Inf	0.00880683	0.0348326	Up	0	0	0	0.71508	0.925638	1.21864	ACCGTGGCTTTCGATTGTTACT	22
hsa-miR-134-5p	20.8929	41.7858	0	0	#NAME?	0.00109815	0.0139767	Down	5.81698	6.07218	0	0	0	0	TGTGACTGGTTGACCAGAGGGG	22
hsa-miR-139-3p	902.831	1365.99	439.671	0.32187	-1.63545	0.0414929	0.115557	Down	119.83	114.851	105.15	136.58	12.7906	10.9678	TGGAGACGCGGCCCTGTTGGAGT	23
hsa-miR-140-3p	207.043	82.3123	331.773	4.03067	2.01102	0.0322587	0.0946874	Up	5.15218	3.20958	10.3039	29.6758	29.0314	42.3274	TACCACAGGGTAGAACCACGG	21
hsa-miR-142-5p	154.054	0	308.109	Inf	Inf	3.01483e-09	2.4601e-06	Up	0	0	0	17.6088	23.5617	51.1016	CATAAAGTAGAAAGCACTACT	21
hsa-miR-144-3p	737.086	223.692	1250.48	5.59018	2.48289	0.00150003	0.0152921	Up	22.1045	24.2887	11.7397	80.4464	116.967	174.997	TACAGTATAGATGATGTACT	20
hsa-miR-144-5p	85.3323	1.03238	169.632	164.312	7.36029	3.38067e-05	0.00197045	Up	0.0830997	0.0867454	0.0844581	8.3128	16.8298	24.6165	GGATATCATCATATACTGTAAG	22
hsa-miR-145-3p	73.1871	145.478	0.895764	0.00615737	-7.34347	5.28799e-05	0.00256968	Down	15.2073	14.5732	7.93906	0.0893849	0.168298	0	GGATTCCTGGAAATACTGTTCT	22
hsa-miR-15a-5p	6.74744	0	13.4949	Inf	Inf	0.00733798	0.0346341	Up	0	0	0	0.893849	1.26223	1.86858	TAGCAGCACATAATGGTTTGTG	22
hsa-miR-15b-3p	4.32074	0	8.64148	Inf	Inf	0.00909838	0.0348326	Up	0	0	0	0.35754	0.589042	1.62485	CGAATCATTATTTGCTGCTCTA	22
hsa-miR-15b-5p	5.44013	0	10.8803	Inf	Inf	0.00826475	0.0346341	Up	0	0	0	0.893849	1.00979	1.38112	TAGCAGCACATCATGGTTTACA	22
hsa-miR-17-5p	27.5223	0.31286	54.7317	174.94	7.45072	0.00309467	0.0221513	Up	0	0.0867454	0	2.50278	7.2368	5.93071	CAAAGTGCTTACAGTGCAGGTAG	23
hsa-miR-181a-3p	46.77	93.5399	0	0	#NAME?	0.000318362	0.00649459	Down	5.06908	3.38307	12.4153	0	0	0	ACCATCGACCGTTGATTGTACC	22
hsa-miR-1827	1.68505	0	3.3701	Inf	Inf	0.0153251	0.0488487	Up	0	0	0	0.268155	0.336596	0.406213	TGAGGCAGTAGATTGAAT	18
hsa-miR-1843	64.6175	0	129.235	Inf	Inf	1.82149e-05	0.00157615	Up	0	0	0	6.88264	13.8846	17.0609	TATGGAGGTCTCTGTCTGGC	20
hsa-miR-185-3p	3.40156	0	6.80312	Inf	Inf	0.0102116	0.0358676	Up	0	0	0	0.53631	0.75734	0.731183	AGGGGCTGGCTTTCCTCTGGTC	22
hsa-miR-185-5p	478.157	127.645	828.669	6.492	2.69866	0.00184566	0.0167339	Up	14.127	16.5684	3.80061	76.3347	61.2604	117.396	TGGAGAGAAAGGCAGTTCCTGA	22
hsa-miR-186-5p	347.12	55.8857	638.353	11.4225	3.51381	0.000251703	0.00540498	Up	6.31558	6.85289	1.85808	42.3685	54.1919	94.8914	CAAAGAATTCTCCTTTTGGGCT	22
hsa-miR-18a-3p	4.33285	0	8.6657	Inf	Inf	0.00913202	0.0348326	Up	0	0	0	0.446925	0.673191	1.46237	ACTGCCCTAAGTGCTCCTTCTGG	23
hsa-miR-1908-5p	17.9521	0	35.9042	Inf	Inf	0.00265876	0.0202761	Up	0	0	0	2.32401	2.86106	5.60574	CGGCGGGGACGGCGATTGGTC	21
hsa-miR-193a-5p	236.587	454.139	19.0344	0.0419132	-4.57645	3.0596e-05	0.00197045	Down	51.2725	49.7919	19.2564	5.98879	0.0841489	0.974911	TGGGTCTTTGCGGGCGAGATGA	22
hsa-miR-193b-5p	793.827	1497.06	90.593	0.0605139	-4.04659	7.79968e-07	0.000212151	Down	126.976	106.87	131.417	19.6647	9.25638	0.974911	CGGGGTTTTGAGGGCGAGATGA	22
hsa-miR-195-3p	32.154	64.308	0	0	#NAME?	0.000342432	0.00681523	Down	8.89167	9.28176	0.0844581	0	0	0	CCAATATTGGCTGTGCTGCTCC	22
hsa-miR-200a-3p	6.06445	0.59694	11.532	19.3185	4.27191	0.0476775	0.130553	Up	0.0830997	0.0867454	0	0.446925	1.26223	1.62485	TAACACTGTCTGGTAACGATGT	22
hsa-miR-203a-3p	1196.78	138.425	2255.14	16.2914	4.02604	9.02997e-06	0.00105264	Up	12.3819	20.1249	4.56073	160.804	286.527	213.343	GTGAAATGTTTAGGACCACTAG	22
hsa-miR-203b-5p	43.0884	0	86.1768	Inf	Inf	0.000223918	0.00540498	Up	0	0	0	3.75417	11.4442	9.42414	TAGTGGTCCTAAACATTTCACA	22
hsa-miR-20b-5p	17.6097	35.2195	0	0	#NAME?	0.00149592	0.0152921	Down	4.90289	5.11798	0	0	0	0	CAAAGTGCTCATAGTGCAGGTAG	23
hsa-miR-2110	26.7677	0.59694	52.9384	88.683	6.47059	0.00578389	0.0339575	Up	0.0830997	0.0867454	0	2.9497	4.37574	8.44923	TTGGGGAAACGGCCGCTGAGTG	22
hsa-miR-215-3p	22.9822	45.9644	0	0	#NAME?	0.000893035	0.0125641	Down	6.39868	6.6794	0	0	0	0	TCTGTCATTTCTTTAGGCCAATA	23
hsa-miR-219a-1-3p	13.0753	0	26.1506	Inf	Inf	0.00405037	0.026738	Up	0	0	0	1.60893	2.01957	4.22462	AGAGTTGAGTCTGGACGTCCCG	22
hsa-miR-22-5p	45.6339	3.44146	87.8263	25.5201	4.67356	0.0100403	0.0358225	Up	0	0.954199	0	22.525	2.52447	5.93071	AGTTCTTCAGTGGCAAGCTTTA	22
hsa-miR-23b-5p	31.5014	63.0027	0	0	#NAME?	0.00131211	0.0146668	Down	5.98318	11.7974	0	0	0	0	TGGGTTCCTGGCATGCTGATTT	22
hsa-miR-26b-5p	435.805	130.426	741.185	5.68282	2.50661	0.00558366	0.033502	Up	17.7833	18.8238	0.337832	73.6532	58.0627	96.9224	TTCAAGTAATTCAGGATAGGT	21
hsa-miR-29a-3p	163.165	52.398	273.932	5.22791	2.38623	0.0376506	0.105577	Up	7.14658	7.6336	0.0844581	37.9886	16.3249	33.5532	TAGCACCATCTGAAATCGGTTA	22
hsa-miR-3064-5p	7.02422	0	14.0484	Inf	Inf	0.00711643	0.0346341	Up	0	0	0	0.71508	1.17808	2.27479	TCTGGCTGTTGTGGTGTGCAA	21
hsa-miR-30c-2-3p	68.6746	131.13	6.21903	0.0474263	-4.39817	0.0104667	0.0361901	Down	8.72547	4.42402	16.5538	0.53631	0.336596	1.05615	CTGGGAGAAGGCTGTTTACTCT	22
hsa-miR-30e-5p	83.72	3.58164	163.858	45.7495	5.51569	0.000662159	0.011027	Up	0.498598	0.520472	0	14.3016	10.7711	25.4289	TGTAAACATCCTTGACTGGAAG	22
hsa-miR-3122	7.43341	0	14.8668	Inf	Inf	0.00679787	0.0346341	Up	0	0	0	0.983234	1.34638	2.11231	GTTGGGACAAGAGGACGGTCTT	22
hsa-miR-3149	3.31443	0	6.62885	Inf	Inf	0.00974797	0.0353301	Up	0	0	0	0.35754	0.420744	1.21864	TTTGTATGGATATGTGTGTGTAT	23
hsa-miR-3158-3p	460.871	227.948	693.793	3.04365	1.6058	0.0479765	0.130932	Up	20.027	17.1756	18.9186	37.8992	60.5031	107.565	AAGGGCTTCCTCTCTGCAGGAC	22
hsa-miR-3160-3p	8.46395	0	16.9279	Inf	Inf	0.00619364	0.0346341	Up	0	0	0	1.162	1.68298	2.19355	AGAGCTGAGACTAGAAAGCCCA	22
hsa-miR-3174	6.70875	0	13.4175	Inf	Inf	0.00730423	0.0346341	Up	0	0	0	1.07262	1.26223	1.70609	TAGTGAGTTAGAGATGCAGAGCC	23
hsa-miR-3177-3p	4.42406	0	8.84811	Inf	Inf	0.012756	0.0419714	Up	0	0	0	0.35754	0.504893	1.78734	TGCACGGCACTGGGGACACGT	21
hsa-miR-32-3p	4.81219	0	9.62438	Inf	Inf	0.00889957	0.0348326	Up	0	0	0	0.53631	0.925638	1.38112	CAATTTAGTGTGTGTGATATTT	22
hsa-miR-32-5p	12.1342	0	24.2685	Inf	Inf	0.00440398	0.0280753	Up	0	0	0	1.162	1.76713	4.30586	TATTGCACATTACTAAGTTGCA	22
hsa-miR-330-5p	14.6585	0	29.317	Inf	Inf	0.00947652	0.0348326	Up	0	0	0	8.49157	0.504893	1.62485	TCTCTGGGCCTGTGTCTTAGGC	22
hsa-miR-331-5p	10.148	20.296	0	0	#NAME?	0.00279773	0.0207682	Down	2.82539	2.94934	0	0	0	0	CTAGGTATGGTCCCAGGGATCC	22
hsa-miR-340-3p	58.3758	0	116.752	Inf	Inf	3.24481e-05	0.00197045	Up	0	0	0	12.5139	7.65755	16.3298	TCCGTCTCAGTTACTTTATAGC	22
hsa-miR-345-5p	8.14669	0.719519	15.5739	21.6448	4.43595	0.0337423	0.0972924	Up	0.0830997	0	0.0844581	1.07262	1.26223	2.35604	GCTGACTCCTAGTCCAGGGCTC	22
hsa-miR-3605-5p	6.69077	0.719519	12.662	17.5979	4.13733	0.0422424	0.117244	Up	0.0830997	0	0.0844581	0.804464	1.17808	1.78734	TGAGGATGGATAGCAAGGAAGCC	23
hsa-miR-3615	16.9539	0	33.9078	Inf	Inf	0.00420057	0.0269984	Up	0	0	0	9.38542	0.673191	2.11231	TCTCTCGGCTCCTCGCGGCTC	21
hsa-miR-363-3p	579.807	219.351	940.262	4.28657	2.09982	0.0147499	0.0473856	Up	30.4145	31.7488	0.168916	84.0218	87.3465	113.983	AATTGCACGGTATCCATCTGTA	22
hsa-miR-363-5p	9.43565	0	18.8713	Inf	Inf	0.00552936	0.0334219	Up	0	0	0	1.07262	1.34638	3.2497	CGGGTGGATCACGATGCAATTT	22
hsa-miR-3688-3p	6.57633	0	13.1527	Inf	Inf	0.00742011	0.0346341	Up	0	0	0	0.625695	1.00979	2.27479	TATGGAAAGACTTTGCCACTCT	22
hsa-miR-3690	19.2145	0	38.4291	Inf	Inf	0.00210951	0.0181436	Up	0	0	0	7.86587	1.51468	3.65592	ACCTGGACCCAGCGTAGACAAAG	23
hsa-miR-374a-3p	33.0082	0	66.0163	Inf	Inf	0.000545902	0.00928033	Up	0	0	0	12.4245	3.19766	6.41817	CTTATCAGATTGTATTGTAATT	22
hsa-miR-374a-5p	30.7206	0	61.4411	Inf	Inf	0.000727797	0.0114208	Up	0	0	0	8.40218	4.1233	7.06811	TTATAATACAACCTGATAAGTG	22
hsa-miR-374b-5p	13.1569	25.9813	0.332454	0.0127959	-6.28818	0.00593927	0.034372	Down	3.57329	3.8168	0	0	0.0841489	0	ATATAATACAACCTGCTAAGTG	22
hsa-miR-3909	5.83233	0	11.6647	Inf	Inf	0.00792209	0.0346341	Up	0	0	0	0.804464	0.925638	1.78734	TGTCCTCTAGGGCCTGCAGTCT	22
hsa-miR-3913-5p	20.1085	0	40.2169	Inf	Inf	0.0021727	0.0184679	Up	0	0	0	2.32401	2.86106	6.90562	TTTGGGACTGATCTTGATGTCT	22
hsa-miR-424-3p	27.0138	2.10368	51.9239	24.6824	4.62541	0.0244069	0.0740372	Up	0.249299	0.346982	0	8.75972	2.77691	5.5245	CAAAACGTGAGGCGCTGCTAT	21
hsa-miR-425-3p	3.46131	0	6.92262	Inf	Inf	0.00969947	0.0353301	Up	0	0	0	0.446925	0.504893	1.1374	ATCGGGAATGTCGTGTCCGCCC	22
hsa-miR-425-5p	29.7804	0.31286	59.248	189.376	7.56511	0.00232444	0.019159	Up	0	0.0867454	0	3.75417	4.62819	9.42414	AATGACACGATCACTCCCGTTGA	23
hsa-miR-4433a-5p	3.86562	0	7.73125	Inf	Inf	0.00936634	0.0348326	Up	0	0	0	0.446925	0.504893	1.38112	CGTCCCACCCCCCACTCCTGT	21
hsa-miR-4466	86.6675	173.335	0	0	#NAME?	1.93155e-05	0.00157615	Down	10.8861	6.59265	21.7902	0	0	0	GGGTGCGGGCCGGCGGGG	18
hsa-miR-4467	6.24773	0.435439	12.06	27.6963	4.79162	0.0230746	0.0705201	Up	0	0	0.0844581	0.804464	1.09394	1.70609	TGGCGGCGGTAGTTATGGGCTT	22
hsa-miR-4504	3.57186	0	7.14372	Inf	Inf	0.0330807	0.0960636	Up	0	0	0	0.268155	0.336596	1.54361	TGTGACAATAGAGATGAACATG	22
hsa-miR-451a	59826.9	16523.1	103131	6.2416	2.64192	0.00124223	0.0142769	Up	1352.03	1138.19	1512.14	6406.84	8654.04	15791.8	AAACCGTTACCATTACTGAGTT	22
hsa-miR-455-5p	74.9102	149.488	0.332454	0.00222395	-8.81266	0.000239287	0.00540498	Down	9.30717	4.85774	19.4254	0	0.0841489	0	TATGTGCCTTTGGACTACATCG	22
hsa-miR-4647	6.37865	0	12.7573	Inf	Inf	0.00747116	0.0346341	Up	0	0	0	0.625695	0.841489	2.35604	GAAGATGGTGCTGTGCTGAGGAA	23
hsa-miR-4665-5p	3.94065	0	7.88129	Inf	Inf	0.00964544	0.0352945	Up	0	0	0	0.53631	0.75734	1.05615	CTGGGGGACGCGTGAGCGCGAGC	23
hsa-miR-4669	3.57186	0	7.14372	Inf	Inf	0.0330807	0.0960636	Up	0	0	0	0.268155	0.336596	1.54361	TGTGTCCGGGAAGTGGAGGAGG	22
hsa-miR-4677-3p	5.89524	0	11.7905	Inf	Inf	0.00800719	0.0346341	Up	0	0	0	0.804464	1.09394	1.62485	TCTGTGAGACCAAAGAACTACT	22
hsa-miR-4732-3p	24.252	0.435439	48.0685	110.391	6.78648	0.00343049	0.0237227	Up	0	0	0.0844581	11.7094	1.85128	3.16846	GCCCTGACCTGTCCTGTTCTG	21
hsa-miR-4745-5p	12.4801	1.03238	23.9279	23.1774	4.53465	0.0332143	0.0961095	Up	0.0830997	0.0867454	0.0844581	1.43016	2.18787	3.49343	TGAGTGGGGCTCCCGGGACGGCG	23
hsa-miR-4746-5p	17.8048	0	35.6096	Inf	Inf	0.0118635	0.0400027	Up	0	0	0	10.7262	0.841489	1.38112	CCGGTCCCAGGAGAACCTGCAGA	23
hsa-miR-483-5p	867.888	1506.73	229.046	0.152015	-2.71771	0.0152825	0.0488487	Down	108.861	77.4636	165.876	65.9661	14.3053	0.649941	AAGACGGGAGGAAAGAAGGGAG	22
hsa-miR-484	29.3865	0	58.7731	Inf	Inf	0.000890126	0.0125641	Up	0	0	0	3.12847	4.71234	9.66787	TCAGGCTCAGTCCCCTCCCGAT	22
hsa-miR-485-3p	47.0511	93.5389	0.563311	0.00602221	-7.37549	0.00104792	0.0139767	Down	5.81698	3.03609	12.162	0.0893849	0.0841489	0	GTCATACACGGCTCTCCTCTCT	22
hsa-miR-493-3p	44.5046	6.90798	82.1012	11.885	3.57107	0.0484158	0.131691	Up	0.830997	1.12769	0	5.3631	6.56361	12.7551	TGAAGGTCTACTGTGTGCCAGG	22
hsa-miR-503-5p	17.233	0	34.4659	Inf	Inf	0.00286004	0.0208735	Up	0	0	0	2.05585	2.94521	5.28077	TAGCAGCGGGAACAGTTCTGCAG	23
hsa-miR-504-3p	59.0932	118.186	0	0	#NAME?	8.21391e-05	0.00335127	Down	7.56208	3.99029	15.118	0	0	0	GGGAGTGCAGGGCAGGGTTTC	21
hsa-miR-514a-3p	8.26454	0	16.5291	Inf	Inf	0.00640562	0.0346341	Up	0	0	0	0.983234	1.76713	2.11231	ATTGACACTTCTGTGAGTAGA	21
hsa-miR-542-3p	38.4515	74.6463	2.25668	0.0302317	-5.04779	0.00784037	0.0346341	Down	10.3044	10.9299	0	0.53631	0.0841489	0.162485	TGTGACAGATTGATAACTGAAA	22
hsa-miR-548ah-3p	4.84048	0	9.68097	Inf	Inf	0.00853433	0.0346341	Up	0	0	0	0.446925	0.589042	1.86858	CAAAAACTGCAGTTACTTTTGC	22
hsa-miR-548k	3.70979	0	7.41958	Inf	Inf	0.0101032	0.0358225	Up	0	0	0	0.35754	0.75734	1.05615	AAAAGTACTTGCGGATTTTGCT	22
hsa-miR-548n	4.72993	0	9.45987	Inf	Inf	0.00870252	0.0348101	Up	0	0	0	0.625695	0.75734	1.46237	CAAAAGTAATTGTGGATTTTGT	22
hsa-miR-550a-5p	5.94912	0.719519	11.1787	15.5364	3.95758	0.0471812	0.129677	Up	0.0830997	0	0.0844581	0.53631	0.841489	1.94982	AGTGCCTGAGGGAGTAAGAGCCC	23
hsa-miR-561-5p	5.94604	0	11.8921	Inf	Inf	0.00807383	0.0346341	Up	0	0	0	0.71508	1.17808	1.62485	ATCAAGGATCTTAAACTTTGCC	22
hsa-miR-5698	3.6994	0	7.3988	Inf	Inf	0.00935041	0.0348326	Up	0	0	0	0.446925	0.420744	1.38112	TGGGGGAGTGCAGTGATTGTGG	22
hsa-miR-576-5p	3.5	0	6.99999	Inf	Inf	0.00989061	0.0355539	Up	0	0	0	0.268155	0.504893	1.29988	ATTCTAATTTCTCCACGTCTTT	22
hsa-miR-582-3p	33.6897	1.03238	66.347	64.2661	6.00599	0.00447916	0.0283333	Up	0.0830997	0.0867454	0.0844581	9.56419	3.7867	8.04302	TAACTGGTTGAACAACTGAACC	22
hsa-miR-584-5p	401.513	92.0124	711.014	7.72737	2.94998	0.00145916	0.0152921	Up	12.7143	13.0986	0.253374	76.871	58.1469	85.2235	TTATGGTTTGCCTGGGACTGAG	22
hsa-miR-615-3p	24.3059	48.3809	0.230857	0.00477166	-7.71129	0.00210642	0.0181436	Down	6.64798	7.11312	0	0.0893849	0	0	TCCGAGCCTGGGTCTCCCTCTT	22
hsa-miR-618	3.90431	0	7.80862	Inf	Inf	0.0135267	0.0438007	Up	0	0	0	0.268155	0.504893	1.54361	AAACTCTACTTGTCCTTCTGAGT	23
hsa-miR-6505-3p	4.59028	0	9.18056	Inf	Inf	0.0088152	0.0348326	Up	0	0	0	0.35754	0.589042	1.78734	TGACTTCTACCTCTTCCAAAG	21
hsa-miR-651-5p	20.4651	0	40.9303	Inf	Inf	0.0021123	0.0181436	Up	0	0	0	2.50278	3.19766	6.58065	TTTAGGATAAGCTTGACTTTTG	22
hsa-miR-652-3p	23.9739	0.59694	47.3509	79.3227	6.30966	0.00735004	0.0346341	Up	0.0830997	0.0867454	0	2.32401	3.02936	8.85544	AATGGCGCCACTAGGGTTGTG	21
hsa-miR-654-3p	9.37762	0	18.7552	Inf	Inf	0.00551037	0.0334219	Up	0	0	0	1.34077	1.34638	3.00598	TATGTCTGCTGACCATCACCTT	22
hsa-miR-659-5p	5.92978	0.719519	11.14	15.4826	3.95258	0.0470957	0.129677	Up	0.0830997	0	0.0844581	0.625695	0.841489	1.86858	AGGACCTTCCCTGAACCAAGGA	22
hsa-miR-664b-5p	19.4526	0	38.9052	Inf	Inf	0.00225113	0.0189373	Up	0	0	0	7.59772	4.88064	0	TGGGCTAAGGGAGATGATTGGGTA	24
hsa-miR-6721-5p	3.62266	0	7.24531	Inf	Inf	0.0324894	0.0950229	Up	0	0	0	0.17877	0.420744	1.54361	TGGGCAGGGGCTTATTGTAGGAG	23
hsa-miR-6783-3p	3.12714	0	6.25427	Inf	Inf	0.0105231	0.0362313	Up	0	0	0	0.268155	0.589042	0.974911	TTCCTGGGCTTCTCCTCTGTAG	22
hsa-miR-6805-5p	20.953	0	41.906	Inf	Inf	0.00172066	0.0163262	Up	0	0	0	11.0837	1.17808	2.59976	TAGGGGGCGGCTTGTGGAGTGT	22
hsa-miR-6815-5p	147.182	294.363	0	0	#NAME?	7.71395e-06	0.0010491	Down	18.5312	10.9299	37.1615	0	0	0	TAGGTGGCGCCGGAGGAGTCATT	23
hsa-miR-6821-5p	51.9457	103.891	0	0	#NAME?	5.67749e-05	0.0025738	Down	6.56488	3.99029	13.0065	0	0	0	GTGCGTGGTGGCTCGAGGCGGGG	23
hsa-miR-6852-5p	3.30059	0	6.60119	Inf	Inf	0.0173954	0.0545949	Up	0	0	0	0.0893849	0.589042	1.21864	CCCTGGGGTTCTGAGGACATG	21
hsa-miR-6863	5.53857	0	11.0771	Inf	Inf	0.00809975	0.0346341	Up	0	0	0	0.625695	0.75734	1.94982	TAGACGTGGTGAAGGATTGAGTG	23
hsa-miR-6868-3p	6.27361	0	12.5472	Inf	Inf	0.00788662	0.0346341	Up	0	0	0	0.446925	1.17808	2.03107	TTCCTTCTGTTGTCTGTGCAG	21
hsa-miR-760	5.56749	0.59694	10.538	17.6534	4.14188	0.0488911	0.132542	Up	0.0830997	0.0867454	0	0.625695	0.75734	1.78734	CGGCTCTGGGTCTGTGGGGA	20
hsa-miR-7848-3p	13.6208	0	27.2415	Inf	Inf	0.00470832	0.0295538	Up	0	0	0	0.625695	4.71234	2.11231	CTACCCTCGGTCTGCTTACCACA	23
hsa-miR-7976	70.1395	134.651	5.62805	0.0417973	-4.58045	0.0130123	0.0424722	Down	8.22687	4.42402	17.5673	0.17877	0.420744	1.05615	TGCCCTGAGACTTTTGCTC	19
hsa-miR-877-5p	5.79193	0	11.5839	Inf	Inf	0.00817312	0.0346341	Up	0	0	0	0.804464	1.17808	1.46237	GTAGAGGAGATGGCGCAGGG	20
hsa-miR-885-3p	78.0271	156.054	0	0	#NAME?	2.45165e-06	0.000400109	Down	12.6312	10.4094	14.6112	0	0	0	AGGCAGCGGGGTGTAGTGGATA	22
hsa-miR-889-3p	8.0637	0	16.1274	Inf	Inf	0.00630171	0.0346341	Up	0	0	0	0.893849	1.17808	2.76225	TTAATATCGGACAACCATTGT	21
hsa-miR-92b-5p	318.534	509.613	127.454	0.250099	-1.99943	0.0262266	0.0786798	Down	44.8739	36.3463	43.6648	15.7317	15.9041	7.23059	AGGGACGGGACGCGGTGCAGTG	22
hsa-miR-937-3p	13.5824	0	27.1647	Inf	Inf	0.00420195	0.0269984	Up	0	0	0	1.07262	3.7867	2.84349	ATCCGCGCTCTGACTCTCTGCC	22
hsa-miR-942-5p	4.87917	0	9.75834	Inf	Inf	0.0178322	0.0557512	Up	0	0	0	0.268155	0.589042	2.03107	TCTTCTCTGTTTTGGCCATGTG	22
hsa-miR-9985	8.04959	0	16.0992	Inf	Inf	0.00698671	0.0346341	Up	0	0	0	0.35754	2.27202	1.86858	TTCACAGTGGCTAAGCTAT	19
hsa-miR-99a-5p	4736.11	7191.86	2280.37	0.317076	-1.6571	0.00577748	0.0339575	Down	575.881	514.227	653.368	409.472	166.783	169.96	AACCCGTAGATCCGATCTTGTG	22
hsa-miR-99b-3p	38.9673	77.6022	0.332454	0.00428407	-7.8668	0.000462329	0.00811759	Down	10.803	11.2769	0	0	0.0841489	0	CAAGCTCGTGTCTGTGGGTCCG	22
novel102_mature	78.1713	156.343	0	0	#NAME?	0.000106508	0.00358953	Down	9.47337	5.03123	20.5233	0	0	0	TGTTGGTTGGTGTGGTGG	18
novel103_mature	20.5944	41.1889	0	0	#NAME?	0.00113047	0.0139767	Down	5.73388	5.98543	0	0	0	0	GCAGAGCAAAACGGACCATG	20
novel106_mature>novel177_mature	15.7522	0	31.5044	Inf	Inf	0.0032335	0.0225807	Up	0	0	0	2.23462	2.69276	4.54959	GTGGGCTAGTTTCAGACAGGT	21
novel107_mature	6.75232	0	13.5046	Inf	Inf	0.0073422	0.0346341	Up	0	0	0	1.162	1.43053	1.46237	GATGGCTGTAACAAGAAATT	20
novel115_mature	6.57461	0	13.1492	Inf	Inf	0.00766698	0.0346341	Up	0	0	0	0.446925	1.26223	2.11231	CAAGGGTGTGACTGGATA	18
novel117_mature	16.0821	0	32.1642	Inf	Inf	0.00315573	0.022392	Up	0	0	0	1.51954	2.44032	5.60574	AGATTTGAGAGGGGCTGAG	19
novel119_mature	7.06227	0	14.1245	Inf	Inf	0.00693602	0.0346341	Up	0	0	0	1.162	1.17808	1.94982	CCACTGTTGGGATCCTGC	18
novel120_mature	54.8099	108.787	0.832854	0.00765584	-7.02922	0.000467557	0.00811759	Down	7.39588	4.07703	13.3444	0.0893849	0.0841489	0.0812426	TAGGAGGGCCGCTGCGGTGAGT	22
novel123_mature	4.17858	8.35716	0	0	#NAME?	0.00578442	0.0339575	Down	1.1634	1.21444	0	0	0	0	ATGGGATGGATTCTAGAAATGG	22
novel128_mature	25.0715	50.143	0	0	#NAME?	0.000722398	0.0114208	Down	6.98038	7.28661	0	0	0	0	GGGAAGGACAGAGGGCTG	18
novel132_mature	5.796	0	11.592	Inf	Inf	0.00787165	0.0346341	Up	0	0	0	0.53631	0.673191	2.27479	GGGTCTGTAAAAAAAAAAAAG	21
novel133_mature	20.5944	41.1889	0	0	#NAME?	0.00113047	0.0139767	Down	5.73388	5.98543	0	0	0	0	AGGAAAAGGGGATCGTGG	18
novel135_mature	15.8189	31.6378	0	0	#NAME?	0.00175239	0.0164362	Down	4.40429	4.59751	0	0	0	0	GGTGGCTCTGGAATCTCTCTCT	22
novel144_mature	3.74124	0	7.48249	Inf	Inf	0.0102416	0.0358676	Up	0	0	0	0.35754	0.841489	0.974911	TCCGGTCCGTACAAACTCTGC	21
novel145_mature	10.676	0	21.352	Inf	Inf	0.00504378	0.0311797	Up	0	0	0	1.34077	1.93542	3.08722	GTGTGGTTCTATTTTGTT	18
novel149_mature	6.39076	0	12.7815	Inf	Inf	0.00748359	0.0346341	Up	0	0	0	0.71508	0.925638	2.19355	ATGCTGAGTTGCTTGAGT	18
novel14_mature	71.176	142.352	0	0	#NAME?	4.19004e-05	0.00227938	Down	8.89167	5.20472	18.074	0	0	0	TTGGGATGAGGGGAGGGTC	19
novel151_mature	55.9412	111.882	0	0	#NAME?	5.35349e-05	0.00256968	Down	7.06348	4.16378	14.1045	0	0	0	AGTGTTTGGGTTTTGGGGGG	20
novel155_mature	5.03093	0	10.0619	Inf	Inf	0.00855798	0.0346341	Up	0	0	0	0.625695	0.841489	1.54361	TTTGATCTGTTAGGCTTAGTGC	22
novel156_mature	0.875949	1.7519	0	0	#NAME?	0.0365965	0.104415	Down	0.166199	0.0867454	0.168916	0	0	0	GGGACGGGGGCGGGGCGC	18
novel158_mature	6.36419	0	12.7284	Inf	Inf	0.00745626	0.0346341	Up	0	0	0	0.983234	1.00979	1.86858	GGCGGCTCCAGGGACCTGG	19
novel168_mature	4.99053	0	9.98105	Inf	Inf	0.00888075	0.0348326	Up	0	0	0	0.625695	1.09394	1.21864	AAGTGACTGCCCATTCTGC	19
novel172_mature	3.09568	0	6.19136	Inf	Inf	0.010332	0.0358764	Up	0	0	0	0.268155	0.504893	1.05615	TGGAGGGTGTTTCTGAGACAGT	22
novel179_mature	4.35219	0	8.70439	Inf	Inf	0.00918559	0.0348326	Up	0	0	0	0.35754	0.673191	1.54361	AGCCTGGAGGACTGAGGA	18
novel180_mature	7.28653	0	14.5731	Inf	Inf	0.00689399	0.0346341	Up	0	0	0	0.893849	1.26223	2.19355	TTGGAGGCACTGGAGGCG	18
novel183_mature	21.9037	43.5766	0.230857	0.00529773	-7.56041	0.0026576	0.0202761	Down	6.06628	6.33241	0	0.0893849	0	0	GACTCTAGACAGACTGCCTG	20
novel184_mature	7.90299	0	15.806	Inf	Inf	0.00654162	0.0346341	Up	0	0	0	0.53631	1.26223	2.84349	CTTACTGGGGTGGGACTGC	19
novel186_mature	74.2134	148.427	0	0	#NAME?	9.69333e-05	0.00358953	Down	9.30717	4.68425	19.3409	0	0	0	AGGAGGTGGAGCGGGGAG	18
novel188_mature>novel219_mature	79.0464	158.093	0	0	#NAME?	0.000189004	0.00497507	Down	9.05787	4.94449	21.199	0	0	0	AGGTCAATATTCCTGAGC	18
novel18_mature	5.18505	0	10.3701	Inf	Inf	0.00849705	0.0346341	Up	0	0	0	0.53631	0.841489	1.70609	GTGGGCTGGGCGTGGTGGCT	20
novel199_mature>novel226_mature	28.3759	55.8283	0.923429	0.0165405	-5.91785	0.00593052	0.034372	Down	7.72828	8.15407	0	0.35754	0	0	GGGAAGCCGGGGCGTGGGC	19
novel200_mature	13.264	0	26.528	Inf	Inf	0.00406313	0.026738	Up	0	0	0	1.60893	2.52447	3.73716	TTTGCGATTTGGCTCACC	18
novel20_mature	15.5204	31.0409	0	0	#NAME?	0.00179792	0.0166717	Down	4.32119	4.51076	0	0	0	0	TCTGTGGGAGGTGAGACGACGC	22
novel212_mature	19.9975	39.995	0	0	#NAME?	0.0011974	0.0141605	Down	5.56768	5.81194	0	0	0	0	AGACAACCGGGCCCAGAGACT	21
novel213_mature	2.82614	0	5.65227	Inf	Inf	0.0107851	0.0369774	Up	0	0	0	0.268155	0.504893	0.893669	ACACTTACAACTCTGGAAAAG	21
novel215_mature	12.2373	24.4745	0	0	#NAME?	0.00236221	0.0192756	Down	3.40709	3.55656	0	0	0	0	TGTCTGCAGGCTCTTGAGGAGGT	23
novel216_mature	4.85747	0	9.71495	Inf	Inf	0.00857364	0.0346341	Up	0	0	0	0.804464	0.841489	1.29988	TGAGGTTGTTGGCTGGGTAGG	21
novel222_mature	5.85891	0	11.7178	Inf	Inf	0.00795838	0.0346341	Up	0	0	0	0.53631	0.841489	2.11231	TCTCTTCTGTTTGTCTGA	18
novel223_mature	0.999081	0	1.99816	Inf	Inf	0.037604	0.105577	Up	0	0	0	0.17877	0.252447	0.162485	CCTGGCAGGAGGTAGAGC	18
novel225_mature	7.46175	14.9235	0	0	#NAME?	0.00349369	0.0237571	Down	2.07749	2.16864	0	0	0	0	GGTGTGCAGTGGACTCAAACTAGAA	25
novel228_mature>novel241_mature	1.68554	3.37107	0	0	#NAME?	0.0275386	0.0820127	Down	0.166199	0.173491	0.42229	0	0	0	CGGGCGGCGGCTCGGCGG	18
novel229_mature	4.39341	0	8.78682	Inf	Inf	0.00929919	0.0348326	Up	0	0	0	0.893849	1.09394	0.649941	ACCTGTAGAACCAACTAC	18
novel232_mature>novel236_mature	65.3178	130.636	0	0	#NAME?	0.000114372	0.00358953	Down	8.30997	4.07703	16.9761	0	0	0	GGTGGACGGGAGTGAGGA	18
novel233_mature	6.04213	0	12.0843	Inf	Inf	0.00789876	0.0346341	Up	0	0	0	0.893849	1.17808	1.54361	TCTTCCAGGGTGGCTCTCAAC	21
novel235_mature	11.0434	22.0868	0	0	#NAME?	0.0026031	0.0202298	Down	3.07469	3.20958	0	0	0	0	TGTGGGTGATGAGGGCTGCAGGTGC	25
novel239_mature	5.68373	0	11.3675	Inf	Inf	0.00833548	0.0346341	Up	0	0	0	0.53631	1.09394	1.70609	AATGGTGAGTGGGATAAGC	19
novel23_mature>novel31_mature	6.42222	0	12.8444	Inf	Inf	0.00751567	0.0346341	Up	0	0	0	0.71508	1.00979	2.11231	TTCGGGAGAGGACTTACAGGT	21
novel240_mature	58.4024	116.805	0	0	#NAME?	8.06007e-05	0.00335127	Down	7.22968	4.16378	14.9491	0	0	0	TTCGGGTTTAGAGGTTTCTGTT	22
novel242_mature>novel261_mature	63.7567	127.513	0	0	#NAME?	0.000135998	0.00396337	Down	7.22968	4.59751	16.7227	0	0	0	CGTGGGGCGGGTGGGGACG	19
novel246_mature	1.49235	2.9847	0	0	#NAME?	0.0250046	0.0755696	Down	0.415499	0.433727	0	0	0	0	GGTGGACCGGGCGGGGGT	18
novel247_mature	4.22953	0	8.45907	Inf	Inf	0.00938217	0.0348326	Up	0	0	0	0.446925	0.75734	1.29988	CCTGGGCTTTCTGCTGACC	19
novel253_mature	20.8929	41.7858	0	0	#NAME?	0.00109815	0.0139767	Down	5.81698	6.07218	0	0	0	0	GGACGAGGCGGCGCTGTGCTG	21
novel254_mature	3.85351	0	7.70703	Inf	Inf	0.0132864	0.0431941	Up	0	0	0	0.35754	0.420744	1.54361	TTTGCAGTGCTTGTGGTCA	19
novel256_mature	4.18597	0	8.37193	Inf	Inf	0.00925222	0.0348326	Up	0	0	0	0.35754	0.589042	1.54361	ATGTGTAGCTTAATTTGA	18
novel257_mature	17.9082	35.8164	0	0	#NAME?	0.0014559	0.0152921	Down	4.98598	5.20472	0	0	0	0	CTCTCCTAACCTCGCTCTCG	20
novel264_mature	3.58879	7.17758	0	0	#NAME?	0.0128326	0.0420537	Down	0.332399	0.346982	0.929039	0	0	0	GGCGGGCGGGGCCGGGGA	18
novel265_mature	17.7046	0	35.4092	Inf	Inf	0.0166885	0.0527824	Up	0	0	0	0.625695	6.98436	1.86858	TCCGGGATGGGCACTCTGCTC	21
novel266_mature	23.5791	47.1583	0	0	#NAME?	0.000840937	0.0125641	Down	6.56488	6.85289	0	0	0	0	TGGTGTGGATCAGTTGGTAGA	21
novel273_mature	0.967626	0	1.93525	Inf	Inf	0.035648	0.102425	Up	0	0	0	0.17877	0.168298	0.243728	GGGTGGGGCTGGTGGGGC	18
novel284_mature	1.64149	0	3.28297	Inf	Inf	0.0374532	0.105577	Up	0	0	0	0.17877	0.168298	0.649941	TTCGTGGGAGGCAGAGCAAGTG	22
novel292_mature	23.8776	47.7552	0	0	#NAME?	0.000815916	0.012562	Down	6.64798	6.93963	0	0	0	0	GACAGATCTAGACCCTGACT	20
novel293_mature	6.75955	0	13.5191	Inf	Inf	0.00734846	0.0346341	Up	0	0	0	0.983234	1.34638	1.70609	TAGAGCTGAATTACTTTCC	19
novel295_mature	4.84048	0	9.68097	Inf	Inf	0.00853433	0.0346341	Up	0	0	0	0.446925	0.589042	1.86858	AGAGACGTCGGCGTGAGCCC	20
novel300_mature	81.4081	162.816	0	0	#NAME?	3.02418e-05	0.00197045	Down	9.55647	6.50591	20.6922	0	0	0	ATGGGAGACAGACTGTGG	18
novel304_mature>novel327_mature	48.9035	97.8069	0	0	#NAME?	0.000361481	0.00685973	Down	6.06628	2.77585	13.0065	0	0	0	GACGTGGACCGGCTGGAGGAG	21
novel305_mature	8.59384	0	17.1877	Inf	Inf	0.00610629	0.0346341	Up	0	0	0	0.893849	1.51468	2.68101	GGTGGCGGCGGTGGCGGG	18
novel310_mature	5.96538	0	11.9308	Inf	Inf	0.00809874	0.0346341	Up	0	0	0	0.625695	1.17808	1.70609	TTGGTTTGTGGTGGGGGT	18
novel311_mature	47.0786	94.1571	0	0	#NAME?	0.00012114	0.00366112	Down	5.48458	3.64331	12.0775	0	0	0	AAGAGTGCGGCGGCGGACGGA	21
novel317_mature>novel322_mature	21.6053	42.9797	0.230857	0.00537131	-7.54051	0.00273495	0.0206641	Down	5.98318	6.24567	0	0.0893849	0	0	CTGGGGAACCTCATGGCC	18
novel320_mature	3.28317	6.56634	0	0	#NAME?	0.00833164	0.0346341	Down	0.914097	0.954199	0	0	0	0	GTGGACGTGGCCGAGCGGC	19
novel321_mature	3.2564	0	6.51279	Inf	Inf	0.00943766	0.0348326	Up	0	0	0	0.625695	0.420744	0.974911	TGACTGGAGGACCGAGCC	18
novel323_mature	3.08845	0	6.1769	Inf	Inf	0.0102881	0.0358764	Up	0	0	0	0.446925	0.589042	0.812426	TCTTCCATGACTGCATCTTT	20
novel329_mature	14.8428	29.6855	0	0	#NAME?	0.00192211	0.0172356	Down	4.07189	4.25052	0.0844581	0	0	0	GCTGGACTAGGCTGGGCT	18
novel331_mature>novel333_mature>novel341_mature	20.8929	41.7858	0	0	#NAME?	0.00109815	0.0139767	Down	5.81698	6.07218	0	0	0	0	AACGGCGGCTGGAACAAGGTTC	22
novel337_mature	91.6559	174.709	8.60279	0.0492407	-4.344	0.00279964	0.0207682	Down	13.296	11.4504	17.0605	0.446925	0.589042	1.54361	TCAGACGTCTCGAGGCTCGCG	21
novel344_mature	8.35716	16.7143	0	0	#NAME?	0.00323768	0.0225807	Down	2.32679	2.42887	0	0	0	0	TCCCCCGGTCACCTGTCTCTGTG	23
novel349_mature	5.46182	0	10.9236	Inf	Inf	0.0083035	0.0346341	Up	0	0	0	0.35754	0.75734	2.11231	AATTGGGTGACGGGGTTGGA	20
novel352_mature	19.1021	38.2042	0	0	#NAME?	0.00130356	0.0146668	Down	5.31838	5.55171	0	0	0	0	AGGAGGGGCTGCAGCTGGGGT	21
novel353_mature	4.9946	0	9.9892	Inf	Inf	0.0122069	0.0405587	Up	0	0	0	0.35754	0.589042	2.03107	TTTGTTCTGGGATCTTTGC	19
novel356_mature	4.39576	0	8.79152	Inf	Inf	0.00930565	0.0348326	Up	0	0	0	0.446925	0.841489	1.29988	TTACTTGAGGCTGGGCATG	19
novel357_mature	4.42722	0	8.85443	Inf	Inf	0.00939188	0.0348326	Up	0	0	0	0.446925	0.925638	1.21864	TAGGGAAAATGTACAGAAATGG	22
novel361_mature	21.4605	0	42.921	Inf	Inf	0.0121965	0.0405587	Up	0	0	0	13.1396	0.841489	1.70609	TATCCGCTGGCTTACTCTCT	20
novel363_mature	6.28021	0	12.5604	Inf	Inf	0.00762342	0.0346341	Up	0	0	0	0.893849	1.09394	1.78734	TTCTGTCCTGGTATCTGAACC	21
novel372_mature	161.216	267.529	54.9032	0.205223	-2.28473	0.0263879	0.0788738	Down	26.5088	23.3345	17.9896	1.60893	8.75148	4.87456	ATGGTGGTGACAGTGGGC	18
novel379_mature	35.5179	71.0359	0	0	#NAME?	0.000234961	0.00540498	Down	9.88887	10.3227	0	0	0	0	TTGAGGTCTTTTTACCTGGAA	21
novel381_mature	16.7143	33.4286	0	0	#NAME?	0.00162062	0.0157432	Down	4.65359	4.85774	0	0	0	0	TCCTTTCCCAGTCGGTGGAACCC	23
novel384_mature	21.2466	39.8335	2.65963	0.0667687	-3.90468	0.0301324	0.0887656	Down	5.48458	5.7252	0.0844581	0	0.673191	0	TGTACTGTCTGGCTGGGCA	19
novel393_mature	6.77574	0	13.5515	Inf	Inf	0.00713571	0.0346341	Up	0	0	0	0.804464	0.925638	2.35604	TGAGGCCTGTGCTCATGAC	19
novel394_mature	4.38906	8.77812	0	0	#NAME?	0.00720461	0.0346341	Down	0.581698	0.433727	1.0135	0	0	0	TGAGTCTGCCTGTCTGTT	18
novel395_mature>novel515_mature	17.3113	34.6225	0	0	#NAME?	0.00153671	0.0152921	Down	4.81979	5.03123	0	0	0	0	TGTGGGTGGACGTGGTTGGTG	21
novel398_mature	12.5357	25.0715	0	0	#NAME?	0.00230537	0.019159	Down	3.49019	3.64331	0	0	0	0	ACTGGGAGGTGTATGTGGGAGAC	23
novel406_mature	5.1657	0	10.3314	Inf	Inf	0.00845701	0.0346341	Up	0	0	0	0.625695	0.841489	1.62485	TGGAGGAGGAAGTGGAGGCCGCT	23
novel413_mature	50.1773	100.355	0	0	#NAME?	0.000383007	0.00710304	Down	5.90008	3.03609	13.4288	0	0	0	TTCATGGCGATGGTGGGACC	20
novel422_mature	11.6403	23.2807	0	0	#NAME?	0.00247989	0.0198391	Down	3.24089	3.38307	0	0	0	0	AGAACGGACTTGGGAGCCCTCCTT	24
novel427_mature	1.23717	0	2.47434	Inf	Inf	0.0218993	0.0674335	Up	0	0	0	0.17877	0.168298	0.406213	AGGGGTGTGACTGAGGGGA	19
novel428_mature	0.814659	1.62932	0	0	#NAME?	0.0365965	0.104415	Down	0.166199	0.173491	0.0844581	0	0	0	GCTGGACTAAGCTGGACT	18
novel434_mature	5.62254	0	11.2451	Inf	Inf	0.00791774	0.0346341	Up	0	0	0	0.71508	0.673191	2.03107	CGCGGGTGCTTACTGACC	18
novel436_mature	67.8361	135.672	0	0	#NAME?	0.0118276	0.0400027	Down	0	5.98543	22.128	0	0	0	CCGGAGCTGGTGGAGGTG	18
novel443_mature	19.699	39.398	0	0	#NAME?	0.00123201	0.0142769	Down	5.48458	5.7252	0	0	0	0	TGTTGTCTGGGCCTGTGAAGCTG	23
novel445_mature	68.5655	137.131	0	0	#NAME?	0.000168496	0.00458308	Down	8.06068	4.42402	18.1585	0	0	0	CGCAGCCTGGCTGGGGAGGG	20
novel451_mature	8.55027	0	17.1005	Inf	Inf	0.00608697	0.0346341	Up	0	0	0	0.804464	1.34638	2.92473	TTTAGGGTGATTATGAGC	18
novel452_mature	1.23571	2.47142	0	0	#NAME?	0.0170366	0.0536753	Down	0.249299	0.0867454	0.253374	0	0	0	ACAGGCTGGTCTCCCCCA	18
novel455_mature	3.97933	0	7.95867	Inf	Inf	0.00978507	0.0353301	Up	0	0	0	0.35754	0.75734	1.21864	TAAGTGCTGTCTTTCAATGAGC	22
novel462_mature>novel505_mature	18.2067	36.4133	0	0	#NAME?	0.00141666	0.0152921	Down	5.06908	5.29147	0	0	0	0	TGGAGCTGTGGTCACTGGAG	20
novel465_mature	47.1639	94.3277	0	0	#NAME?	0.00010013	0.00358953	Down	6.48178	3.46982	11.5708	0	0	0	AGCGGGATGTTGTGGGCAATG	21
novel473_mature	11.3419	22.6837	0	0	#NAME?	0.0025408	0.0199355	Down	3.15779	3.29633	0	0	0	0	AACATTAACGATGACAGGGGTAG	23
novel476_mature	17.0128	34.0256	0	0	#NAME?	0.00157828	0.0155166	Down	4.73669	4.94449	0	0	0	0	CTGTGCTGGGAGACTCTTC	19
novel477_mature	2.51303	0	5.02605	Inf	Inf	0.0215182	0.0667638	Up	0	0	0	0.17877	0.336596	0.974911	AATGGTGCTCTGGGGCTGGAGGC	23
novel479_mature	39.3049	78.6097	0	0	#NAME?	0.000249202	0.00540498	Down	5.23528	2.94934	9.71268	0	0	0	AGGAGGCCAGGACGTTTGTGAAGA	24
novel484_mature	6.24153	0	12.4831	Inf	Inf	0.00758116	0.0346341	Up	0	0	0	1.07262	1.09394	1.62485	ACGGAGACTTGTGCCTTGGGGA	22
novel486_mature	2.19268	0	4.38537	Inf	Inf	0.0114495	0.0389284	Up	0	0	0	0.268155	0.252447	0.812426	GCAGGCGCTGGAGAACCC	18
novel488_mature>novel594_mature	23.2807	46.5613	0	0	#NAME?	0.00086664	0.0125641	Down	6.48178	6.76614	0	0	0	0	ACTGGAGTTGGGGGGTGG	18
novel490_mature	42.1733	84.3466	0	0	#NAME?	0.000228642	0.00540498	Down	4.81979	3.12283	10.9795	0	0	0	TGGCCTTGTTGGTCTGAGACTTGT	24
novel494_mature	6.01302	0	12.026	Inf	Inf	0.00786302	0.0346341	Up	0	0	0	0.446925	0.841489	2.27479	TCTGGGGCTCTGTGGAAGA	19
novel495_mature>novel497_mature	20.296	40.5919	0	0	#NAME?	0.00116355	0.0141605	Down	5.65078	5.89869	0	0	0	0	CTCGGATCCGGCGGCGCTG	19
novel499_mature	30.1455	60.2909	0	0	#NAME?	0.000424186	0.00769191	Down	8.39307	8.76129	0	0	0	0	GGGAGGTGGGCGTCCGGC	18
novel500_mature	1.23717	0	2.47434	Inf	Inf	0.0218993	0.0674335	Up	0	0	0	0.17877	0.168298	0.406213	GGGGACTGGCTTTGATTT	18
novel502_mature	1830.54	3280.46	380.628	0.116029	-3.10744	2.29426e-06	0.000400109	Down	244.563	249.393	299.657	27.7093	64.0373	16.8985	AGGCTGGACTGAGTGGGG	18
novel518_mature	4.98013	0	9.96027	Inf	Inf	0.00844576	0.0346341	Up	0	0	0	0.71508	0.75734	1.54361	TTGAAATCCTCTCTGACT	18
novel519_mature	34.2373	68.4746	0	0	#NAME?	0.000941631	0.0128062	Down	3.82259	2.08189	9.29039	0	0	0	CGGTGGGGCATGGCGGGTT	19
novel521_mature	10.1773	0	20.3546	Inf	Inf	0.00521326	0.0319851	Up	0	0	0	1.34077	1.68298	3.08722	GCACTGGACTTTGAGCTT	18
novel525_mature	11.9388	23.8776	0	0	#NAME?	0.00242037	0.0195547	Down	3.32399	3.46982	0	0	0	0	TTTGATTGCATGATGGGGGAGGTG	24
novel52_mature	26.387	0	52.7739	Inf	Inf	0.00119711	0.0141605	Up	0	0	0	3.03909	4.20744	8.53047	GTGAAGGTGAGTTGAGAA	18
novel530_mature	66.2679	132.536	0	0	#NAME?	1.81328e-05	0.00157615	Down	8.47617	5.29147	16.3849	0	0	0	GGGAGTGAGGCTGTGGGC	18
novel534_mature>novel548_mature	5.69756	0	11.3951	Inf	Inf	0.00803333	0.0346341	Up	0	0	0	0.804464	0.925638	1.70609	TCACTGTGCCATCTGCTT	18
novel537_mature	17.3113	34.6225	0	0	#NAME?	0.00153671	0.0152921	Down	4.81979	5.03123	0	0	0	0	TGGGCCAGGACTAAGGGATGGG	22
novel538_mature	26.9101	53.1277	0.692572	0.013036	-6.26136	0.00475117	0.0295951	Down	7.39588	7.72034	0	0.268155	0	0	GCAGGGATGGGGCAGCTG	18
novel543_mature	4.90339	0	9.80679	Inf	Inf	0.00867993	0.0348101	Up	0	0	0	0.446925	0.75734	1.70609	TCTGGGGGACTCGGAGGGA	19
novel545_mature	5.5966	0	11.1932	Inf	Inf	0.00819573	0.0346341	Up	0	0	0	0.35754	0.75734	2.19355	TGAGCAGAGGTCTAGGCGCAGCT	23
novel56_mature	1.64878	3.29756	0	0	#NAME?	0.0255319	0.0768784	Down	0.415499	0.520472	0	0	0	0	TCCTGGGGCTGGAGGAGG	18
novel571_mature	5.9694	11.9388	0	0	#NAME?	0.00397168	0.0265647	Down	1.66199	1.73491	0	0	0	0	ACTGTATTTGCAGAGTCCTAA	21
novel573_mature	16.1174	32.2348	0	0	#NAME?	0.00170767	0.0163262	Down	4.48739	4.68425	0	0	0	0	GCGGGCCGGGTGGGGGGA	18
novel576_mature	67.0113	134.023	0	0	#NAME?	0.000218468	0.00540498	Down	8.39307	3.73005	17.8206	0	0	0	TTGAGTCTGGTAATTGGA	18
novel578_mature	17.9082	35.8164	0	0	#NAME?	0.0014559	0.0152921	Down	4.98598	5.20472	0	0	0	0	GCTGGAGGGGCTGCTGTTGGTC	22
novel581_mature	0.89541	1.79082	0	0	#NAME?	0.0471987	0.129677	Down	0.249299	0.260236	0	0	0	0	AGGAGTTCTGGGCTGTAGTGCT	22
novel582_mature	2.24863	4.49725	0	0	#NAME?	0.036937	0.105019	Down	0.332399	0.0867454	0.591206	0	0	0	AGTGAGAACCTTGAAGAT	18
novel604_mature	5.18017	0	10.3603	Inf	Inf	0.0139683	0.0450518	Up	0	0	0	0.268155	0.673191	2.11231	TTTTTCTGGGCGTGATGA	18
novel607_mature	11.3419	22.6837	0	0	#NAME?	0.0025408	0.0199355	Down	3.15779	3.29633	0	0	0	0	TTGAGGATCGTGGAGCTGG	19
novel611_mature	9.84951	19.699	0	0	#NAME?	0.00286499	0.0208735	Down	2.74229	2.8626	0	0	0	0	CCATGGGGTGCCGGGCTGTTTTTCT	25
novel613_mature	6.87733	0	13.7547	Inf	Inf	0.00721942	0.0346341	Up	0	0	0	0.625695	1.09394	2.35604	TTAGGGGGTGCTGAGTTG	18
novel615_mature	24.2731	0	48.5462	Inf	Inf	0.0180981	0.0563666	Up	0	0	0	0.893849	9.92957	2.11231	AAGCTGGTCTGAGAGGATG	19
novel629_mature	11.1588	22.0868	0.230857	0.0104523	-6.58004	0.00702948	0.0346341	Down	3.07469	3.20958	0	0.0893849	0	0	AGCTGGACGTGTTTGAGGGGAGTG	24
novel62_mature	46.8747	93.7494	0	0	#NAME?	0.000105104	0.00358953	Down	6.14938	3.38307	11.7397	0	0	0	AGAAGTGGGGTGGGACGACAGT	22
novel639_mature	6.12122	0	12.2424	Inf	Inf	0.00771239	0.0346341	Up	0	0	0	0.71508	0.925638	2.03107	ATTCCTGAATAGAGTTGCTG	20
novel64_mature>novel483_mature	6.23177	0	12.4635	Inf	Inf	0.00757042	0.0346341	Up	0	0	0	0.53631	0.75734	2.43728	ACCGAGTAGGCTGTGTCT	18
novel66_mature	46.3356	5.23541	87.4358	16.7009	4.06185	0.0155795	0.0494664	Up	0.166199	0.0867454	0.844581	6.61449	7.5734	12.1864	TTGAGATTTGAGAGGGGCC	19
novel67_mature>novel98_mature>novel100_mature	49.6086	99.2172	0	0	#NAME?	0.00035421	0.00685973	Down	6.31558	2.68911	13.1755	0	0	0	TCTCTGGCCTCTATTACTGTG	21
novel69_mature	17.3113	34.6225	0	0	#NAME?	0.00153671	0.0152921	Down	4.81979	5.03123	0	0	0	0	CCACACCTCGCTCTTCCCTCAG	22
novel73_mature	23.2807	46.5613	0	0	#NAME?	0.00086664	0.0125641	Down	6.48178	6.76614	0	0	0	0	GGGGGTCCTGGGAAGAGT	18
novel74_mature	734.257	1124.94	343.571	0.305411	-1.71117	0.0119316	0.0400666	Down	118.085	135.149	45.354	30.3909	50.9942	19.1733	AGGAAGGTGGGGATGACGG	19
novel76_mature	6.43921	0	12.8784	Inf	Inf	0.00753289	0.0346341	Up	0	0	0	1.07262	1.26223	1.54361	TGTGGGTGCTTGTGAAGG	18
novel85_mature	22.6837	45.3674	0	0	#NAME?	0.000920134	0.0127259	Down	6.31558	6.59265	0	0	0	0	TGTGGGGCTGGGAAGAAGAGG	21
novel89_mature>novel104_mature	8.34364	0	16.6873	Inf	Inf	0.00628781	0.0346341	Up	0	0	0	0.804464	1.51468	2.59976	GGGATGATGACGATGATA	18
novel8_mature	30.3945	60.7891	0	0	#NAME?	0.000708754	0.0114208	Down	2.99159	2.42887	8.10797	0	0	0	TGTGGGACCTGGGGTGGGGCT	21
novel92_mature	67.6101	135.22	0	0	#NAME?	0.000142608	0.00401268	Down	7.64518	4.771	17.8206	0	0	0	TTGCTGGGAGGGGCTGGAT	19
novel93_mature	15.222	30.4439	0	0	#NAME?	0.0018443	0.0167339	Down	4.23809	4.42402	0	0	0	0	TAATTATGGAGGACAGGGGAGAGG	24
novel97_mature	1.13385	0	2.26771	Inf	Inf	0.0285613	0.0847491	Up	0	0	0	0.17877	0.252447	0.243728	ATGAGATTTGAGAGGGGCA	19
