# Supplementary material for: Sevoflurane-induced POCD-associated exosomes delivered miR-584-5p regulates the growth of human microglia HMC3 cells through targeting BDNF
Source: Aging (Albany NY). 2022 Nov 30;14(24):9890–907. doi: 10.18632/aging.204398 (PMC9831737; doi:10.18632/aging.204398)
Supplement: Supplementary Table 2 [file aging-14-204398-s002.xlsx]

## Sheet: enrichment-go-Group_T-vs-Group_
Supplementary Table 2. All gene ontology terms enrichment of these DE-miRNAs with P value < 0.0.
id	Term	Category	pValue	qValue	Enrichment_score
GO:0005886	plasma membrane	cellular_component	1.02902e-122	1.36067e-118	1.08615
GO:0003779	actin binding	molecular_function	4.6023e-57	3.04281e-53	1.1823
GO:0030036	actin cytoskeleton organization	biological_process	5.6997e-53	2.51224e-49	1.25649
GO:0030425	dendrite	cellular_component	7.65573e-51	2.53079e-47	1.18252
GO:0007155	cell adhesion	biological_process	1.84288e-38	4.87367e-35	1.15885
GO:0030198	extracellular matrix organization	biological_process	2.13778e-37	4.71131e-34	1.22794
GO:0005887	integral component of plasma membrane	cellular_component	9.2366e-37	1.74479e-33	1.09229
GO:0030424	axon	cellular_component	5.47207e-34	9.04465e-31	1.16827
GO:0014069	postsynaptic density	cellular_component	1.54687e-33	2.2727e-30	1.15705
GO:0015629	actin cytoskeleton	cellular_component	3.00526e-32	3.97385e-29	1.17533
GO:0035023	regulation of Rho protein signal transduction	biological_process	1.98323e-31	2.38403e-28	1.23837
GO:1903861	positive regulation of dendrite extension	biological_process	4.88515e-31	5.38303e-28	1.31031
GO:0046777	protein autophosphorylation	biological_process	6.38307e-30	6.49256e-27	1.19541
GO:0048791	calcium ion-regulated exocytosis of neurotransmitter	biological_process	1.42689e-29	1.34769e-26	1.2898
GO:0005089	Rho guanyl-nucleotide exchange factor activity	molecular_function	1.41167e-28	1.24443e-25	1.23128
GO:0007269	neurotransmitter secretion	biological_process	1.74164e-28	1.43935e-25	1.25429
GO:0030027	lamellipodium	cellular_component	2.11063e-28	1.64169e-25	1.1721
GO:0030054	cell junction	cellular_component	5.14428e-28	3.77904e-25	1.10075
GO:2000463	positive regulation of excitatory postsynaptic potential	biological_process	2.02372e-27	1.4084e-24	1.27438
GO:0045202	synapse	cellular_component	3.90926e-27	2.58461e-24	1.16233
GO:0005925	focal adhesion	cellular_component	1.10745e-26	6.97326e-24	1.13208
GO:0008134	transcription factor binding	molecular_function	8.84817e-26	5.31815e-23	1.151
GO:0043025	neuronal cell body	cellular_component	8.76085e-25	5.03672e-22	1.13503
GO:0045893	positive regulation of transcription, DNA-templated	biological_process	2.48268e-24	1.36785e-21	1.1122
GO:0005856	cytoskeleton	cellular_component	4.08189e-24	2.15899e-21	1.11911
GO:0045944	positive regulation of transcription from RNA polymerase II promoter	biological_process	2.30406e-23	1.17179e-20	1.08518
GO:0042391	regulation of membrane potential	biological_process	2.94387e-23	1.44173e-20	1.22929
GO:0048041	focal adhesion assembly	biological_process	3.94889e-23	1.86487e-20	1.31537
GO:0005085	guanyl-nucleotide exchange factor activity	molecular_function	4.53567e-23	2.06811e-20	1.19038
GO:0005604	basement membrane	cellular_component	6.51565e-23	2.87188e-20	1.27855
GO:0097110	scaffold protein binding	molecular_function	1.03956e-22	4.43424e-20	1.26961
GO:0007268	chemical synaptic transmission	biological_process	1.654e-22	6.83464e-20	1.15775
GO:0005096	GTPase activator activity	molecular_function	1.70769e-22	6.84268e-20	1.11761
GO:0008201	heparin binding	molecular_function	4.11505e-22	1.60039e-19	1.20221
GO:0005509	calcium ion binding	molecular_function	4.67968e-22	1.76798e-19	1.09025
GO:0001568	blood vessel development	biological_process	5.30109e-22	1.94712e-19	1.30919
GO:0005581	collagen trimer	cellular_component	6.36982e-22	2.27644e-19	1.29501
GO:0005516	calmodulin binding	molecular_function	1.02494e-21	3.56653e-19	1.14409
GO:0071625	vocalization behavior	biological_process	3.19616e-21	1.08366e-18	1.31431
GO:0001077	transcriptional activator activity, RNA polymerase II proximal promoter sequence-specific DNA binding	molecular_function	3.53943e-21	1.17005e-18	1.15825
GO:0050885	neuromuscular process controlling balance	biological_process	6.25887e-21	2.01856e-18	1.27852
GO:0098793	presynapse	cellular_component	7.42368e-21	2.33722e-18	1.23414
GO:0007166	cell surface receptor signaling pathway	biological_process	1.13039e-20	3.47609e-18	1.17024
GO:0005915	zonula adherens	cellular_component	2.44174e-20	7.33799e-18	1.32808
GO:0048471	perinuclear region of cytoplasm	cellular_component	1.87141e-19	5.49905e-17	1.08695
GO:0005249	voltage-gated potassium channel activity	molecular_function	2.07456e-19	5.96345e-17	1.25501
GO:0031410	cytoplasmic vesicle	cellular_component	2.17855e-19	6.12915e-17	1.14709
GO:0007399	nervous system development	biological_process	2.55738e-19	7.04505e-17	1.12028
GO:0000977	RNA polymerase II regulatory region sequence-specific DNA binding	molecular_function	2.74874e-19	7.41766e-17	1.15857
GO:0005088	Ras guanyl-nucleotide exchange factor activity	molecular_function	3.60385e-19	9.53074e-17	1.22642
GO:0043524	negative regulation of neuron apoptotic process	biological_process	4.29904e-19	1.11463e-16	1.22158
GO:0045214	sarcomere organization	biological_process	4.4645e-19	1.13527e-16	1.30665
GO:0019901	protein kinase binding	molecular_function	8.63079e-19	2.1533e-16	1.10618
GO:0043565	sequence-specific DNA binding	molecular_function	1.47683e-18	3.61632e-16	1.11995
GO:0098609	cell-cell adhesion	biological_process	1.7064e-18	4.10251e-16	1.21415
GO:0008013	beta-catenin binding	molecular_function	2.716e-18	6.41316e-16	1.2122
GO:0003705	transcription factor activity, RNA polymerase II distal enhancer sequence-specific binding	molecular_function	3.66596e-18	8.50438e-16	1.2732
GO:0097104	postsynaptic membrane assembly	biological_process	5.12796e-18	1.16909e-15	1.31207
GO:0005667	transcription factor complex	cellular_component	9.08267e-18	2.0356e-15	1.151
GO:0030574	collagen catabolic process	biological_process	9.43176e-18	2.0786e-15	1.26218
GO:0007411	axon guidance	biological_process	1.10253e-17	2.38996e-15	1.15032
GO:0007267	cell-cell signaling	biological_process	1.12855e-17	2.4069e-15	1.1773
GO:0009952	anterior/posterior pattern specification	biological_process	1.15522e-17	2.42469e-15	1.27588
GO:0042802	identical protein binding	molecular_function	1.27166e-17	2.61547e-15	1.06771
GO:0000978	RNA polymerase II proximal promoter sequence-specific DNA binding	molecular_function	1.28568e-17	2.61547e-15	1.11633
GO:0005578	proteinaceous extracellular matrix	cellular_component	1.39521e-17	2.79527e-15	1.15042
GO:0007205	protein kinase C-activating G-protein coupled receptor signaling pathway	biological_process	4.29803e-17	8.48252e-15	1.2984
GO:0004674	protein serine/threonine kinase activity	molecular_function	4.42371e-17	8.60217e-15	1.09348
GO:0007179	transforming growth factor beta receptor signaling pathway	biological_process	5.03322e-17	9.64555e-15	1.24621
GO:0034765	regulation of ion transmembrane transport	biological_process	5.2842e-17	9.98186e-15	1.17365
GO:0045669	positive regulation of osteoblast differentiation	biological_process	5.83218e-17	1.08618e-14	1.27843
GO:0007158	neuron cell-cell adhesion	biological_process	1.06419e-16	1.95442e-14	1.28228
GO:0004713	protein tyrosine kinase activity	molecular_function	1.25366e-16	2.27084e-14	1.20049
GO:0030168	platelet activation	biological_process	1.28312e-16	2.2928e-14	1.22198
GO:0014731	spectrin-associated cytoskeleton	cellular_component	1.75899e-16	3.10121e-14	1.31071
GO:1903955	positive regulation of protein targeting to mitochondrion	biological_process	2.29341e-16	3.94989e-14	1.1939
GO:0051260	protein homooligomerization	biological_process	2.30009e-16	3.94989e-14	1.15307
GO:0033268	node of Ranvier	cellular_component	2.54533e-16	4.31499e-14	1.31859
GO:0006897	endocytosis	biological_process	3.09942e-16	5.1878e-14	1.14602
GO:0032993	protein-DNA complex	cellular_component	3.6743e-16	6.07315e-14	1.2436
GO:0097109	neuroligin family protein binding	molecular_function	5.20522e-16	8.49736e-14	1.31025
GO:0005614	interstitial matrix	cellular_component	5.8458e-16	9.42672e-14	1.31838
GO:0017158	regulation of calcium ion-dependent exocytosis	biological_process	6.09573e-16	9.7113e-14	1.28064
GO:0035176	social behavior	biological_process	7.07162e-16	1.11319e-13	1.22122
GO:0048167	regulation of synaptic plasticity	biological_process	9.07046e-16	1.41104e-13	1.26372
GO:0004842	ubiquitin-protein transferase activity	molecular_function	1.00352e-15	1.54297e-13	1.11791
GO:0043065	positive regulation of apoptotic process	biological_process	1.14063e-15	1.73363e-13	1.12172
GO:0005001	transmembrane receptor protein tyrosine phosphatase activity	molecular_function	1.5381e-15	2.31118e-13	1.30976
GO:0042475	odontogenesis of dentin-containing tooth	biological_process	1.81857e-15	2.7019e-13	1.27495
GO:0032922	circadian regulation of gene expression	biological_process	2.10895e-15	3.09852e-13	1.2794
GO:0008331	high voltage-gated calcium channel activity	molecular_function	2.81057e-15	4.08398e-13	1.32808
GO:0048365	Rac GTPase binding	molecular_function	4.82481e-15	6.93461e-13	1.27387
GO:0035257	nuclear hormone receptor binding	molecular_function	4.92682e-15	7.00509e-13	1.26543
GO:0017156	calcium ion regulated exocytosis	biological_process	5.67265e-15	7.97973e-13	1.27836
GO:0010923	negative regulation of phosphatase activity	biological_process	5.76808e-15	8.02857e-13	1.19201
GO:0051371	muscle alpha-actinin binding	molecular_function	7.06035e-15	9.7249e-13	1.3177
GO:0007420	brain development	biological_process	7.91889e-15	1.0795e-12	1.13612
GO:0005891	voltage-gated calcium channel complex	cellular_component	8.67027e-15	1.16987e-12	1.25724
GO:0097151	positive regulation of inhibitory postsynaptic potential	biological_process	1.03974e-14	1.38874e-12	1.2828
GO:0042734	presynaptic membrane	cellular_component	1.1033e-14	1.4589e-12	1.1593
GO:0060291	long-term synaptic potentiation	biological_process	1.32612e-14	1.72481e-12	1.24995
GO:0035115	embryonic forelimb morphogenesis	biological_process	1.33049e-14	1.72481e-12	1.29424
GO:0016328	lateral plasma membrane	cellular_component	1.37445e-14	1.7645e-12	1.25661
GO:0010628	positive regulation of gene expression	biological_process	1.48457e-14	1.8731e-12	1.11919
GO:0086091	regulation of heart rate by cardiac conduction	biological_process	1.48737e-14	1.8731e-12	1.2409
GO:0007165	signal transduction	biological_process	1.52437e-14	1.90159e-12	1.0643
GO:0070369	beta-catenin-TCF7L2 complex	cellular_component	1.54603e-14	1.91058e-12	1.32808
GO:0048469	cell maturation	biological_process	2.05408e-14	2.51492e-12	1.32808
GO:0007009	plasma membrane organization	biological_process	2.13316e-14	2.58778e-12	1.31736
GO:0000165	MAPK cascade	biological_process	2.53916e-14	3.0523e-12	1.13644
GO:0031290	retinal ganglion cell axon guidance	biological_process	2.81192e-14	3.29045e-12	1.31728
GO:0090129	positive regulation of synapse maturation	biological_process	2.81192e-14	3.29045e-12	1.31728
GO:0097119	postsynaptic density protein 95 clustering	biological_process	2.81192e-14	3.29045e-12	1.31728
GO:0051965	positive regulation of synapse assembly	biological_process	3.13449e-14	3.63574e-12	1.20346
GO:0003714	transcription corepressor activity	molecular_function	3.3697e-14	3.87456e-12	1.13071
GO:0045296	cadherin binding	molecular_function	3.42357e-14	3.90258e-12	1.10812
GO:0001958	endochondral ossification	biological_process	3.62585e-14	4.0631e-12	1.32808
GO:0086045	membrane depolarization during AV node cell action potential	biological_process	3.62585e-14	4.0631e-12	1.32808
GO:0007626	locomotory behavior	biological_process	4.50502e-14	5.00587e-12	1.22663
GO:0046834	lipid phosphorylation	biological_process	4.8173e-14	5.30826e-12	1.32808
GO:0017124	SH3 domain binding	molecular_function	5.58478e-14	6.1031e-12	1.14617
GO:0004143	diacylglycerol kinase activity	molecular_function	6.43822e-14	6.97808e-12	1.31701
GO:0070888	E-box binding	molecular_function	6.62914e-14	7.12659e-12	1.24437
GO:0030159	receptor signaling complex scaffold activity	molecular_function	6.73651e-14	7.18362e-12	1.3078
GO:0001078	transcriptional repressor activity, RNA polymerase II proximal promoter sequence-specific DNA binding	molecular_function	7.375e-14	7.80157e-12	1.16466
GO:0016324	apical plasma membrane	cellular_component	7.54371e-14	7.9167e-12	1.10915
GO:0003712	transcription cofactor activity	molecular_function	8.5119e-14	8.86243e-12	1.19595
GO:1900029	positive regulation of ruffle assembly	biological_process	8.81713e-14	9.1085e-12	1.30764
GO:0044212	transcription regulatory region DNA binding	molecular_function	9.4633e-14	9.70025e-12	1.1227
GO:0043621	protein self-association	molecular_function	1.05164e-13	1.06968e-11	1.26134
GO:0030018	Z disc	cellular_component	1.14824e-13	1.15903e-11	1.137
GO:0008654	phospholipid biosynthetic process	biological_process	1.36017e-13	1.36254e-11	1.29218
GO:0030295	protein kinase activator activity	molecular_function	1.40517e-13	1.39704e-11	1.26517
GO:0007266	Rho protein signal transduction	biological_process	1.42249e-13	1.4037e-11	1.22238
GO:0005905	clathrin-coated pit	cellular_component	1.568e-13	1.53583e-11	1.21596
GO:0097118	neuroligin clustering involved in postsynaptic membrane assembly	biological_process	1.94099e-13	1.88718e-11	1.31663
GO:0051968	positive regulation of synaptic transmission, glutamatergic	biological_process	1.97558e-13	1.90679e-11	1.30716
GO:0005776	autophagosome	cellular_component	2.21251e-13	2.12e-11	1.2115
GO:0071889	14-3-3 protein binding	molecular_function	2.42277e-13	2.30477e-11	1.25611
GO:0000122	negative regulation of transcription from RNA polymerase II promoter	biological_process	2.46934e-13	2.3323e-11	1.07004
GO:0101003	ficolin-1-rich granule membrane	cellular_component	2.85221e-13	2.6748e-11	1.22335
GO:0031095	platelet dense tubular network membrane	cellular_component	3.51978e-13	3.27761e-11	1.32808
GO:0051056	regulation of small GTPase mediated signal transduction	biological_process	3.86541e-13	3.57429e-11	1.12793
GO:0007507	heart development	biological_process	4.03182e-13	3.70227e-11	1.14561
GO:0090630	activation of GTPase activity	biological_process	4.50034e-13	4.104e-11	1.1475
GO:0043034	costamere	cellular_component	6.35535e-13	5.75595e-11	1.29066
GO:0008360	regulation of cell shape	biological_process	7.47741e-13	6.72611e-11	1.13961
GO:0045197	establishment or maintenance of epithelial cell apical/basal polarity	biological_process	7.56072e-13	6.7551e-11	1.3063
GO:0009898	cytoplasmic side of plasma membrane	cellular_component	9.08259e-13	8.06034e-11	1.23688
GO:0033613	activating transcription factor binding	molecular_function	9.26662e-13	8.16884e-11	1.2624
GO:0050796	regulation of insulin secretion	biological_process	1.0554e-12	9.24213e-11	1.19241
GO:0071498	cellular response to fluid shear stress	biological_process	1.45682e-12	1.26733e-10	1.32808
GO:0001228	transcriptional activator activity, RNA polymerase II transcription regulatory region sequence-specific DNA binding	molecular_function	1.58572e-12	1.37045e-10	1.16925
GO:0046983	protein dimerization activity	molecular_function	1.84198e-12	1.58159e-10	1.14642
GO:0006357	regulation of transcription from RNA polymerase II promoter	biological_process	1.86912e-12	1.5863e-10	1.09938
GO:0050808	synapse organization	biological_process	1.87145e-12	1.5863e-10	1.2613
GO:0003951	NAD+ kinase activity	molecular_function	1.99663e-12	1.68162e-10	1.27104
GO:0017137	Rab GTPase binding	molecular_function	2.09568e-12	1.75388e-10	1.11509
GO:0048704	embryonic skeletal system morphogenesis	biological_process	2.13041e-12	1.77172e-10	1.24507
GO:0043647	inositol phosphate metabolic process	biological_process	2.15586e-12	1.78169e-10	1.19681
GO:0016055	Wnt signaling pathway	biological_process	2.25865e-12	1.85504e-10	1.1275
GO:0030073	insulin secretion	biological_process	2.36421e-12	1.92975e-10	1.26093
GO:0050839	cell adhesion molecule binding	molecular_function	2.90524e-12	2.35681e-10	1.18628
GO:0004385	guanylate kinase activity	molecular_function	2.94855e-12	2.37736e-10	1.28901
GO:0031016	pancreas development	biological_process	3.04671e-12	2.44162e-10	1.31555
GO:0001654	eye development	biological_process	3.11382e-12	2.48036e-10	1.27599
GO:0000423	mitophagy	biological_process	4.53824e-12	3.57197e-10	1.32808
GO:0098780	response to mitochondrial depolarisation	biological_process	4.53824e-12	3.57197e-10	1.32808
GO:0048488	synaptic vesicle endocytosis	biological_process	4.68963e-12	3.66929e-10	1.25119
GO:0048013	ephrin receptor signaling pathway	biological_process	5.26378e-12	4.09429e-10	1.19043
GO:0001558	regulation of cell growth	biological_process	5.3188e-12	4.11289e-10	1.21998
GO:0042169	SH2 domain binding	molecular_function	6.00415e-12	4.61586e-10	1.25938
GO:0031430	M band	cellular_component	6.41174e-12	4.90072e-10	1.24303
GO:0019903	protein phosphatase binding	molecular_function	7.34204e-12	5.57953e-10	1.20078
GO:0000981	RNA polymerase II transcription factor activity, sequence-specific DNA binding	molecular_function	7.68241e-12	5.80483e-10	1.13835
GO:0007416	synapse assembly	biological_process	9.04899e-12	6.77183e-10	1.19069
GO:0031234	extrinsic component of cytoplasmic side of plasma membrane	cellular_component	9.06462e-12	6.77183e-10	1.17025
GO:0016339	calcium-dependent cell-cell adhesion via plasma membrane cell adhesion molecules	biological_process	9.14371e-12	6.79254e-10	1.31505
GO:0003682	chromatin binding	molecular_function	9.30627e-12	6.87468e-10	1.08869
GO:0035585	calcium-mediated signaling using extracellular calcium source	biological_process	1.0641e-11	7.81701e-10	1.32808
GO:0060070	canonical Wnt signaling pathway	biological_process	1.17501e-11	8.58408e-10	1.22337
GO:0007173	epidermal growth factor receptor signaling pathway	biological_process	1.53907e-11	1.1182e-09	1.24132
GO:0008022	protein C-terminus binding	molecular_function	1.71799e-11	1.24137e-09	1.11153
GO:0005788	endoplasmic reticulum lumen	cellular_component	1.78655e-11	1.28389e-09	1.11771
GO:1990316	Atg1/ULK1 kinase complex	cellular_component	1.87804e-11	1.34234e-09	1.32808
GO:0007623	circadian rhythm	biological_process	1.92002e-11	1.36497e-09	1.21483
GO:0007229	integrin-mediated signaling pathway	biological_process	1.95954e-11	1.38561e-09	1.17372
GO:0005245	voltage-gated calcium channel activity	molecular_function	2.19141e-11	1.54133e-09	1.2306
GO:0030178	negative regulation of Wnt signaling pathway	biological_process	2.25412e-11	1.56875e-09	1.28657
GO:0033137	negative regulation of peptidyl-serine phosphorylation	biological_process	2.25412e-11	1.56875e-09	1.28657
GO:0008154	actin polymerization or depolymerization	biological_process	2.43777e-11	1.68768e-09	1.30371
GO:0009268	response to pH	biological_process	2.49496e-11	1.70056e-09	1.32808
GO:0030955	potassium ion binding	molecular_function	2.49496e-11	1.70056e-09	1.32808
GO:2001223	negative regulation of neuron migration	biological_process	2.49496e-11	1.70056e-09	1.32808
GO:0048010	vascular endothelial growth factor receptor signaling pathway	biological_process	2.70226e-11	1.83241e-09	1.23015
GO:0001934	positive regulation of protein phosphorylation	biological_process	2.81797e-11	1.8999e-09	1.17747
GO:0043194	axon initial segment	cellular_component	2.83053e-11	1.8999e-09	1.24781
GO:0043204	perikaryon	cellular_component	3.29783e-11	2.20239e-09	1.14687
GO:0010812	negative regulation of cell-substrate adhesion	biological_process	3.31453e-11	2.20241e-09	1.32808
GO:0008093	cytoskeletal adaptor activity	molecular_function	3.6042e-11	2.38291e-09	1.31438
GO:0070491	repressing transcription factor binding	molecular_function	3.7988e-11	2.49908e-09	1.19883
GO:0030335	positive regulation of cell migration	biological_process	3.82372e-11	2.50302e-09	1.14848
GO:0048666	neuron development	biological_process	4.09676e-11	2.66855e-09	1.20646
GO:0090303	positive regulation of wound healing	biological_process	4.15006e-11	2.68185e-09	1.30325
GO:0030665	clathrin-coated vesicle membrane	cellular_component	4.17804e-11	2.68185e-09	1.25131
GO:0070507	regulation of microtubule cytoskeleton organization	biological_process	4.17804e-11	2.68185e-09	1.25131
GO:0043149	stress fiber assembly	biological_process	4.30586e-11	2.75055e-09	1.27852
GO:0030426	growth cone	cellular_component	4.39119e-11	2.78587e-09	1.13924
GO:0006476	protein deacetylation	biological_process	4.40329e-11	2.78587e-09	1.32808
GO:0016082	synaptic vesicle priming	biological_process	4.49822e-11	2.83238e-09	1.2661
GO:0007409	axonogenesis	biological_process	4.52896e-11	2.83822e-09	1.16279
GO:0018105	peptidyl-serine phosphorylation	biological_process	5.11302e-11	3.18913e-09	1.11807
GO:0006182	cGMP biosynthetic process	biological_process	5.41346e-11	3.36066e-09	1.30302
GO:0042476	odontogenesis	biological_process	5.51274e-11	3.40631e-09	1.27815
GO:0060348	bone development	biological_process	5.55102e-11	3.41401e-09	1.23511
GO:0086015	SA node cell action potential	biological_process	5.84967e-11	3.58103e-09	1.32808
GO:0030220	platelet formation	biological_process	7.06025e-11	4.3022e-09	1.30278
GO:0008021	synaptic vesicle	cellular_component	7.61122e-11	4.61666e-09	1.15326
GO:0014047	glutamate secretion	biological_process	7.6706e-11	4.63143e-09	1.20092
GO:0045055	regulated exocytosis	biological_process	7.97512e-11	4.79341e-09	1.28489
GO:0097116	gephyrin clustering involved in postsynaptic density assembly	biological_process	8.1976e-11	4.90484e-09	1.31395
GO:0042297	vocal learning	biological_process	9.20639e-11	5.48361e-09	1.30254
GO:0036309	protein localization to M-band	biological_process	1.03237e-10	6.12153e-09	1.32808
GO:0002062	chondrocyte differentiation	biological_process	1.07358e-10	6.31581e-09	1.25908
GO:0030968	endoplasmic reticulum unfolded protein response	biological_process	1.07469e-10	6.31581e-09	1.24507
GO:0043195	terminal bouton	cellular_component	1.11115e-10	6.50122e-09	1.20001
GO:0046903	secretion	biological_process	1.20027e-10	6.99173e-09	1.30229
GO:0007160	cell-matrix adhesion	biological_process	1.2871e-10	7.46461e-09	1.15277
GO:0045595	regulation of cell differentiation	biological_process	1.31966e-10	7.62005e-09	1.28417
GO:0004714	transmembrane receptor protein tyrosine kinase activity	molecular_function	1.37146e-10	7.7832e-09	1.32808
GO:0030122	AP-2 adaptor complex	cellular_component	1.37146e-10	7.7832e-09	1.32808
GO:0046486	glycerolipid metabolic process	biological_process	1.37146e-10	7.7832e-09	1.32808
GO:2001259	positive regulation of cation channel activity	biological_process	1.37146e-10	7.7832e-09	1.32808
GO:0070300	phosphatidic acid binding	molecular_function	1.52072e-10	8.59335e-09	1.26991
GO:0017015	regulation of transforming growth factor beta receptor signaling pathway	biological_process	1.56456e-10	8.80349e-09	1.30203
GO:0007611	learning or memory	biological_process	1.61378e-10	9.04195e-09	1.22306
GO:0006461	protein complex assembly	biological_process	2.32122e-10	1.29509e-08	1.13651
GO:0005518	collagen binding	molecular_function	2.40306e-10	1.33511e-08	1.21642
GO:0072102	glomerulus morphogenesis	biological_process	2.42035e-10	1.33909e-08	1.32808
GO:0031209	SCAR complex	cellular_component	2.44823e-10	1.34887e-08	1.31332
GO:0001933	negative regulation of protein phosphorylation	biological_process	2.64456e-10	1.44576e-08	1.22492
GO:0004383	guanylate cyclase activity	molecular_function	2.65688e-10	1.44576e-08	1.30151
GO:0008074	guanylate cyclase complex, soluble	cellular_component	2.65688e-10	1.44576e-08	1.30151
GO:0030520	intracellular estrogen receptor signaling pathway	biological_process	2.94407e-10	1.59547e-08	1.29152
GO:0070059	intrinsic apoptotic signaling pathway in response to endoplasmic reticulum stress	biological_process	3.12596e-10	1.68712e-08	1.26861
GO:0030049	muscle filament sliding	biological_process	3.15352e-10	1.69508e-08	1.2471
GO:0086056	voltage-gated calcium channel activity involved in AV node cell action potential	molecular_function	3.21531e-10	1.71552e-08	1.32808
GO:0005640	nuclear outer membrane	cellular_component	3.21748e-10	1.71552e-08	1.31315
GO:0018108	peptidyl-tyrosine phosphorylation	biological_process	3.27942e-10	1.74152e-08	1.21842
GO:0004683	calmodulin-dependent protein kinase activity	molecular_function	3.30811e-10	1.74973e-08	1.19923
GO:0031012	extracellular matrix	cellular_component	3.54934e-10	1.86984e-08	1.1259
GO:0001540	amyloid-beta binding	molecular_function	3.69003e-10	1.93624e-08	1.2054
GO:0002931	response to ischemia	biological_process	3.80681e-10	1.98962e-08	1.29118
GO:0010801	negative regulation of peptidyl-threonine phosphorylation	biological_process	4.92113e-10	2.5619e-08	1.29084
GO:0045211	postsynaptic membrane	cellular_component	5.04942e-10	2.61837e-08	1.09014
GO:0042493	response to drug	biological_process	5.40799e-10	2.79335e-08	1.14919
GO:0032266	phosphatidylinositol-3-phosphate binding	molecular_function	5.54497e-10	2.85296e-08	1.20209
GO:0035413	positive regulation of catenin import into nucleus	biological_process	5.67423e-10	2.90815e-08	1.32808
GO:0043005	neuron projection	cellular_component	5.85048e-10	2.98691e-08	1.09299
GO:0005876	spindle microtubule	cellular_component	5.96566e-10	3.02237e-08	1.21689
GO:0030534	adult behavior	biological_process	5.96566e-10	3.02237e-08	1.21689
GO:0071260	cellular response to mechanical stimulus	biological_process	6.02464e-10	3.04061e-08	1.26119
GO:0009986	cell surface	cellular_component	6.8414e-10	3.43208e-08	1.07726
GO:0042826	histone deacetylase binding	molecular_function	6.85222e-10	3.43208e-08	1.14935
GO:0001085	RNA polymerase II transcription factor binding	molecular_function	6.99188e-10	3.48882e-08	1.22918
GO:0090394	negative regulation of excitatory postsynaptic potential	biological_process	7.29774e-10	3.62774e-08	1.31263
GO:0043507	positive regulation of JUN kinase activity	biological_process	7.62498e-10	3.77622e-08	1.28148
GO:0030182	neuron differentiation	biological_process	8.83924e-10	4.36124e-08	1.14427
GO:0004871	signal transducer activity	molecular_function	8.88317e-10	4.36662e-08	1.10432
GO:0048260	positive regulation of receptor-mediated endocytosis	biological_process	9.58593e-10	4.6773e-08	1.31245
GO:0098911	regulation of ventricular cardiac muscle cell action potential	biological_process	9.58593e-10	4.6773e-08	1.31245
GO:0044224	juxtaparanode region of axon	cellular_component	9.78494e-10	4.75685e-08	1.28106
GO:0000900	translation repressor activity, nucleic acid binding	molecular_function	9.95004e-10	4.7974e-08	1.30012
GO:0006970	response to osmotic stress	biological_process	9.95004e-10	4.7974e-08	1.30012
GO:0000983	transcription factor activity, RNA polymerase II core promoter sequence-specific DNA binding	molecular_function	1.00135e-09	4.7974e-08	1.32808
GO:2000507	positive regulation of energy homeostasis	biological_process	1.00135e-09	4.7974e-08	1.32808
GO:0021987	cerebral cortex development	biological_process	1.014e-09	4.84047e-08	1.21002
GO:0007186	G-protein coupled receptor signaling pathway	biological_process	1.0304e-09	4.90109e-08	1.07317
GO:0045599	negative regulation of fat cell differentiation	biological_process	1.17388e-09	5.56354e-08	1.23542
GO:0004111	creatine kinase activity	molecular_function	1.33021e-09	6.25958e-08	1.32808
GO:0010632	regulation of epithelial cell migration	biological_process	1.33021e-09	6.25958e-08	1.32808
GO:0016477	cell migration	biological_process	1.42712e-09	6.69176e-08	1.1028
GO:0006468	protein phosphorylation	biological_process	1.53566e-09	7.17526e-08	1.07641
GO:0048675	axon extension	biological_process	1.60989e-09	7.49564e-08	1.28022
GO:0005622	intracellular	cellular_component	1.61623e-09	7.49874e-08	1.06346
GO:0030659	cytoplasmic vesicle membrane	cellular_component	1.68394e-09	7.7628e-08	1.12259
GO:0019838	growth factor binding	molecular_function	1.68489e-09	7.7628e-08	1.29951
GO:0017146	NMDA selective glutamate receptor complex	cellular_component	1.76708e-09	8.0296e-08	1.32808
GO:0065004	protein-DNA complex assembly	biological_process	1.76708e-09	8.0296e-08	1.32808
GO:0098912	membrane depolarization during atrial cardiac muscle cell action potential	biological_process	1.76708e-09	8.0296e-08	1.32808
GO:2001013	epithelial cell proliferation involved in renal tubule morphogenesis	biological_process	1.76708e-09	8.0296e-08	1.32808
GO:0001843	neural tube closure	biological_process	1.7806e-09	8.06332e-08	1.16121
GO:0017048	Rho GTPase binding	molecular_function	1.85351e-09	8.36483e-08	1.24294
GO:0070064	proline-rich region binding	molecular_function	1.95245e-09	8.78135e-08	1.2137
GO:0003007	heart morphogenesis	biological_process	2.06401e-09	9.25165e-08	1.27978
GO:0003785	actin monomer binding	molecular_function	2.13346e-09	9.53064e-08	1.25272
GO:0010629	negative regulation of gene expression	biological_process	2.15375e-09	9.53643e-08	1.1373
GO:0005388	calcium-transporting ATPase activity	molecular_function	2.16441e-09	9.53643e-08	1.2718
GO:0031581	hemidesmosome assembly	biological_process	2.17081e-09	9.53643e-08	1.31188
GO:0097105	presynaptic membrane assembly	biological_process	2.17081e-09	9.53643e-08	1.31188
GO:2000310	regulation of NMDA receptor activity	biological_process	2.17081e-09	9.53643e-08	1.31188
GO:0016581	NuRD complex	cellular_component	2.34742e-09	1.02442e-07	1.32808
GO:0050682	AF-2 domain binding	molecular_function	2.34742e-09	1.02442e-07	1.32808
GO:0070577	lysine-acetylated histone binding	molecular_function	2.43654e-09	1.05981e-07	1.25818
GO:0016601	Rac protein signal transduction	biological_process	2.66549e-09	1.1556e-07	1.26433
GO:0061337	cardiac conduction	biological_process	2.67698e-09	1.15679e-07	1.18412
GO:0045879	negative regulation of smoothened signaling pathway	biological_process	2.85056e-09	1.22778e-07	1.29889
GO:0010172	embryonic body morphogenesis	biological_process	3.11833e-09	1.33012e-07	1.32808
GO:0040001	establishment of mitotic spindle localization	biological_process	3.11833e-09	1.33012e-07	1.32808
GO:0061333	renal tubule morphogenesis	biological_process	3.11833e-09	1.33012e-07	1.32808
GO:0006898	receptor-mediated endocytosis	biological_process	3.16199e-09	1.3444e-07	1.16886
GO:0071277	cellular response to calcium ion	biological_process	3.28849e-09	1.39371e-07	1.16162
GO:0016020	membrane	cellular_component	3.32913e-09	1.40642e-07	1.03275
GO:0006939	smooth muscle contraction	biological_process	3.87001e-09	1.62972e-07	1.25711
GO:0043425	bHLH transcription factor binding	molecular_function	4.20146e-09	1.76368e-07	1.23207
GO:0045295	gamma-catenin binding	molecular_function	4.27436e-09	1.7886e-07	1.26329
GO:0086010	membrane depolarization during action potential	biological_process	4.49915e-09	1.87209e-07	1.2174
GO:0031093	platelet alpha granule lumen	cellular_component	4.50218e-09	1.87209e-07	1.20849
GO:0007043	cell-cell junction assembly	biological_process	4.81824e-09	1.99723e-07	1.29823
GO:0006366	transcription from RNA polymerase II promoter	biological_process	4.87331e-09	2.01375e-07	1.09468
GO:0016032	viral process	biological_process	5.85948e-09	2.41371e-07	1.09148
GO:0043410	positive regulation of MAPK cascade	biological_process	6.05533e-09	2.48663e-07	1.19311
GO:2000300	regulation of synaptic vesicle exocytosis	biological_process	6.13517e-09	2.50456e-07	1.21981
GO:0045786	negative regulation of cell cycle	biological_process	6.13687e-09	2.50456e-07	1.25601
GO:0007628	adult walking behavior	biological_process	7.11431e-09	2.89454e-07	1.27748
GO:0090136	epithelial cell-cell adhesion	biological_process	7.23415e-09	2.93427e-07	1.26931
GO:0031013	troponin I binding	molecular_function	7.30985e-09	2.93794e-07	1.32808
GO:0043395	heparan sulfate proteoglycan binding	molecular_function	7.30985e-09	2.93794e-07	1.32808
GO:0072160	nephron tubule epithelial cell differentiation	biological_process	7.30985e-09	2.93794e-07	1.32808
GO:0032230	positive regulation of synaptic transmission, GABAergic	biological_process	8.13632e-09	3.2602e-07	1.29754
GO:1904837	beta-catenin-TCF complex assembly	biological_process	8.16724e-09	3.2627e-07	1.21565
GO:2000601	positive regulation of Arp2/3 complex-mediated actin nucleation	biological_process	8.45309e-09	3.36672e-07	1.31083
GO:0050772	positive regulation of axonogenesis	biological_process	9.19832e-09	3.65253e-07	1.26879
GO:0005337	nucleoside transmembrane transporter activity	molecular_function	9.71033e-09	3.79881e-07	1.32808
GO:0061002	negative regulation of dendritic spine morphogenesis	biological_process	9.71033e-09	3.79881e-07	1.32808
GO:0086007	voltage-gated calcium channel activity involved in cardiac muscle cell action potential	molecular_function	9.71033e-09	3.79881e-07	1.32808
GO:0097493	structural molecule activity conferring elasticity	molecular_function	9.71033e-09	3.79881e-07	1.32808
GO:2001269	positive regulation of cysteine-type endopeptidase activity involved in apoptotic signaling pathway	biological_process	9.71033e-09	3.79881e-07	1.32808
GO:0051592	response to calcium ion	biological_process	1.03821e-08	4.04964e-07	1.19822
GO:0045766	positive regulation of angiogenesis	biological_process	1.04541e-08	4.06572e-07	1.17998
GO:0010385	double-stranded methylated DNA binding	molecular_function	1.0569e-08	4.09836e-07	1.29719
GO:0050804	modulation of chemical synaptic transmission	biological_process	1.11427e-08	4.30818e-07	1.22531
GO:0032947	protein complex scaffold activity	molecular_function	1.20665e-08	4.65176e-07	1.20279
GO:0045892	negative regulation of transcription, DNA-templated	biological_process	1.22219e-08	4.69795e-07	1.06556
GO:0006941	striated muscle contraction	biological_process	1.29903e-08	4.97886e-07	1.24819
GO:0010761	fibroblast migration	biological_process	1.38223e-08	5.28243e-07	1.26055
GO:0005543	phospholipid binding	molecular_function	1.42411e-08	5.42681e-07	1.15012
GO:0005102	receptor binding	molecular_function	1.44539e-08	5.49208e-07	1.08585
GO:0005783	endoplasmic reticulum	cellular_component	1.48985e-08	5.64478e-07	1.04937
GO:0055038	recycling endosome membrane	cellular_component	1.60731e-08	6.07241e-07	1.16786
GO:0051233	spindle midzone	cellular_component	1.62492e-08	6.12147e-07	1.24759
GO:0030336	negative regulation of cell migration	biological_process	1.70502e-08	6.4004e-07	1.13151
GO:0010694	positive regulation of alkaline phosphatase activity	biological_process	1.71349e-08	6.4004e-07	1.32808
GO:2000809	positive regulation of synaptic vesicle clustering	biological_process	1.71349e-08	6.4004e-07	1.32808
GO:0006470	protein dephosphorylation	biological_process	1.75525e-08	6.53794e-07	1.13022
GO:0035418	protein localization to synapse	biological_process	1.78201e-08	6.60042e-07	1.29645
GO:2000179	positive regulation of neural precursor cell proliferation	biological_process	1.78201e-08	6.60042e-07	1.29645
GO:0003091	renal water homeostasis	biological_process	1.88644e-08	6.96772e-07	1.26715
GO:0051899	membrane depolarization	biological_process	1.90252e-08	7.00755e-07	1.27548
GO:0031532	actin cytoskeleton reorganization	biological_process	2.0456e-08	7.5136e-07	1.15829
GO:0007190	activation of adenylate cyclase activity	biological_process	2.06002e-08	7.5456e-07	1.24146
GO:0042060	wound healing	biological_process	2.18574e-08	7.98401e-07	1.21259
GO:0048311	mitochondrion distribution	biological_process	2.31299e-08	8.38442e-07	1.29607
GO:0099560	synaptic membrane adhesion	biological_process	2.31299e-08	8.38442e-07	1.29607
GO:0035556	intracellular signal transduction	biological_process	2.31439e-08	8.38442e-07	1.0595
GO:0045746	negative regulation of Notch signaling pathway	biological_process	2.39789e-08	8.63958e-07	1.23133
GO:0048026	positive regulation of mRNA splicing, via spliceosome	biological_process	2.39789e-08	8.63958e-07	1.23133
GO:0048703	embryonic viscerocranium morphogenesis	biological_process	2.43066e-08	8.71021e-07	1.27495
GO:0051928	positive regulation of calcium ion transport	biological_process	2.43066e-08	8.71021e-07	1.27495
GO:2001016	positive regulation of skeletal muscle cell differentiation	biological_process	2.50086e-08	8.93754e-07	1.30988
GO:0005070	SH3/SH2 adaptor activity	molecular_function	2.6089e-08	9.29851e-07	1.16107
GO:0051015	actin filament binding	molecular_function	2.7333e-08	9.7157e-07	1.09925
GO:0034199	activation of protein kinase A activity	biological_process	3.00135e-08	1.06115e-06	1.29568
GO:0071380	cellular response to prostaglandin E stimulus	biological_process	3.00135e-08	1.06115e-06	1.29568
GO:0017154	semaphorin receptor activity	molecular_function	3.02357e-08	1.06332e-06	1.32808
GO:0031256	leading edge membrane	cellular_component	3.02357e-08	1.06332e-06	1.32808
GO:0016079	synaptic vesicle exocytosis	biological_process	3.10081e-08	1.08759e-06	1.22216
GO:0045177	apical part of cell	cellular_component	3.20437e-08	1.12094e-06	1.15683
GO:0007346	regulation of mitotic cell cycle	biological_process	3.24088e-08	1.13072e-06	1.12899
GO:0048813	dendrite morphogenesis	biological_process	3.28149e-08	1.14187e-06	1.16417
GO:0001764	neuron migration	biological_process	3.31162e-08	1.14833e-06	1.12775
GO:0030308	negative regulation of cell growth	biological_process	3.31742e-08	1.14833e-06	1.13753
GO:0030374	ligand-dependent nuclear receptor transcription coactivator activity	molecular_function	3.35341e-08	1.15776e-06	1.17129
GO:0015758	glucose transport	biological_process	3.65169e-08	1.25746e-06	1.23003
GO:0030032	lamellipodium assembly	biological_process	3.76506e-08	1.29313e-06	1.1741
GO:0010038	response to metal ion	biological_process	3.89348e-08	1.33032e-06	1.29528
GO:0045725	positive regulation of glycogen biosynthetic process	biological_process	3.89348e-08	1.33032e-06	1.29528
GO:0070016	armadillo repeat domain binding	molecular_function	3.96284e-08	1.35053e-06	1.27387
GO:0071688	striated muscle myosin thick filament assembly	biological_process	4.01641e-08	1.35829e-06	1.32808
GO:0090527	actin filament reorganization	biological_process	4.01641e-08	1.35829e-06	1.32808
GO:1990391	DNA repair complex	cellular_component	4.01641e-08	1.35829e-06	1.32808
GO:0043268	positive regulation of potassium ion transport	biological_process	4.29709e-08	1.4495e-06	1.30937
GO:0005095	GTPase inhibitor activity	molecular_function	4.4226e-08	1.48804e-06	1.25756
GO:0050767	regulation of neurogenesis	biological_process	4.76492e-08	1.5953e-06	1.28331
GO:0001103	RNA polymerase II repressing transcription factor binding	molecular_function	4.76551e-08	1.5953e-06	1.23389
GO:0036064	ciliary basal body	cellular_component	4.84125e-08	1.61656e-06	1.10148
GO:0019870	potassium channel inhibitor activity	molecular_function	5.04933e-08	1.6818e-06	1.29487
GO:0001947	heart looping	biological_process	5.26711e-08	1.74624e-06	1.19048
GO:0001093	TFIIB-class transcription factor binding	molecular_function	5.33524e-08	1.74624e-06	1.32808
GO:0005924	cell-substrate adherens junction	cellular_component	5.33524e-08	1.74624e-06	1.32808
GO:0006449	regulation of translational termination	biological_process	5.33524e-08	1.74624e-06	1.32808
GO:0016342	catenin complex	cellular_component	5.33524e-08	1.74624e-06	1.32808
GO:0030953	astral microtubule organization	biological_process	5.33524e-08	1.74624e-06	1.32808
GO:0086046	membrane depolarization during SA node cell action potential	biological_process	5.33524e-08	1.74624e-06	1.32808
GO:0030057	desmosome	cellular_component	5.99479e-08	1.95726e-06	1.24995
GO:0006887	exocytosis	biological_process	6.10989e-08	1.98993e-06	1.13707
GO:0007612	learning	biological_process	6.13964e-08	1.99471e-06	1.15353
GO:0017022	myosin binding	molecular_function	6.16362e-08	1.99759e-06	1.24375
GO:0005158	insulin receptor binding	molecular_function	6.19327e-08	2.00229e-06	1.26423
GO:0010507	negative regulation of autophagy	biological_process	6.41287e-08	2.0632e-06	1.19463
GO:0010811	positive regulation of cell-substrate adhesion	biological_process	6.41287e-08	2.0632e-06	1.19463
GO:0007520	myoblast fusion	biological_process	7.02001e-08	2.24731e-06	1.25629
GO:0042417	dopamine metabolic process	biological_process	7.0871e-08	2.24731e-06	1.32808
GO:0048625	myoblast fate commitment	biological_process	7.0871e-08	2.24731e-06	1.32808
GO:0071205	protein localization to juxtaparanode region of axon	biological_process	7.0871e-08	2.24731e-06	1.32808
GO:1901799	negative regulation of proteasomal protein catabolic process	biological_process	7.0871e-08	2.24731e-06	1.32808
GO:1990869	cellular response to chemokine	biological_process	7.0871e-08	2.24731e-06	1.32808
GO:0098815	modulation of excitatory postsynaptic potential	biological_process	7.37794e-08	2.33394e-06	1.30883
GO:0051017	actin filament bundle assembly	biological_process	7.6887e-08	2.42644e-06	1.19658
GO:0052629	phosphatidylinositol-3,5-bisphosphate 3-phosphatase activity	molecular_function	7.84519e-08	2.46993e-06	1.26361
GO:0032332	positive regulation of chondrocyte differentiation	biological_process	8.48472e-08	2.65861e-06	1.29402
GO:0035050	embryonic heart tube development	biological_process	8.48472e-08	2.65861e-06	1.29402
GO:0005547	phosphatidylinositol-3,4,5-trisphosphate binding	molecular_function	8.94938e-08	2.79758e-06	1.17813
GO:0022617	extracellular matrix disassembly	biological_process	9.00535e-08	2.80844e-06	1.23184
GO:0051491	positive regulation of filopodium assembly	biological_process	9.35709e-08	2.90171e-06	1.1799
GO:0001011	transcription factor activity, sequence-specific DNA binding, RNA polymerase recruiting	molecular_function	9.41416e-08	2.90171e-06	1.32808
GO:0001087	transcription factor activity, TFIIB-class binding	molecular_function	9.41416e-08	2.90171e-06	1.32808
GO:0035720	intraciliary anterograde transport	biological_process	9.41416e-08	2.90171e-06	1.32808
GO:0060371	regulation of atrial cardiac muscle cell membrane depolarization	biological_process	9.41416e-08	2.90171e-06	1.32808
GO:0002039	p53 binding	molecular_function	9.63016e-08	2.96139e-06	1.16045
GO:0030206	chondroitin sulfate biosynthetic process	biological_process	9.66472e-08	2.96512e-06	1.30854
GO:0060077	inhibitory synapse	cellular_component	1.0482e-07	3.20841e-06	1.27156
GO:0008104	protein localization	biological_process	1.09833e-07	3.34179e-06	1.15151
GO:0030056	hemidesmosome	cellular_component	1.09936e-07	3.34179e-06	1.29358
GO:0030837	negative regulation of actin filament polymerization	biological_process	1.09936e-07	3.34179e-06	1.29358
GO:0001102	RNA polymerase II activating transcription factor binding	molecular_function	1.11218e-07	3.37303e-06	1.23114
GO:0086002	cardiac muscle cell action potential involved in contraction	biological_process	1.16079e-07	3.51239e-06	1.22183
GO:0043393	regulation of protein binding	biological_process	1.17688e-07	3.55294e-06	1.24793
GO:0030172	troponin C binding	molecular_function	1.25053e-07	3.73267e-06	1.32808
GO:0031402	sodium ion binding	molecular_function	1.25053e-07	3.73267e-06	1.32808
GO:0045218	zonula adherens maintenance	biological_process	1.25053e-07	3.73267e-06	1.32808
GO:1901750	leukotriene D4 biosynthetic process	biological_process	1.25053e-07	3.73267e-06	1.32808
GO:1903799	negative regulation of production of miRNAs involved in gene silencing by miRNA	biological_process	1.25053e-07	3.73267e-06	1.32808
GO:1901385	regulation of voltage-gated calcium channel activity	biological_process	1.26577e-07	3.76119e-06	1.30825
GO:1903758	negative regulation of transcription from RNA polymerase II promoter by histone modification	biological_process	1.26577e-07	3.76119e-06	1.30825
GO:0035987	endodermal cell differentiation	biological_process	1.29738e-07	3.84646e-06	1.2812
GO:0006919	activation of cysteine-type endopeptidase activity involved in apoptotic process	biological_process	1.32706e-07	3.92567e-06	1.1946
GO:0005123	death receptor binding	molecular_function	1.33533e-07	3.9413e-06	1.27095
GO:0032483	regulation of Rab protein signal transduction	biological_process	1.39882e-07	4.1195e-06	1.25429
GO:0050680	negative regulation of epithelial cell proliferation	biological_process	1.55005e-07	4.55475e-06	1.18894
GO:0046847	filopodium assembly	biological_process	1.59016e-07	4.66224e-06	1.26167
GO:0002076	osteoblast development	biological_process	1.66113e-07	4.73385e-06	1.32808
GO:0006884	cell volume homeostasis	biological_process	1.66113e-07	4.73385e-06	1.32808
GO:0030194	positive regulation of blood coagulation	biological_process	1.66113e-07	4.73385e-06	1.32808
GO:0031103	axon regeneration	biological_process	1.66113e-07	4.73385e-06	1.32808
GO:0031301	integral component of organelle membrane	cellular_component	1.66113e-07	4.73385e-06	1.32808
GO:0031681	G-protein beta-subunit binding	molecular_function	1.66113e-07	4.73385e-06	1.32808
GO:0032350	regulation of hormone metabolic process	biological_process	1.66113e-07	4.73385e-06	1.32808
GO:0042835	BRE binding	molecular_function	1.66113e-07	4.73385e-06	1.32808
GO:0043570	maintenance of DNA repeat elements	biological_process	1.66113e-07	4.73385e-06	1.32808
GO:0044334	canonical Wnt signaling pathway involved in positive regulation of epithelial to mesenchymal transition	biological_process	1.66113e-07	4.73385e-06	1.32808
GO:0048011	neurotrophin TRK receptor signaling pathway	biological_process	1.66113e-07	4.73385e-06	1.32808
GO:0090073	positive regulation of protein homodimerization activity	biological_process	1.66113e-07	4.73385e-06	1.32808
GO:1990829	C-rich single-stranded DNA binding	molecular_function	1.66113e-07	4.73385e-06	1.32808
GO:0035591	signaling adaptor activity	molecular_function	1.66494e-07	4.73452e-06	1.28064
GO:0034394	protein localization to cell surface	biological_process	1.84047e-07	5.2208e-06	1.24653
GO:0007035	vacuolar acidification	biological_process	1.84384e-07	5.2208e-06	1.29266
GO:0007224	smoothened signaling pathway	biological_process	1.93294e-07	5.46139e-06	1.1463
GO:0019233	sensory perception of pain	biological_process	2.02432e-07	5.70736e-06	1.21187
GO:0036002	pre-mRNA binding	molecular_function	2.13137e-07	5.99604e-06	1.21966
GO:0051145	smooth muscle cell differentiation	biological_process	2.13578e-07	5.99604e-06	1.28007
GO:0032809	neuronal cell body membrane	cellular_component	2.16418e-07	6.0501e-06	1.2697
GO:0048593	camera-type eye morphogenesis	biological_process	2.16418e-07	6.0501e-06	1.2697
GO:0030048	actin filament-based movement	biological_process	2.20654e-07	6.14253e-06	1.32808
GO:0032836	glomerular basement membrane development	biological_process	2.20654e-07	6.14253e-06	1.32808
GO:0032154	cleavage furrow	cellular_component	2.2303e-07	6.19564e-06	1.15872
GO:0042177	negative regulation of protein catabolic process	biological_process	2.29272e-07	6.3557e-06	1.19527
GO:0038083	peptidyl-tyrosine autophosphorylation	biological_process	2.37112e-07	6.55927e-06	1.18051
GO:0004715	non-membrane spanning protein tyrosine kinase activity	molecular_function	2.42058e-07	6.68212e-06	1.17441
GO:0010667	negative regulation of cardiac muscle cell apoptotic process	biological_process	2.5407e-07	6.99909e-06	1.26032
GO:0006760	folic acid-containing compound metabolic process	biological_process	2.73862e-07	7.52866e-06	1.27949
GO:0005545	1-phosphatidylinositol binding	molecular_function	2.74765e-07	7.5378e-06	1.19744
GO:0007608	sensory perception of smell	biological_process	2.8168e-07	7.71151e-06	1.21449
GO:0004439	phosphatidylinositol-4,5-bisphosphate 5-phosphatase activity	molecular_function	2.8399e-07	7.74268e-06	1.30732
GO:0061669	spontaneous neurotransmitter secretion	biological_process	2.8399e-07	7.74268e-06	1.30732
GO:0018027	peptidyl-lysine dimethylation	biological_process	2.93101e-07	7.94196e-06	1.32808
GO:0043549	regulation of kinase activity	biological_process	2.93101e-07	7.94196e-06	1.32808
GO:0048513	animal organ development	biological_process	2.93101e-07	7.94196e-06	1.32808
GO:0048812	neuron projection morphogenesis	biological_process	3.35901e-07	9.08306e-06	1.17313
GO:0007204	positive regulation of cytosolic calcium ion concentration	biological_process	3.37407e-07	9.10517e-06	1.14425
GO:0009925	basal plasma membrane	cellular_component	3.39437e-07	9.1413e-06	1.23245
GO:0008146	sulfotransferase activity	molecular_function	3.48264e-07	9.35995e-06	1.25146
GO:0048701	embryonic cranial skeleton morphogenesis	biological_process	3.50101e-07	9.39022e-06	1.26839
GO:0035019	somatic stem cell population maintenance	biological_process	3.62873e-07	9.71309e-06	1.20965
GO:0001726	ruffle	cellular_component	3.66567e-07	9.79215e-06	1.12172
GO:0060340	positive regulation of type I interferon-mediated signaling pathway	biological_process	3.71615e-07	9.90698e-06	1.30699
GO:0015858	nucleoside transport	biological_process	3.89334e-07	1.02562e-05	1.32808
GO:0030368	interleukin-17 receptor activity	molecular_function	3.89334e-07	1.02562e-05	1.32808
GO:0033081	regulation of T cell differentiation in thymus	biological_process	3.89334e-07	1.02562e-05	1.32808
GO:0044853	plasma membrane raft	cellular_component	3.89334e-07	1.02562e-05	1.32808
GO:2000096	positive regulation of Wnt signaling pathway, planar cell polarity pathway	biological_process	3.89334e-07	1.02562e-05	1.32808
GO:0007595	lactation	biological_process	3.89369e-07	1.02562e-05	1.2174
GO:0048596	embryonic camera-type eye morphogenesis	biological_process	3.99487e-07	1.05018e-05	1.29118
GO:0005771	multivesicular body	cellular_component	4.36886e-07	1.14622e-05	1.25071
GO:0033270	paranode region of axon	cellular_component	4.39935e-07	1.15193e-05	1.23727
GO:0045663	positive regulation of myoblast differentiation	biological_process	4.68326e-07	1.22385e-05	1.20159
GO:0097539	ciliary transition fiber	cellular_component	4.79958e-07	1.25177e-05	1.22592
GO:0086005	ventricular cardiac muscle cell action potential	biological_process	4.86163e-07	1.26509e-05	1.30665
GO:0043010	camera-type eye development	biological_process	4.86979e-07	1.26509e-05	1.17982
GO:0043552	positive regulation of phosphatidylinositol 3-kinase activity	biological_process	5.11168e-07	1.31751e-05	1.25818
GO:0031667	response to nutrient levels	biological_process	5.16559e-07	1.31751e-05	1.29066
GO:0002063	chondrocyte development	biological_process	5.17161e-07	1.31751e-05	1.32808
GO:0031697	beta-1 adrenergic receptor binding	molecular_function	5.17161e-07	1.31751e-05	1.32808
GO:0034597	phosphatidylinositol-4,5-bisphosphate 4-phosphatase activity	molecular_function	5.17161e-07	1.31751e-05	1.32808
GO:0050432	catecholamine secretion	biological_process	5.17161e-07	1.31751e-05	1.32808
GO:0051150	regulation of smooth muscle cell differentiation	biological_process	5.17161e-07	1.31751e-05	1.32808
GO:0061484	hematopoietic stem cell homeostasis	biological_process	5.17161e-07	1.31751e-05	1.32808
GO:0072368	regulation of lipid transport by negative regulation of transcription from RNA polymerase II promoter	biological_process	5.17161e-07	1.31751e-05	1.32808
GO:2000737	negative regulation of stem cell differentiation	biological_process	5.17161e-07	1.31751e-05	1.32808
GO:0071377	cellular response to glucagon stimulus	biological_process	5.18118e-07	1.31751e-05	1.2309
GO:0007275	multicellular organism development	biological_process	5.19224e-07	1.31779e-05	1.05423
GO:0017157	regulation of exocytosis	biological_process	5.33927e-07	1.35251e-05	1.20812
GO:0051216	cartilage development	biological_process	5.42392e-07	1.37057e-05	1.1865
GO:0001701	in utero embryonic development	biological_process	5.43129e-07	1.37057e-05	1.10815
GO:0007254	JNK cascade	biological_process	5.46962e-07	1.37761e-05	1.17117
GO:0030324	lung development	biological_process	5.76501e-07	1.44925e-05	1.17913
GO:0007596	blood coagulation	biological_process	5.87172e-07	1.47328e-05	1.12006
GO:0006909	phagocytosis	biological_process	6.01872e-07	1.49879e-05	1.18122
GO:0030010	establishment of cell polarity	biological_process	6.01872e-07	1.49879e-05	1.18122
GO:0031122	cytoplasmic microtubule organization	biological_process	6.01872e-07	1.49879e-05	1.18122
GO:0046928	regulation of neurotransmitter secretion	biological_process	6.01872e-07	1.49879e-05	1.18122
GO:0002087	regulation of respiratory gaseous exchange by neurological system process	biological_process	6.35867e-07	1.57454e-05	1.3063
GO:0043296	apical junction complex	cellular_component	6.35867e-07	1.57454e-05	1.3063
GO:0050690	regulation of defense response to virus by virus	biological_process	6.35867e-07	1.57454e-05	1.3063
GO:0016569	covalent chromatin modification	biological_process	6.4002e-07	1.58187e-05	1.09278
GO:0048702	embryonic neurocranium morphogenesis	biological_process	6.67693e-07	1.64718e-05	1.29013
GO:0045666	positive regulation of neuron differentiation	biological_process	6.7044e-07	1.65088e-05	1.14161
GO:0045787	positive regulation of cell cycle	biological_process	6.7671e-07	1.66322e-05	1.23569
GO:0046328	regulation of JNK cascade	biological_process	6.86376e-07	1.67594e-05	1.24918
GO:0010668	ectodermal cell differentiation	biological_process	6.86954e-07	1.67594e-05	1.32808
GO:0016458	gene silencing	biological_process	6.86954e-07	1.67594e-05	1.32808
GO:0097264	self proteolysis	biological_process	6.86954e-07	1.67594e-05	1.32808
GO:0043234	protein complex	cellular_component	7.02606e-07	1.71097e-05	1.05289
GO:0001205	transcriptional activator activity, RNA polymerase II distal enhancer sequence-specific DNA binding	molecular_function	7.17714e-07	1.74455e-05	1.2663
GO:0001954	positive regulation of cell-matrix adhesion	biological_process	7.37148e-07	1.7885e-05	1.277
GO:0008327	methyl-CpG binding	molecular_function	7.88982e-07	1.91075e-05	1.22929
GO:0031116	positive regulation of microtubule polymerization	biological_process	7.99853e-07	1.93251e-05	1.21905
GO:0008092	cytoskeletal protein binding	molecular_function	8.0089e-07	1.93251e-05	1.1344
GO:0009953	dorsal/ventral pattern formation	biological_process	8.12483e-07	1.95691e-05	1.25667
GO:0070072	vacuolar proton-transporting V-type ATPase complex assembly	biological_process	8.31464e-07	1.99536e-05	1.30594
GO:0099054	presynapse assembly	biological_process	8.31464e-07	1.99536e-05	1.30594
GO:0032024	positive regulation of insulin secretion	biological_process	8.45066e-07	2.02433e-05	1.17979
GO:0034333	adherens junction assembly	biological_process	8.62717e-07	2.06288e-05	1.28958
GO:0000118	histone deacetylase complex	cellular_component	8.97128e-07	2.14129e-05	1.15896
GO:0010976	positive regulation of neuron projection development	biological_process	9.05156e-07	2.14313e-05	1.11468
GO:0007016	cytoskeletal anchoring at plasma membrane	biological_process	9.12489e-07	2.14313e-05	1.32808
GO:0010573	vascular endothelial growth factor production	biological_process	9.12489e-07	2.14313e-05	1.32808
GO:0043297	apical junction assembly	biological_process	9.12489e-07	2.14313e-05	1.32808
GO:0060073	micturition	biological_process	9.12489e-07	2.14313e-05	1.32808
GO:0060992	response to fungicide	biological_process	9.12489e-07	2.14313e-05	1.32808
GO:1901017	negative regulation of potassium ion transmembrane transporter activity	biological_process	9.12489e-07	2.14313e-05	1.32808
GO:1901731	positive regulation of platelet aggregation	biological_process	9.12489e-07	2.14313e-05	1.32808
GO:1904754	positive regulation of vascular associated smooth muscle cell migration	biological_process	9.12489e-07	2.14313e-05	1.32808
GO:0016922	ligand-dependent nuclear receptor binding	molecular_function	9.72724e-07	2.28055e-05	1.22847
GO:0007010	cytoskeleton organization	biological_process	9.79654e-07	2.29274e-05	1.09303
GO:0007498	mesoderm development	biological_process	1.02348e-06	2.38427e-05	1.2559
GO:0034097	response to cytokine	biological_process	1.02348e-06	2.38427e-05	1.2559
GO:0010008	endosome membrane	cellular_component	1.0257e-06	2.38427e-05	1.08822
GO:0019900	kinase binding	molecular_function	1.02598e-06	2.38427e-05	1.11528
GO:0070528	protein kinase C signaling	biological_process	1.03843e-06	2.40897e-05	1.23405
GO:0016363	nuclear matrix	cellular_component	1.06132e-06	2.45778e-05	1.11067
GO:0031491	nucleosome binding	molecular_function	1.08695e-06	2.50396e-05	1.30557
GO:0046488	phosphatidylinositol metabolic process	biological_process	1.08695e-06	2.50396e-05	1.30557
GO:1902897	regulation of postsynaptic density protein 95 clustering	biological_process	1.08695e-06	2.50396e-05	1.30557
GO:0002520	immune system development	biological_process	1.11427e-06	2.55355e-05	1.28901
GO:0031143	pseudopodium	cellular_component	1.11427e-06	2.55355e-05	1.28901
GO:0031253	cell projection membrane	cellular_component	1.11427e-06	2.55355e-05	1.28901
GO:0038096	Fc-gamma receptor signaling pathway involved in phagocytosis	biological_process	1.14351e-06	2.61603e-05	1.16273
GO:0030334	regulation of cell migration	biological_process	1.19931e-06	2.72571e-05	1.1507
GO:0043271	negative regulation of ion transport	biological_process	1.20606e-06	2.72571e-05	1.27565
GO:0002175	protein localization to paranode region of axon	biological_process	1.21207e-06	2.72571e-05	1.32808
GO:0005677	chromatin silencing complex	cellular_component	1.21207e-06	2.72571e-05	1.32808
GO:0008332	low voltage-gated calcium channel activity	molecular_function	1.21207e-06	2.72571e-05	1.32808
GO:0014733	regulation of skeletal muscle adaptation	biological_process	1.21207e-06	2.72571e-05	1.32808
GO:0031571	mitotic G1 DNA damage checkpoint	biological_process	1.21207e-06	2.72571e-05	1.32808
GO:0086059	voltage-gated calcium channel activity involved SA node cell action potential	molecular_function	1.21207e-06	2.72571e-05	1.32808
GO:0098904	regulation of AV node cell action potential	biological_process	1.21207e-06	2.72571e-05	1.32808
GO:1902866	regulation of retina development in camera-type eye	biological_process	1.21207e-06	2.72571e-05	1.32808
GO:0005109	frizzled binding	molecular_function	1.28853e-06	2.88783e-05	1.2551
GO:0006646	phosphatidylethanolamine biosynthetic process	biological_process	1.28853e-06	2.88783e-05	1.2551
GO:0051959	dynein light intermediate chain binding	molecular_function	1.30517e-06	2.92018e-05	1.16941
GO:0008305	integrin complex	cellular_component	1.3394e-06	2.9917e-05	1.23954
GO:0009653	anatomical structure morphogenesis	biological_process	1.4806e-06	3.30151e-05	1.14374
GO:0000124	SAGA complex	cellular_component	1.54156e-06	3.42589e-05	1.27495
GO:0042634	regulation of hair cycle	biological_process	1.54156e-06	3.42589e-05	1.27495
GO:0007169	transmembrane receptor protein tyrosine kinase signaling pathway	biological_process	1.54429e-06	3.4262e-05	1.13726
GO:0032958	inositol phosphate biosynthetic process	biological_process	1.55567e-06	3.44155e-05	1.21175
GO:0009968	negative regulation of signal transduction	biological_process	1.55641e-06	3.44155e-05	1.16139
GO:0000421	autophagosome membrane	cellular_component	1.58954e-06	3.50894e-05	1.23236
GO:0006206	pyrimidine nucleobase metabolic process	biological_process	1.60999e-06	3.52466e-05	1.32808
GO:0034122	negative regulation of toll-like receptor signaling pathway	biological_process	1.60999e-06	3.52466e-05	1.32808
GO:0045161	neuronal ion channel clustering	biological_process	1.60999e-06	3.52466e-05	1.32808
GO:0086016	AV node cell action potential	biological_process	1.60999e-06	3.52466e-05	1.32808
GO:1901380	negative regulation of potassium ion transmembrane transport	biological_process	1.60999e-06	3.52466e-05	1.32808
GO:0051966	regulation of synaptic transmission, glutamatergic	biological_process	1.6763e-06	3.66375e-05	1.20329
GO:0071712	ER-associated misfolded protein catabolic process	biological_process	1.68237e-06	3.66992e-05	1.24593
GO:0008344	adult locomotory behavior	biological_process	1.68467e-06	3.66992e-05	1.16275
GO:0016485	protein processing	biological_process	1.71032e-06	3.71966e-05	1.19609
GO:0043966	histone H3 acetylation	biological_process	1.79686e-06	3.90146e-05	1.16799
GO:0031982	vesicle	cellular_component	1.82e-06	3.94523e-05	1.10872
GO:0002053	positive regulation of mesenchymal cell proliferation	biological_process	1.85607e-06	3.99169e-05	1.30478
GO:0003747	translation release factor activity	molecular_function	1.85607e-06	3.99169e-05	1.30478
GO:0089717	spanning component of membrane	cellular_component	1.85607e-06	3.99169e-05	1.30478
GO:0005521	lamin binding	molecular_function	1.85653e-06	3.99169e-05	1.28783
GO:0071374	cellular response to parathyroid hormone stimulus	biological_process	1.85653e-06	3.99169e-05	1.28783
GO:0030162	regulation of proteolysis	biological_process	1.8913e-06	4.05985e-05	1.21089
GO:0019216	regulation of lipid metabolic process	biological_process	1.93928e-06	4.15609e-05	1.13172
GO:0045216	cell-cell junction organization	biological_process	2.03874e-06	4.36219e-05	1.25346
GO:0031258	lamellipodium membrane	cellular_component	2.10184e-06	4.48146e-05	1.24507
GO:0006833	water transport	biological_process	2.13855e-06	4.48146e-05	1.32808
GO:0010960	magnesium ion homeostasis	biological_process	2.13855e-06	4.48146e-05	1.32808
GO:0021801	cerebral cortex radial glia guided migration	biological_process	2.13855e-06	4.48146e-05	1.32808
GO:0030981	cortical microtubule cytoskeleton	cellular_component	2.13855e-06	4.48146e-05	1.32808
GO:0031111	negative regulation of microtubule polymerization or depolymerization	biological_process	2.13855e-06	4.48146e-05	1.32808
GO:0031592	centrosomal corona	cellular_component	2.13855e-06	4.48146e-05	1.32808
GO:0055056	D-glucose transmembrane transporter activity	molecular_function	2.13855e-06	4.48146e-05	1.32808
GO:0070776	MOZ/MORF histone acetyltransferase complex	cellular_component	2.13855e-06	4.48146e-05	1.32808
GO:0072362	regulation of glycolytic process by negative regulation of transcription from RNA polymerase II promoter	biological_process	2.13855e-06	4.48146e-05	1.32808
GO:0072594	establishment of protein localization to organelle	biological_process	2.13855e-06	4.48146e-05	1.32808
GO:1900037	regulation of cellular response to hypoxia	biological_process	2.13855e-06	4.48146e-05	1.32808
GO:2000191	regulation of fatty acid transport	biological_process	2.13855e-06	4.48146e-05	1.32808
GO:0045995	regulation of embryonic development	biological_process	2.29785e-06	4.80766e-05	1.21002
GO:1902041	regulation of extrinsic apoptotic signaling pathway via death domain receptors	biological_process	2.39488e-06	5.00276e-05	1.28721
GO:0005522	profilin binding	molecular_function	2.42441e-06	5.02996e-05	1.30436
GO:0005916	fascia adherens	cellular_component	2.42441e-06	5.02996e-05	1.30436
GO:0032794	GTPase activating protein binding	molecular_function	2.42441e-06	5.02996e-05	1.30436
GO:0097062	dendritic spine maintenance	biological_process	2.42441e-06	5.02996e-05	1.30436
GO:0045956	positive regulation of calcium ion-dependent exocytosis	biological_process	2.42692e-06	5.02996e-05	1.2306
GO:0046330	positive regulation of JNK cascade	biological_process	2.48267e-06	5.13745e-05	1.14266
GO:0045987	positive regulation of smooth muscle contraction	biological_process	2.51468e-06	5.19555e-05	1.2735
GO:0042220	response to cocaine	biological_process	2.56215e-06	5.28538e-05	1.25262
GO:0006928	movement of cell or subcellular component	biological_process	2.56644e-06	5.28599e-05	1.17259
GO:0007029	endoplasmic reticulum organization	biological_process	2.64852e-06	5.44656e-05	1.21394
GO:0014066	regulation of phosphatidylinositol 3-kinase signaling	biological_process	2.78992e-06	5.71712e-05	1.20914
GO:0030674	protein binding, bridging	molecular_function	2.80103e-06	5.71712e-05	1.13105
GO:0016316	phosphatidylinositol-3,4-bisphosphate 4-phosphatase activity	molecular_function	2.84062e-06	5.71712e-05	1.32808
GO:0016589	NURF complex	cellular_component	2.84062e-06	5.71712e-05	1.32808
GO:0017161	inositol-1,3,4-trisphosphate 4-phosphatase activity	molecular_function	2.84062e-06	5.71712e-05	1.32808
GO:0022602	ovulation cycle process	biological_process	2.84062e-06	5.71712e-05	1.32808
GO:0044211	CTP salvage	biological_process	2.84062e-06	5.71712e-05	1.32808
GO:0044294	dendritic growth cone	cellular_component	2.84062e-06	5.71712e-05	1.32808
GO:0045602	negative regulation of endothelial cell differentiation	biological_process	2.84062e-06	5.71712e-05	1.32808
GO:0052828	inositol-3,4-bisphosphate 4-phosphatase activity	molecular_function	2.84062e-06	5.71712e-05	1.32808
GO:0060304	regulation of phosphatidylinositol dephosphorylation	biological_process	2.84062e-06	5.71712e-05	1.32808
GO:0071621	granulocyte chemotaxis	biological_process	2.84062e-06	5.71712e-05	1.32808
GO:0097400	interleukin-17-mediated signaling pathway	biological_process	2.84062e-06	5.71712e-05	1.32808
GO:2001199	negative regulation of dendritic cell differentiation	biological_process	2.84062e-06	5.71712e-05	1.32808
GO:0035612	AP-2 adaptor complex binding	molecular_function	2.97341e-06	5.95718e-05	1.26167
GO:0045776	negative regulation of blood pressure	biological_process	2.97341e-06	5.95718e-05	1.26167
GO:0045780	positive regulation of bone resorption	biological_process	2.97341e-06	5.95718e-05	1.26167
GO:0030136	clathrin-coated vesicle	cellular_component	2.97933e-06	5.96e-05	1.13448
GO:0010803	regulation of tumor necrosis factor-mediated signaling pathway	biological_process	3.01226e-06	6.01679e-05	1.21832
GO:0030507	spectrin binding	molecular_function	3.05263e-06	6.08822e-05	1.14412
GO:0035243	protein-arginine omega-N symmetric methyltransferase activity	molecular_function	3.16586e-06	6.27619e-05	1.30393
GO:0048681	negative regulation of axon regeneration	biological_process	3.16586e-06	6.27619e-05	1.30393
GO:0097427	microtubule bundle	cellular_component	3.16586e-06	6.27619e-05	1.30393
GO:1902952	positive regulation of dendritic spine maintenance	biological_process	3.16586e-06	6.27619e-05	1.30393
GO:0005544	calcium-dependent phospholipid binding	molecular_function	3.25844e-06	6.45005e-05	1.13606
GO:0008569	ATP-dependent microtubule motor activity, minus-end-directed	molecular_function	3.28378e-06	6.49049e-05	1.18388
GO:0016236	macroautophagy	biological_process	3.28911e-06	6.49133e-05	1.11414
GO:0008270	zinc ion binding	molecular_function	3.36313e-06	6.62228e-05	1.03868
GO:0001657	ureteric bud development	biological_process	3.37049e-06	6.62228e-05	1.22323
GO:0004438	phosphatidylinositol-3-phosphatase activity	molecular_function	3.37049e-06	6.62228e-05	1.22323
GO:0005912	adherens junction	cellular_component	3.42922e-06	6.72767e-05	1.12018
GO:0030155	regulation of cell adhesion	biological_process	3.63981e-06	7.13026e-05	1.16672
GO:0004861	cyclin-dependent protein serine/threonine kinase inhibitor activity	molecular_function	3.77316e-06	7.33713e-05	1.32808
GO:0005639	integral component of nuclear inner membrane	cellular_component	3.77316e-06	7.33713e-05	1.32808
GO:0010464	regulation of mesenchymal cell proliferation	biological_process	3.77316e-06	7.33713e-05	1.32808
GO:0048671	negative regulation of collateral sprouting	biological_process	3.77316e-06	7.33713e-05	1.32808
GO:2001045	negative regulation of integrin-mediated signaling pathway	biological_process	3.77316e-06	7.33713e-05	1.32808
GO:0006751	glutathione catabolic process	biological_process	3.97988e-06	7.70511e-05	1.28591
GO:0045134	uridine-diphosphatase activity	molecular_function	3.97988e-06	7.70511e-05	1.28591
GO:0055117	regulation of cardiac muscle contraction	biological_process	3.97988e-06	7.70511e-05	1.28591
GO:0023030	MHC class Ib protein binding, via antigen binding groove	molecular_function	4.03897e-06	7.79669e-05	1.25086
GO:2000568	positive regulation of memory T cell activation	biological_process	4.03897e-06	7.79669e-05	1.25086
GO:0060976	coronary vasculature development	biological_process	4.1044e-06	7.91145e-05	1.20734
GO:0098985	asymmetric, glutamatergic, excitatory synapse	cellular_component	4.13282e-06	7.95463e-05	1.30348
GO:0001649	osteoblast differentiation	biological_process	4.17681e-06	8.02761e-05	1.15066
GO:0004872	receptor activity	molecular_function	4.3232e-06	8.2969e-05	1.0869
GO:0051149	positive regulation of muscle cell differentiation	biological_process	4.55567e-06	8.73037e-05	1.22784
GO:0000828	inositol hexakisphosphate kinase activity	molecular_function	4.77642e-06	9.10066e-05	1.2112
GO:0000832	inositol hexakisphosphate 5-kinase activity	molecular_function	4.77642e-06	9.10066e-05	1.2112
GO:0052723	inositol hexakisphosphate 1-kinase activity	molecular_function	4.77642e-06	9.10066e-05	1.2112
GO:0052724	inositol hexakisphosphate 3-kinase activity	molecular_function	4.77642e-06	9.10066e-05	1.2112
GO:0045785	positive regulation of cell adhesion	biological_process	4.80849e-06	9.14859e-05	1.18493
GO:0030175	filopodium	cellular_component	4.84843e-06	9.20805e-05	1.12376
GO:0035091	phosphatidylinositol binding	molecular_function	4.85367e-06	9.20805e-05	1.10591
GO:0031418	L-ascorbic acid binding	molecular_function	4.8931e-06	9.26955e-05	1.23417
GO:0002675	positive regulation of acute inflammatory response	biological_process	5.01183e-06	9.3736e-05	1.32808
GO:0004972	NMDA glutamate receptor activity	molecular_function	5.01183e-06	9.3736e-05	1.32808
GO:0016264	gap junction assembly	biological_process	5.01183e-06	9.3736e-05	1.32808
GO:0033089	positive regulation of T cell differentiation in thymus	biological_process	5.01183e-06	9.3736e-05	1.32808
GO:0036435	K48-linked polyubiquitin modification-dependent protein binding	molecular_function	5.01183e-06	9.3736e-05	1.32808
GO:0038202	TORC1 signaling	biological_process	5.01183e-06	9.3736e-05	1.32808
GO:0097475	motor neuron migration	biological_process	5.01183e-06	9.3736e-05	1.32808
GO:1900020	positive regulation of protein kinase C activity	biological_process	5.01183e-06	9.3736e-05	1.32808
GO:1903423	positive regulation of synaptic vesicle recycling	biological_process	5.01183e-06	9.3736e-05	1.32808
GO:0034605	cellular response to heat	biological_process	5.06441e-06	9.44778e-05	1.19098
GO:0009880	embryonic pattern specification	biological_process	5.06622e-06	9.44778e-05	1.24995
GO:0007422	peripheral nervous system development	biological_process	5.07292e-06	9.44778e-05	1.22135
GO:0007156	homophilic cell adhesion via plasma membrane adhesion molecules	biological_process	5.08161e-06	9.45065e-05	1.09793
GO:0005031	tumor necrosis factor-activated receptor activity	molecular_function	5.12699e-06	9.49498e-05	1.28523
GO:0016709	oxidoreductase activity, acting on paired donors, with incorporation or reduction of molecular oxygen, NAD(P)H as one donor, and incorporation of one atom of oxygen	molecular_function	5.12699e-06	9.49498e-05	1.28523
GO:0042166	acetylcholine binding	molecular_function	5.12699e-06	9.49498e-05	1.28523
GO:0071949	FAD binding	molecular_function	5.14228e-06	9.50999e-05	1.19805
GO:0005861	troponin complex	cellular_component	5.21824e-06	9.62355e-05	1.27116
GO:0008656	cysteine-type endopeptidase activator activity involved in apoptotic process	molecular_function	5.21824e-06	9.62355e-05	1.27116
GO:0008064	regulation of actin polymerization or depolymerization	biological_process	5.39345e-06	9.90522e-05	1.30302
GO:0072553	terminal button organization	biological_process	5.39345e-06	9.90522e-05	1.30302
GO:2000727	positive regulation of cardiac muscle cell differentiation	biological_process	5.39345e-06	9.90522e-05	1.30302
GO:0002474	antigen processing and presentation of peptide antigen via MHC class I	biological_process	6.05809e-06	0.000111104	1.23321
GO:0005248	voltage-gated sodium channel activity	molecular_function	6.18378e-06	0.000113252	1.19714
GO:0035904	aorta development	biological_process	6.33523e-06	0.000115865	1.24051
GO:0001190	transcriptional activator activity, RNA polymerase II transcription factor binding	molecular_function	6.60157e-06	0.000119764	1.28453
GO:0021796	cerebral cortex regionalization	biological_process	6.60157e-06	0.000119764	1.28453
GO:1900024	regulation of substrate adhesion-dependent cell spreading	biological_process	6.60157e-06	0.000119764	1.28453
GO:0006491	N-glycan processing	biological_process	6.64838e-06	0.000119764	1.27033
GO:0048663	neuron fate commitment	biological_process	6.64838e-06	0.000119764	1.27033
GO:0002064	epithelial cell development	biological_process	6.6571e-06	0.000119764	1.32808
GO:0002467	germinal center formation	biological_process	6.6571e-06	0.000119764	1.32808
GO:0002634	regulation of germinal center formation	biological_process	6.6571e-06	0.000119764	1.32808
GO:0005587	collagen type IV trimer	cellular_component	6.6571e-06	0.000119764	1.32808
GO:0015085	calcium ion transmembrane transporter activity	molecular_function	6.6571e-06	0.000119764	1.32808
GO:0016185	synaptic vesicle budding from presynaptic endocytic zone membrane	biological_process	6.6571e-06	0.000119764	1.32808
GO:0034979	NAD-dependent protein deacetylase activity	molecular_function	6.6571e-06	0.000119764	1.32808
GO:0022011	myelination in peripheral nervous system	biological_process	6.90827e-06	0.000124114	1.22592
GO:0005814	centriole	cellular_component	6.91865e-06	0.000124132	1.0717
GO:0007193	adenylate cyclase-inhibiting G-protein coupled receptor signaling pathway	biological_process	6.96575e-06	0.000124808	1.17484
GO:0008277	regulation of G-protein coupled receptor protein signaling pathway	biological_process	6.99816e-06	0.00012505	1.13362
GO:0031032	actomyosin structure organization	biological_process	6.99816e-06	0.00012505	1.13362
GO:0036010	protein localization to endosome	biological_process	7.03634e-06	0.000125224	1.30254
GO:2000253	positive regulation of feeding behavior	biological_process	7.03634e-06	0.000125224	1.30254
GO:2001257	regulation of cation channel activity	biological_process	7.03634e-06	0.000125224	1.30254
GO:0014070	response to organic cyclic compound	biological_process	7.40785e-06	0.000131482	1.20019
GO:0072332	intrinsic apoptotic signaling pathway by p53 class mediator	biological_process	7.40785e-06	0.000131482	1.20019
GO:0031941	filamentous actin	cellular_component	7.61356e-06	0.000134952	1.21941
GO:0000086	G2/M transition of mitotic cell cycle	biological_process	7.68694e-06	0.00013607	1.0854
GO:0031018	endocrine pancreas development	biological_process	8.49604e-06	0.000149991	1.28381
GO:0045475	locomotor rhythm	biological_process	8.49604e-06	0.000149991	1.28381
GO:0001519	peptide amidation	biological_process	8.84245e-06	0.000153042	1.32808
GO:0001771	immunological synapse formation	biological_process	8.84245e-06	0.000153042	1.32808
GO:0002429	immune response-activating cell surface receptor signaling pathway	biological_process	8.84245e-06	0.000153042	1.32808
GO:0016199	axon midline choice point recognition	biological_process	8.84245e-06	0.000153042	1.32808
GO:0021914	negative regulation of smoothened signaling pathway involved in ventral spinal cord patterning	biological_process	8.84245e-06	0.000153042	1.32808
GO:0030104	water homeostasis	biological_process	8.84245e-06	0.000153042	1.32808
GO:0045598	regulation of fat cell differentiation	biological_process	8.84245e-06	0.000153042	1.32808
GO:0046579	positive regulation of Ras protein signal transduction	biological_process	8.84245e-06	0.000153042	1.32808
GO:0052836	inositol 5-diphosphate pentakisphosphate 5-kinase activity	molecular_function	8.84245e-06	0.000153042	1.32808
GO:0052839	inositol diphosphate tetrakisphosphate kinase activity	molecular_function	8.84245e-06	0.000153042	1.32808
GO:0071681	cellular response to indole-3-methanol	biological_process	8.84245e-06	0.000153042	1.32808
GO:0097113	AMPA glutamate receptor clustering	biological_process	8.84245e-06	0.000153042	1.32808
GO:1900121	negative regulation of receptor binding	biological_process	8.84245e-06	0.000153042	1.32808
GO:1901621	negative regulation of smoothened signaling pathway involved in dorsal/ventral neural tube patterning	biological_process	8.84245e-06	0.000153042	1.32808
GO:1904292	regulation of ERAD pathway	biological_process	8.84245e-06	0.000153042	1.32808
GO:0022008	neurogenesis	biological_process	9.31699e-06	0.000161044	1.21842
GO:0000002	mitochondrial genome maintenance	biological_process	9.80253e-06	0.000169215	1.23854
GO:0032433	filopodium tip	cellular_component	9.94358e-06	0.000171426	1.21259
GO:0031175	neuron projection development	biological_process	9.96726e-06	0.000171611	1.09534
GO:0032780	negative regulation of ATPase activity	biological_process	1.04454e-05	0.000179609	1.22391
GO:0019228	neuronal action potential	biological_process	1.06798e-05	0.000183402	1.1575
GO:0046856	phosphatidylinositol dephosphorylation	biological_process	1.07076e-05	0.000183639	1.19431
GO:1900017	positive regulation of cytokine production involved in inflammatory response	biological_process	1.07727e-05	0.000184517	1.26861
GO:0001047	core promoter binding	molecular_function	1.08076e-05	0.000184876	1.12769
GO:0043462	regulation of ATPase activity	biological_process	1.09286e-05	0.000186704	1.28306
GO:0004003	ATP-dependent DNA helicase activity	molecular_function	1.1393e-05	0.000194387	1.2174
GO:0002116	semaphorin receptor complex	cellular_component	1.17452e-05	0.000196839	1.32808
GO:0004095	carnitine O-palmitoyltransferase activity	molecular_function	1.17452e-05	0.000196839	1.32808
GO:0005078	MAP-kinase scaffold activity	molecular_function	1.17452e-05	0.000196839	1.32808
GO:0014902	myotube differentiation	biological_process	1.17452e-05	0.000196839	1.32808
GO:0015081	sodium ion transmembrane transporter activity	molecular_function	1.17452e-05	0.000196839	1.32808
GO:0021952	central nervous system projection neuron axonogenesis	biological_process	1.17452e-05	0.000196839	1.32808
GO:0030297	transmembrane receptor protein tyrosine kinase activator activity	molecular_function	1.17452e-05	0.000196839	1.32808
GO:0030832	regulation of actin filament length	biological_process	1.17452e-05	0.000196839	1.32808
GO:0035065	regulation of histone acetylation	biological_process	1.17452e-05	0.000196839	1.32808
GO:0035385	Roundabout signaling pathway	biological_process	1.17452e-05	0.000196839	1.32808
GO:0036374	glutathione hydrolase activity	molecular_function	1.17452e-05	0.000196839	1.32808
GO:0051388	positive regulation of neurotrophin TRK receptor signaling pathway	biological_process	1.17452e-05	0.000196839	1.32808
GO:0098976	excitatory chemical synaptic transmission	biological_process	1.17452e-05	0.000196839	1.32808
GO:1902275	regulation of chromatin organization	biological_process	1.17452e-05	0.000196839	1.32808
GO:0060627	regulation of vesicle-mediated transport	biological_process	1.19637e-05	0.000199743	1.30151
GO:0072643	interferon-gamma secretion	biological_process	1.19637e-05	0.000199743	1.30151
GO:2000074	regulation of type B pancreatic cell development	biological_process	1.19637e-05	0.000199743	1.30151
GO:0051019	mitogen-activated protein kinase binding	molecular_function	1.2057e-05	0.000201047	1.25629
GO:0006812	cation transport	biological_process	1.21024e-05	0.000201549	1.21158
GO:0030673	axolemma	cellular_component	1.21802e-05	0.000202081	1.23752
GO:0045807	positive regulation of endocytosis	biological_process	1.21802e-05	0.000202081	1.23752
GO:2000311	regulation of AMPA receptor activity	biological_process	1.21802e-05	0.000202081	1.23752
GO:0043044	ATP-dependent chromatin remodeling	biological_process	1.24563e-05	0.000206403	1.2461
GO:0043588	skin development	biological_process	1.25815e-05	0.000208217	1.20634
GO:0045665	negative regulation of neuron differentiation	biological_process	1.27349e-05	0.000210492	1.16462
GO:0099525	presynaptic dense core vesicle exocytosis	biological_process	1.37002e-05	0.000226164	1.26771
GO:0046339	diacylglycerol metabolic process	biological_process	1.41315e-05	0.000232994	1.22918
GO:1900026	positive regulation of substrate adhesion-dependent cell spreading	biological_process	1.42968e-05	0.000235426	1.17365
GO:0035097	histone methyltransferase complex	cellular_component	1.48944e-05	0.000244962	1.16378
GO:0071565	nBAF complex	cellular_component	1.51903e-05	0.000249207	1.2553
GO:1990381	ubiquitin-specific protease binding	molecular_function	1.51903e-05	0.000249207	1.2553
GO:0019226	transmission of nerve impulse	biological_process	1.55701e-05	0.000250349	1.24507
GO:0034045	phagophore assembly site membrane	cellular_component	1.55701e-05	0.000250349	1.24507
GO:0001158	enhancer sequence-specific DNA binding	molecular_function	1.55918e-05	0.000250349	1.30097
GO:0008432	JUN kinase binding	molecular_function	1.55918e-05	0.000250349	1.30097
GO:0030042	actin filament depolymerization	biological_process	1.55918e-05	0.000250349	1.30097
GO:0036089	cleavage furrow formation	biological_process	1.55918e-05	0.000250349	1.30097
GO:0001076	transcription factor activity, RNA polymerase II transcription factor binding	molecular_function	1.56007e-05	0.000250349	1.32808
GO:0002115	store-operated calcium entry	biological_process	1.56007e-05	0.000250349	1.32808
GO:0004504	peptidylglycine monooxygenase activity	molecular_function	1.56007e-05	0.000250349	1.32808
GO:0004598	peptidylamidoglycolate lyase activity	molecular_function	1.56007e-05	0.000250349	1.32808
GO:0007044	cell-substrate junction assembly	biological_process	1.56007e-05	0.000250349	1.32808
GO:0014033	neural crest cell differentiation	biological_process	1.56007e-05	0.000250349	1.32808
GO:0018032	protein amidation	biological_process	1.56007e-05	0.000250349	1.32808
GO:0021532	neural tube patterning	biological_process	1.56007e-05	0.000250349	1.32808
GO:0031915	positive regulation of synaptic plasticity	biological_process	1.56007e-05	0.000250349	1.32808
GO:0033292	T-tubule organization	biological_process	1.56007e-05	0.000250349	1.32808
GO:0045294	alpha-catenin binding	molecular_function	1.56007e-05	0.000250349	1.32808
GO:0098910	regulation of atrial cardiac muscle cell action potential	biological_process	1.56007e-05	0.000250349	1.32808
GO:0048839	inner ear development	biological_process	1.57458e-05	0.000252372	1.22183
GO:0043198	dendritic shaft	cellular_component	1.64958e-05	0.000264072	1.13977
GO:0005198	structural molecule activity	molecular_function	1.71704e-05	0.000274539	1.08578
GO:0048643	positive regulation of skeletal muscle tissue development	biological_process	1.74121e-05	0.000278068	1.26678
GO:0032870	cellular response to hormone stimulus	biological_process	1.84373e-05	0.000294084	1.20427
GO:0001525	angiogenesis	biological_process	1.85481e-05	0.000295496	1.08316
GO:0007223	Wnt signaling pathway, calcium modulating pathway	biological_process	1.85727e-05	0.000295531	1.16961
GO:0034613	cellular protein localization	biological_process	1.86212e-05	0.000295948	1.151
GO:0001892	embryonic placenta development	biological_process	2.03125e-05	0.000322439	1.30041
GO:0045880	positive regulation of smoothened signaling pathway	biological_process	2.07182e-05	0.000325034	1.18352
GO:0005021	vascular endothelial growth factor-activated receptor activity	molecular_function	2.07217e-05	0.000325034	1.32808
GO:0010447	response to acidic pH	biological_process	2.07217e-05	0.000325034	1.32808
GO:0021817	nucleokinesis involved in cell motility in cerebral cortex radial glia guided migration	biological_process	2.07217e-05	0.000325034	1.32808
GO:0030123	AP-3 adaptor complex	cellular_component	2.07217e-05	0.000325034	1.32808
GO:0032687	negative regulation of interferon-alpha production	biological_process	2.07217e-05	0.000325034	1.32808
GO:0035374	chondroitin sulfate binding	molecular_function	2.07217e-05	0.000325034	1.32808
GO:0060971	embryonic heart tube left/right pattern formation	biological_process	2.07217e-05	0.000325034	1.32808
GO:0070097	delta-catenin binding	molecular_function	2.07217e-05	0.000325034	1.32808
GO:0099612	protein localization to axon	biological_process	2.07217e-05	0.000325034	1.32808
GO:0061178	regulation of insulin secretion involved in cellular response to glucose stimulus	biological_process	2.18175e-05	0.000341816	1.16871
GO:0030011	maintenance of cell polarity	biological_process	2.21151e-05	0.000345251	1.26582
GO:0045104	intermediate filament cytoskeleton organization	biological_process	2.21151e-05	0.000345251	1.26582
GO:0045765	regulation of angiogenesis	biological_process	2.21151e-05	0.000345251	1.26582
GO:1990454	L-type voltage-gated calcium channel complex	cellular_component	2.22929e-05	0.000347617	1.20321
GO:0018107	peptidyl-threonine phosphorylation	biological_process	2.24759e-05	0.000350058	1.10485
GO:0016600	flotillin complex	cellular_component	2.3185e-05	0.000360253	1.28064
GO:0048642	negative regulation of skeletal muscle tissue development	biological_process	2.3185e-05	0.000360253	1.28064
GO:0005859	muscle myosin complex	cellular_component	2.32605e-05	0.000360579	1.23433
GO:0035035	histone acetyltransferase binding	molecular_function	2.32605e-05	0.000360579	1.23433
GO:0030433	ubiquitin-dependent ERAD pathway	biological_process	2.41817e-05	0.000374419	1.13066
GO:0003084	positive regulation of systemic arterial blood pressure	biological_process	2.64522e-05	0.000408618	1.29982
GO:0007172	signal complex assembly	biological_process	2.64522e-05	0.000408618	1.29982
GO:0001784	phosphotyrosine residue binding	molecular_function	2.68629e-05	0.000414479	1.19319
GO:0051693	actin filament capping	biological_process	2.70821e-05	0.000417214	1.19744
GO:0005923	bicellular tight junction	cellular_component	2.71033e-05	0.000417214	1.09092
GO:0000923	equatorial microtubule organizing center	cellular_component	2.75237e-05	0.000417849	1.32808
GO:0006563	L-serine metabolic process	biological_process	2.75237e-05	0.000417849	1.32808
GO:0008273	calcium, potassium:sodium antiporter activity	molecular_function	2.75237e-05	0.000417849	1.32808
GO:0016402	pristanoyl-CoA oxidase activity	molecular_function	2.75237e-05	0.000417849	1.32808
GO:0018393	internal peptidyl-lysine acetylation	biological_process	2.75237e-05	0.000417849	1.32808
GO:0022038	corpus callosum development	biological_process	2.75237e-05	0.000417849	1.32808
GO:0030431	sleep	biological_process	2.75237e-05	0.000417849	1.32808
GO:0030575	nuclear body organization	biological_process	2.75237e-05	0.000417849	1.32808
GO:0032675	regulation of interleukin-6 production	biological_process	2.75237e-05	0.000417849	1.32808
GO:0039706	co-receptor binding	molecular_function	2.75237e-05	0.000417849	1.32808
GO:0050790	regulation of catalytic activity	biological_process	2.75237e-05	0.000417849	1.32808
GO:0051415	interphase microtubule nucleation by interphase microtubule organizing center	biological_process	2.75237e-05	0.000417849	1.32808
GO:0005539	glycosaminoglycan binding	molecular_function	2.80692e-05	0.000425642	1.26483
GO:0030513	positive regulation of BMP signaling pathway	biological_process	2.88131e-05	0.000436422	1.23321
GO:0017166	vinculin binding	molecular_function	2.97573e-05	0.000449179	1.27978
GO:0033276	transcription factor TFTC complex	cellular_component	2.97573e-05	0.000449179	1.27978
GO:0060216	definitive hemopoiesis	biological_process	2.97573e-05	0.000449179	1.27978
GO:0045652	regulation of megakaryocyte differentiation	biological_process	2.99476e-05	0.000451536	1.14671
GO:0030121	AP-1 adaptor complex	cellular_component	3.02457e-05	0.000454342	1.25219
GO:0033010	paranodal junction	cellular_component	3.02457e-05	0.000454342	1.25219
GO:1901741	positive regulation of myoblast fusion	biological_process	3.02457e-05	0.000454342	1.25219
GO:0008066	glutamate receptor activity	molecular_function	3.02711e-05	0.000454342	1.24184
GO:0004697	protein kinase C activity	molecular_function	3.07863e-05	0.000461551	1.21203
GO:0016323	basolateral plasma membrane	cellular_component	3.09852e-05	0.000464006	1.07886
GO:0007257	activation of JUN kinase activity	biological_process	3.14631e-05	0.000470629	1.18828
GO:0030016	myofibril	cellular_component	3.21903e-05	0.000480964	1.19213
GO:0042472	inner ear morphogenesis	biological_process	3.30117e-05	0.00049268	1.17756
GO:0046854	phosphatidylinositol phosphorylation	biological_process	3.47112e-05	0.000517459	1.18051
GO:0006886	intracellular protein transport	biological_process	3.52792e-05	0.000525334	1.05722
GO:0043523	regulation of neuron apoptotic process	biological_process	3.5441e-05	0.00052715	1.2174
GO:0030274	LIM domain binding	molecular_function	3.56016e-05	0.000528943	1.26381
GO:0000045	autophagosome assembly	biological_process	3.63718e-05	0.000532978	1.12441
GO:0006972	hyperosmotic response	biological_process	3.65584e-05	0.000532978	1.32808
GO:0007227	signal transduction downstream of smoothened	biological_process	3.65584e-05	0.000532978	1.32808
GO:0008045	motor neuron axon guidance	biological_process	3.65584e-05	0.000532978	1.32808
GO:0009954	proximal/distal pattern formation	biological_process	3.65584e-05	0.000532978	1.32808
GO:0010830	regulation of myotube differentiation	biological_process	3.65584e-05	0.000532978	1.32808
GO:0016013	syntrophin complex	cellular_component	3.65584e-05	0.000532978	1.32808
GO:0030035	microspike assembly	biological_process	3.65584e-05	0.000532978	1.32808
GO:0032703	negative regulation of interleukin-2 production	biological_process	3.65584e-05	0.000532978	1.32808
GO:0045657	positive regulation of monocyte differentiation	biological_process	3.65584e-05	0.000532978	1.32808
GO:0060002	plus-end directed microfilament motor activity	molecular_function	3.65584e-05	0.000532978	1.32808
GO:0061857	endoplasmic reticulum stress-induced pre-emptive quality control	biological_process	3.65584e-05	0.000532978	1.32808
GO:0070571	negative regulation of neuron projection regeneration	biological_process	3.65584e-05	0.000532978	1.32808
GO:0071709	membrane assembly	biological_process	3.65584e-05	0.000532978	1.32808
GO:0099061	integral component of postsynaptic density membrane	cellular_component	3.65584e-05	0.000532978	1.32808
GO:1904781	positive regulation of protein localization to centrosome	biological_process	3.65584e-05	0.000532978	1.32808
GO:2000393	negative regulation of lamellipodium morphogenesis	biological_process	3.65584e-05	0.000532978	1.32808
GO:0001707	mesoderm formation	biological_process	3.77215e-05	0.000548725	1.2407
GO:2000251	positive regulation of actin cytoskeleton reorganization	biological_process	3.77215e-05	0.000548725	1.2407
GO:1902018	negative regulation of cilium assembly	biological_process	3.79934e-05	0.000552073	1.25109
GO:0016459	myosin complex	cellular_component	3.81124e-05	0.000552813	1.163
GO:0010039	response to iron ion	biological_process	3.81698e-05	0.000552813	1.27889
GO:0086080	protein binding involved in heterotypic cell-cell adhesion	molecular_function	3.81698e-05	0.000552813	1.27889
GO:0070412	R-SMAD binding	molecular_function	3.8695e-05	0.000559758	1.20511
GO:0071805	potassium ion transmembrane transport	biological_process	3.87339e-05	0.000559758	1.1315
GO:0000980	RNA polymerase II distal enhancer sequence-specific DNA binding	molecular_function	3.9049e-05	0.000563695	1.17655
GO:0016049	cell growth	biological_process	3.91308e-05	0.00056426	1.19527
GO:0043113	receptor clustering	biological_process	4.34308e-05	0.000625584	1.17285
GO:0017162	aryl hydrocarbon receptor binding	molecular_function	4.4805e-05	0.000643275	1.29856
GO:0018095	protein polyglutamylation	biological_process	4.4805e-05	0.000643275	1.29856
GO:0060830	ciliary receptor clustering involved in smoothened signaling pathway	biological_process	4.4805e-05	0.000643275	1.29856
GO:0010909	positive regulation of heparan sulfate proteoglycan biosynthetic process	biological_process	4.51226e-05	0.000645034	1.26276
GO:0052659	inositol-1,3,4,5-tetrakisphosphate 5-phosphatase activity	molecular_function	4.51226e-05	0.000645034	1.26276
GO:2001236	regulation of extrinsic apoptotic signaling pathway	biological_process	4.51226e-05	0.000645034	1.26276
GO:2001243	negative regulation of intrinsic apoptotic signaling pathway	biological_process	4.51226e-05	0.000645034	1.26276
GO:0043123	positive regulation of I-kappaB kinase/NF-kappaB signaling	biological_process	4.66141e-05	0.000665636	1.09371
GO:0006520	cellular amino acid metabolic process	biological_process	4.68307e-05	0.000668007	1.20396
GO:0042800	histone methyltransferase activity (H3-K4 specific)	molecular_function	4.69669e-05	0.000669227	1.23954
GO:0014823	response to activity	biological_process	4.76882e-05	0.000675172	1.24995
GO:0005600	collagen type XIII trimer	cellular_component	4.85584e-05	0.000675172	1.32808
GO:0010603	regulation of cytoplasmic mRNA processing body assembly	biological_process	4.85584e-05	0.000675172	1.32808
GO:0015278	calcium-release channel activity	molecular_function	4.85584e-05	0.000675172	1.32808
GO:0015379	potassium:chloride symporter activity	molecular_function	4.85584e-05	0.000675172	1.32808
GO:0022820	potassium ion symporter activity	molecular_function	4.85584e-05	0.000675172	1.32808
GO:0034465	response to carbon monoxide	biological_process	4.85584e-05	0.000675172	1.32808
GO:0035373	chondroitin sulfate proteoglycan binding	molecular_function	4.85584e-05	0.000675172	1.32808
GO:0036371	protein localization to T-tubule	biological_process	4.85584e-05	0.000675172	1.32808
GO:0046007	negative regulation of activated T cell proliferation	biological_process	4.85584e-05	0.000675172	1.32808
GO:0060039	pericardium development	biological_process	4.85584e-05	0.000675172	1.32808
GO:0060044	negative regulation of cardiac muscle cell proliferation	biological_process	4.85584e-05	0.000675172	1.32808
GO:0060083	smooth muscle contraction involved in micturition	biological_process	4.85584e-05	0.000675172	1.32808
GO:0070461	SAGA-type complex	cellular_component	4.85584e-05	0.000675172	1.32808
GO:0071818	BAT3 complex	cellular_component	4.85584e-05	0.000675172	1.32808
GO:0086066	atrial cardiac muscle cell to AV node cell communication	biological_process	4.85584e-05	0.000675172	1.32808
GO:0086070	SA node cell to atrial cardiac muscle cell communication	biological_process	4.85584e-05	0.000675172	1.32808
GO:0090083	regulation of inclusion body assembly	biological_process	4.85584e-05	0.000675172	1.32808
GO:0098907	regulation of SA node cell action potential	biological_process	4.85584e-05	0.000675172	1.32808
GO:1901019	regulation of calcium ion transmembrane transporter activity	biological_process	4.85584e-05	0.000675172	1.32808
GO:1901021	positive regulation of calcium ion transmembrane transporter activity	biological_process	4.85584e-05	0.000675172	1.32808
GO:1903428	positive regulation of reactive oxygen species biosynthetic process	biological_process	4.85584e-05	0.000675172	1.32808
GO:2001288	positive regulation of caveolin-mediated endocytosis	biological_process	4.85584e-05	0.000675172	1.32808
GO:0005080	protein kinase C binding	molecular_function	4.87586e-05	0.000677243	1.14726
GO:0051787	misfolded protein binding	molecular_function	4.893e-05	0.000677488	1.27796
GO:0051864	histone demethylase activity (H3-K36 specific)	molecular_function	4.893e-05	0.000677488	1.27796
GO:1902236	negative regulation of endoplasmic reticulum stress-induced intrinsic apoptotic signaling pathway	biological_process	4.893e-05	0.000677488	1.27796
GO:0030667	secretory granule membrane	cellular_component	5.0218e-05	0.000694594	1.10727
GO:0120103	centriolar subdistal appendage	cellular_component	5.12069e-05	0.000707533	1.1816
GO:0008542	visual learning	biological_process	5.25305e-05	0.000725063	1.14345
GO:0006998	nuclear envelope organization	biological_process	5.69078e-05	0.000783846	1.19764
GO:0042130	negative regulation of T cell proliferation	biological_process	5.69078e-05	0.000783846	1.19764
GO:1904491	protein localization to ciliary transition zone	biological_process	5.71474e-05	0.000786326	1.26167
GO:0000322	storage vacuole	cellular_component	5.82744e-05	0.000797684	1.29789
GO:0030903	notochord development	biological_process	5.82744e-05	0.000797684	1.29789
GO:0034340	response to type I interferon	biological_process	5.82744e-05	0.000797684	1.29789
GO:0043548	phosphatidylinositol 3-kinase binding	molecular_function	5.82744e-05	0.000797684	1.29789
GO:0045760	positive regulation of action potential	biological_process	5.82744e-05	0.000797684	1.29789
GO:1900182	positive regulation of protein localization to nucleus	biological_process	5.8429e-05	0.000798973	1.23834
GO:0070742	C2H2 zinc finger domain binding	molecular_function	5.98083e-05	0.000816989	1.24879
GO:0042641	actomyosin	cellular_component	6.03602e-05	0.000823677	1.22122
GO:0002576	platelet degranulation	biological_process	6.05982e-05	0.000826072	1.11024
GO:0034720	histone H3-K4 demethylation	biological_process	6.26831e-05	0.000851859	1.277
GO:0055003	cardiac myofibril assembly	biological_process	6.26831e-05	0.000851859	1.277
GO:2000741	positive regulation of mesenchymal stem cell differentiation	biological_process	6.26831e-05	0.000851859	1.277
GO:0034976	response to endoplasmic reticulum stress	biological_process	6.29751e-05	0.000854948	1.13114
GO:0010457	centriole-centriole cohesion	biological_process	6.3529e-05	0.000861583	1.18394
GO:0000026	alpha-1,2-mannosyltransferase activity	molecular_function	6.44973e-05	0.000863952	1.32808
GO:0003211	cardiac ventricle formation	biological_process	6.44973e-05	0.000863952	1.32808
GO:0008046	axon guidance receptor activity	molecular_function	6.44973e-05	0.000863952	1.32808
GO:0015250	water channel activity	molecular_function	6.44973e-05	0.000863952	1.32808
GO:0021891	olfactory bulb interneuron development	biological_process	6.44973e-05	0.000863952	1.32808
GO:0022890	inorganic cation transmembrane transporter activity	molecular_function	6.44973e-05	0.000863952	1.32808
GO:0035493	SNARE complex assembly	biological_process	6.44973e-05	0.000863952	1.32808
GO:0048009	insulin-like growth factor receptor signaling pathway	biological_process	6.44973e-05	0.000863952	1.32808
GO:0060346	bone trabecula formation	biological_process	6.44973e-05	0.000863952	1.32808
GO:0070092	regulation of glucagon secretion	biological_process	6.44973e-05	0.000863952	1.32808
GO:1990130	GATOR1 complex	cellular_component	6.44973e-05	0.000863952	1.32808
GO:0031663	lipopolysaccharide-mediated signaling pathway	biological_process	6.4553e-05	0.000863952	1.21383
GO:0032793	positive regulation of CREB transcription factor activity	biological_process	6.4553e-05	0.000863952	1.21383
GO:0070374	positive regulation of ERK1 and ERK2 cascade	biological_process	6.61225e-05	0.000884062	1.08803
GO:0019725	cellular homeostasis	biological_process	6.72733e-05	0.00089854	1.22847
GO:0000188	inactivation of MAPK activity	biological_process	6.84147e-05	0.000912597	1.20159
GO:1900273	positive regulation of long-term synaptic potentiation	biological_process	6.84638e-05	0.000912597	1.19646
GO:0019899	enzyme binding	molecular_function	6.89599e-05	0.000918285	1.06516
GO:0006914	autophagy	biological_process	7.04407e-05	0.000936463	1.08641
GO:0042393	histone binding	molecular_function	7.04667e-05	0.000936463	1.09101
GO:0016461	unconventional myosin complex	cellular_component	7.23211e-05	0.000960142	1.26055
GO:0071158	positive regulation of cell cycle arrest	biological_process	7.26256e-05	0.000963218	1.23711
GO:0031965	nuclear membrane	cellular_component	7.43553e-05	0.00098517	1.05761
GO:2000060	positive regulation of protein ubiquitination involved in ubiquitin-dependent protein catabolic process	biological_process	7.49464e-05	0.000992008	1.24759
GO:0001221	transcription cofactor binding	molecular_function	7.57586e-05	0.000993806	1.29719
GO:0008080	N-acetyltransferase activity	molecular_function	7.57586e-05	0.000993806	1.29719
GO:0031643	positive regulation of myelination	biological_process	7.57586e-05	0.000993806	1.29719
GO:0044257	cellular protein catabolic process	biological_process	7.57586e-05	0.000993806	1.29719
GO:0046688	response to copper ion	biological_process	7.57586e-05	0.000993806	1.29719
GO:0050774	negative regulation of dendrite morphogenesis	biological_process	7.57586e-05	0.000993806	1.29719
GO:0070560	protein secretion by platelet	biological_process	7.57586e-05	0.000993806	1.29719
GO:0098983	symmetric, GABA-ergic, inhibitory synapse	cellular_component	7.57586e-05	0.000993806	1.29719
GO:2000394	positive regulation of lamellipodium morphogenesis	biological_process	7.57586e-05	0.000993806	1.29719
GO:0051092	positive regulation of NF-kappaB transcription factor activity	biological_process	7.77295e-05	0.00101865	1.10209
GO:0000062	fatty-acyl-CoA binding	molecular_function	7.85567e-05	0.00102847	1.18656
GO:0045109	intermediate filament organization	biological_process	8.02484e-05	0.00104647	1.27599
GO:0046541	saliva secretion	biological_process	8.02484e-05	0.00104647	1.27599
GO:1904861	excitatory synapse assembly	biological_process	8.02484e-05	0.00104647	1.27599
GO:2000378	negative regulation of reactive oxygen species metabolic process	biological_process	8.02484e-05	0.00104647	1.27599
GO:0097320	plasma membrane tubulation	biological_process	8.14694e-05	0.00106135	1.20611
GO:0003138	primary heart field specification	biological_process	8.56675e-05	0.00109553	1.32808
GO:0003185	sinoatrial valve morphogenesis	biological_process	8.56675e-05	0.00109553	1.32808
GO:0006473	protein acetylation	biological_process	8.56675e-05	0.00109553	1.32808
GO:0006642	triglyceride mobilization	biological_process	8.56675e-05	0.00109553	1.32808
GO:0006777	Mo-molybdopterin cofactor biosynthetic process	biological_process	8.56675e-05	0.00109553	1.32808
GO:0007521	muscle cell fate determination	biological_process	8.56675e-05	0.00109553	1.32808
GO:0008353	RNA polymerase II carboxy-terminal domain kinase activity	molecular_function	8.56675e-05	0.00109553	1.32808
GO:0010469	regulation of receptor activity	biological_process	8.56675e-05	0.00109553	1.32808
GO:0021615	glossopharyngeal nerve morphogenesis	biological_process	8.56675e-05	0.00109553	1.32808
GO:0021904	dorsal/ventral neural tube patterning	biological_process	8.56675e-05	0.00109553	1.32808
GO:0030208	dermatan sulfate biosynthetic process	biological_process	8.56675e-05	0.00109553	1.32808
GO:0031022	nuclear migration along microfilament	biological_process	8.56675e-05	0.00109553	1.32808
GO:0033504	floor plate development	biological_process	8.56675e-05	0.00109553	1.32808
GO:0033623	regulation of integrin activation	biological_process	8.56675e-05	0.00109553	1.32808
GO:0046935	1-phosphatidylinositol-3-kinase regulator activity	molecular_function	8.56675e-05	0.00109553	1.32808
GO:0048713	regulation of oligodendrocyte differentiation	biological_process	8.56675e-05	0.00109553	1.32808
GO:0097371	MDM2/MDM4 family protein binding	molecular_function	8.56675e-05	0.00109553	1.32808
GO:1904379	protein localization to cytosolic proteasome complex involved in ERAD pathway	biological_process	8.56675e-05	0.00109553	1.32808
GO:2000111	positive regulation of macrophage apoptotic process	biological_process	8.56675e-05	0.00109553	1.32808
GO:0001046	core promoter sequence-specific DNA binding	molecular_function	8.93535e-05	0.00114046	1.17129
GO:0032007	negative regulation of TOR signaling	biological_process	8.93535e-05	0.00114046	1.17129
GO:0061098	positive regulation of protein tyrosine kinase activity	biological_process	9.01915e-05	0.00115005	1.23585
GO:0070208	protein heterotrimerization	biological_process	9.38355e-05	0.00119421	1.24635
GO:1990907	beta-catenin-TCF complex	cellular_component	9.38355e-05	0.00119421	1.24635
GO:0030666	endocytic vesicle membrane	cellular_component	9.57633e-05	0.00121758	1.13669
GO:0035579	specific granule membrane	cellular_component	9.61015e-05	0.0012207	1.10916
GO:0030139	endocytic vesicle	cellular_component	9.77489e-05	0.00124044	1.13511
GO:0031589	cell-substrate adhesion	biological_process	9.84418e-05	0.00124089	1.29645
GO:0031673	H zone	cellular_component	9.84418e-05	0.00124089	1.29645
GO:0031802	type 5 metabotropic glutamate receptor binding	molecular_function	9.84418e-05	0.00124089	1.29645
GO:0042577	lipid phosphatase activity	molecular_function	9.84418e-05	0.00124089	1.29645
GO:0050953	sensory perception of light stimulus	biological_process	9.84418e-05	0.00124089	1.29645
GO:0140058	neuron projection arborization	biological_process	9.84418e-05	0.00124089	1.29645
GO:1901018	positive regulation of potassium ion transmembrane transporter activity	biological_process	9.84418e-05	0.00124089	1.29645
GO:0031338	regulation of vesicle fusion	biological_process	9.90435e-05	0.00124729	1.10195
GO:0048870	cell motility	biological_process	9.95886e-05	0.00125296	1.19914
GO:0004849	uridine kinase activity	molecular_function	0.000102665	0.00128676	1.27495
GO:0030325	adrenal gland development	biological_process	0.000102665	0.00128676	1.27495
GO:0055005	ventricular cardiac myofibril assembly	biological_process	0.000102665	0.00128676	1.27495
GO:0060087	relaxation of vascular smooth muscle	biological_process	0.000102665	0.00128676	1.27495
GO:0060395	SMAD protein signal transduction	biological_process	0.000111567	0.00139314	1.1842
GO:0000146	microfilament motor activity	molecular_function	0.000111904	0.00139314	1.23455
GO:0021819	layer formation in cerebral cortex	biological_process	0.000111904	0.00139314	1.23455
GO:0060996	dendritic spine development	biological_process	0.000111904	0.00139314	1.23455
GO:1904322	cellular response to forskolin	biological_process	0.000111904	0.00139314	1.23455
GO:0001727	lipid kinase activity	molecular_function	0.000113786	0.00139314	1.32808
GO:0002309	T cell proliferation involved in immune response	biological_process	0.000113786	0.00139314	1.32808
GO:0002774	Fc receptor mediated inhibitory signaling pathway	biological_process	0.000113786	0.00139314	1.32808
GO:0004723	calcium-dependent protein serine/threonine phosphatase activity	molecular_function	0.000113786	0.00139314	1.32808
GO:0004999	vasoactive intestinal polypeptide receptor activity	molecular_function	0.000113786	0.00139314	1.32808
GO:0006929	substrate-dependent cell migration	biological_process	0.000113786	0.00139314	1.32808
GO:0016242	negative regulation of macroautophagy	biological_process	0.000113786	0.00139314	1.32808
GO:0023051	regulation of signaling	biological_process	0.000113786	0.00139314	1.32808
GO:0030497	fatty acid elongation	biological_process	0.000113786	0.00139314	1.32808
GO:0042382	paraspeckles	cellular_component	0.000113786	0.00139314	1.32808
GO:0043266	regulation of potassium ion transport	biological_process	0.000113786	0.00139314	1.32808
GO:0045345	positive regulation of MHC class I biosynthetic process	biological_process	0.000113786	0.00139314	1.32808
GO:0046885	regulation of hormone biosynthetic process	biological_process	0.000113786	0.00139314	1.32808
GO:0070579	methylcytosine dioxygenase activity	molecular_function	0.000113786	0.00139314	1.32808
GO:0071476	cellular hypotonic response	biological_process	0.000113786	0.00139314	1.32808
GO:0097114	NMDA glutamate receptor clustering	biological_process	0.000113786	0.00139314	1.32808
GO:1902474	positive regulation of protein localization to synapse	biological_process	0.000113786	0.00139314	1.32808
GO:1990416	cellular response to brain-derived neurotrophic factor stimulus	biological_process	0.000113786	0.00139314	1.32808
GO:2000008	regulation of protein localization to cell surface	biological_process	0.000113786	0.00139314	1.32808
GO:2001107	negative regulation of Rho guanyl-nucleotide exchange factor activity	biological_process	0.000113786	0.00139314	1.32808
GO:0045743	positive regulation of fibroblast growth factor receptor signaling pathway	biological_process	0.000115547	0.00141209	1.25818
GO:0090161	Golgi ribbon formation	biological_process	0.000115547	0.00141209	1.25818
GO:0005201	extracellular matrix structural constituent	molecular_function	0.000117184	0.00143076	1.14729
GO:0008361	regulation of cell size	biological_process	0.000117382	0.00143186	1.24507
GO:0008195	phosphatidate phosphatase activity	molecular_function	0.000118573	0.00144373	1.19281
GO:0043627	response to estrogen	biological_process	0.000118573	0.00144373	1.19281
GO:0042981	regulation of apoptotic process	biological_process	0.00012608	0.00153373	1.06761
GO:0007616	long-term memory	biological_process	0.000126541	0.00153791	1.17933
GO:0004458	D-lactate dehydrogenase (cytochrome) activity	molecular_function	0.000127853	0.00155101	1.29568
GO:0032495	response to muramyl dipeptide	biological_process	0.000127853	0.00155101	1.29568
GO:0021522	spinal cord motor neuron differentiation	biological_process	0.000131249	0.00158638	1.27387
GO:0070972	protein localization to endoplasmic reticulum	biological_process	0.000131249	0.00158638	1.27387
GO:0097451	glial limiting end-foot	cellular_component	0.000131249	0.00158638	1.27387
GO:2001238	positive regulation of extrinsic apoptotic signaling pathway	biological_process	0.000131249	0.00158638	1.27387
GO:0090090	negative regulation of canonical Wnt signaling pathway	biological_process	0.000132655	0.00160192	1.08794
GO:0005884	actin filament	cellular_component	0.000135869	0.00163923	1.11886
GO:0035331	negative regulation of hippo signaling	biological_process	0.000138714	0.00167203	1.23321
GO:0042127	regulation of cell proliferation	biological_process	0.000140277	0.00168932	1.08842
GO:0031672	A band	cellular_component	0.000141487	0.00170235	1.17484
GO:0032465	regulation of cytokinesis	biological_process	0.000142132	0.00170855	1.19154
GO:1901796	regulation of signal transduction by p53 class mediator	biological_process	0.000143487	0.00172328	1.09671
GO:0046982	protein heterodimerization activity	molecular_function	0.000144877	0.00173839	1.04868
GO:0016071	mRNA metabolic process	biological_process	0.000145868	0.00174554	1.25693
GO:0036066	protein O-linked fucosylation	biological_process	0.000145868	0.00174554	1.25693
GO:0045176	apical protein localization	biological_process	0.000145868	0.00174554	1.25693
GO:0021549	cerebellum development	biological_process	0.00015051	0.00175919	1.15416
GO:0001778	plasma membrane repair	biological_process	0.000151134	0.00175919	1.32808
GO:0002446	neutrophil mediated immunity	biological_process	0.000151134	0.00175919	1.32808
GO:0002606	positive regulation of dendritic cell antigen processing and presentation	biological_process	0.000151134	0.00175919	1.32808
GO:0003025	regulation of systemic arterial blood pressure by baroreceptor feedback	biological_process	0.000151134	0.00175919	1.32808
GO:0006584	catecholamine metabolic process	biological_process	0.000151134	0.00175919	1.32808
GO:0007100	mitotic centrosome separation	biological_process	0.000151134	0.00175919	1.32808
GO:0007178	transmembrane receptor protein serine/threonine kinase signaling pathway	biological_process	0.000151134	0.00175919	1.32808
GO:0008190	eukaryotic initiation factor 4E binding	molecular_function	0.000151134	0.00175919	1.32808
GO:0016554	cytidine to uridine editing	biological_process	0.000151134	0.00175919	1.32808
GO:0021563	glossopharyngeal nerve development	biological_process	0.000151134	0.00175919	1.32808
GO:0021564	vagus nerve development	biological_process	0.000151134	0.00175919	1.32808
GO:0023016	signal transduction by trans-phosphorylation	biological_process	0.000151134	0.00175919	1.32808
GO:0030003	cellular cation homeostasis	biological_process	0.000151134	0.00175919	1.32808
GO:0031102	neuron projection regeneration	biological_process	0.000151134	0.00175919	1.32808
GO:0033280	response to vitamin D	biological_process	0.000151134	0.00175919	1.32808
GO:0040011	locomotion	biological_process	0.000151134	0.00175919	1.32808
GO:0042045	epithelial fluid transport	biological_process	0.000151134	0.00175919	1.32808
GO:0044089	positive regulation of cellular component biogenesis	biological_process	0.000151134	0.00175919	1.32808
GO:0044327	dendritic spine head	cellular_component	0.000151134	0.00175919	1.32808
GO:0048096	chromatin-mediated maintenance of transcription	biological_process	0.000151134	0.00175919	1.32808
GO:0048842	positive regulation of axon extension involved in axon guidance	biological_process	0.000151134	0.00175919	1.32808
GO:0050877	nervous system process	biological_process	0.000151134	0.00175919	1.32808
GO:0050925	negative regulation of negative chemotaxis	biological_process	0.000151134	0.00175919	1.32808
GO:0060396	growth hormone receptor signaling pathway	biological_process	0.000151134	0.00175919	1.32808
GO:0071253	connexin binding	molecular_function	0.000151134	0.00175919	1.32808
GO:0072015	glomerular visceral epithelial cell development	biological_process	0.000151134	0.00175919	1.32808
GO:0090331	negative regulation of platelet aggregation	biological_process	0.000151134	0.00175919	1.32808
GO:0097195	pilomotor reflex	biological_process	0.000151134	0.00175919	1.32808
GO:1903599	positive regulation of autophagy of mitochondrion	biological_process	0.000151134	0.00175919	1.32808
GO:1905520	positive regulation of presynaptic active zone assembly	biological_process	0.000151134	0.00175919	1.32808
GO:0030838	positive regulation of actin filament polymerization	biological_process	0.000152973	0.00177613	1.13835
GO:0050890	cognition	biological_process	0.000152973	0.00177613	1.13835
GO:0005913	cell-cell adherens junction	cellular_component	0.000152992	0.00177613	1.09209
GO:0000407	phagophore assembly site	cellular_component	0.000155731	0.00180635	1.14538
GO:0048786	presynaptic active zone	cellular_component	0.000164	0.00190059	1.11226
GO:0045742	positive regulation of epidermal growth factor receptor signaling pathway	biological_process	0.000165825	0.00190335	1.2147
GO:0001946	lymphangiogenesis	biological_process	0.000165966	0.00190335	1.29487
GO:0006600	creatine metabolic process	biological_process	0.000165966	0.00190335	1.29487
GO:0015101	organic cation transmembrane transporter activity	molecular_function	0.000165966	0.00190335	1.29487
GO:0032453	histone demethylase activity (H3-K4 specific)	molecular_function	0.000165966	0.00190335	1.29487
GO:0034595	phosphatidylinositol phosphate 5-phosphatase activity	molecular_function	0.000165966	0.00190335	1.29487
GO:0035241	protein-arginine omega-N monomethyltransferase activity	molecular_function	0.000165966	0.00190335	1.29487
GO:0050966	detection of mechanical stimulus involved in sensory perception of pain	biological_process	0.000165966	0.00190335	1.29487
GO:0071787	endoplasmic reticulum tubular network formation	biological_process	0.000165966	0.00190335	1.29487
GO:0090403	oxidative stress-induced premature senescence	biological_process	0.000165966	0.00190335	1.29487
GO:1904424	regulation of GTP binding	biological_process	0.000165966	0.00190335	1.29487
GO:1905232	cellular response to L-glutamate	biological_process	0.000165966	0.00190335	1.29487
GO:0070375	ERK5 cascade	biological_process	0.000167665	0.00192118	1.27274
GO:0007413	axonal fasciculation	biological_process	0.000170209	0.00194863	1.19026
GO:0070936	protein K48-linked ubiquitination	biological_process	0.000170809	0.00195381	1.11648
GO:0030282	bone mineralization	biological_process	0.000171781	0.00196154	1.23184
GO:2001046	positive regulation of integrin-mediated signaling pathway	biological_process	0.000171781	0.00196154	1.23184
GO:1903078	positive regulation of protein localization to plasma membrane	biological_process	0.000172364	0.0019665	1.12496
GO:0050998	nitric-oxide synthase binding	molecular_function	0.000174565	0.00198989	1.20092
GO:0005829	cytosol	cellular_component	0.000176292	0.00200784	1.01105
GO:0030863	cortical cytoskeleton	cellular_component	0.000179322	0.0020406	1.14441
GO:0005251	delayed rectifier potassium channel activity	molecular_function	0.000183178	0.00207911	1.24239
GO:0005921	gap junction	cellular_component	0.000183178	0.00207911	1.24239
GO:1902894	negative regulation of pri-miRNA transcription from RNA polymerase II promoter	biological_process	0.000183178	0.00207911	1.24239
GO:0003334	keratinocyte development	biological_process	0.000183986	0.0020847	1.25563
GO:0036120	cellular response to platelet-derived growth factor stimulus	biological_process	0.000183986	0.0020847	1.25563
GO:0050731	positive regulation of peptidyl-tyrosine phosphorylation	biological_process	0.000189791	0.00214863	1.12943
GO:0048844	artery morphogenesis	biological_process	0.000190244	0.00215192	1.22183
GO:0033138	positive regulation of peptidyl-serine phosphorylation	biological_process	0.000193028	0.00218154	1.12669
GO:0000422	autophagy of mitochondrion	biological_process	0.000195721	0.00221009	1.13835
GO:0001666	response to hypoxia	biological_process	0.000197188	0.00222476	1.1005
GO:0001104	RNA polymerase II transcription cofactor activity	molecular_function	0.000200219	0.00222682	1.16565
GO:0007406	negative regulation of neuroblast proliferation	biological_process	0.000200739	0.00222682	1.32808
GO:0008483	transaminase activity	molecular_function	0.000200739	0.00222682	1.32808
GO:0016080	synaptic vesicle targeting	biological_process	0.000200739	0.00222682	1.32808
GO:0019908	nuclear cyclin-dependent protein kinase holoenzyme complex	cellular_component	0.000200739	0.00222682	1.32808
GO:0030697	S-adenosylmethionine-dependent tRNA (m5U54) methyltransferase activity	molecular_function	0.000200739	0.00222682	1.32808
GO:0039530	MDA-5 signaling pathway	biological_process	0.000200739	0.00222682	1.32808
GO:0042551	neuron maturation	biological_process	0.000200739	0.00222682	1.32808
GO:0043533	inositol 1,3,4,5 tetrakisphosphate binding	molecular_function	0.000200739	0.00222682	1.32808
GO:0043931	ossification involved in bone maturation	biological_process	0.000200739	0.00222682	1.32808
GO:0044351	macropinocytosis	biological_process	0.000200739	0.00222682	1.32808
GO:0046624	sphingolipid transporter activity	molecular_function	0.000200739	0.00222682	1.32808
GO:0070905	serine binding	molecular_function	0.000200739	0.00222682	1.32808
GO:0086018	SA node cell to atrial cardiac muscle cell signaling	biological_process	0.000200739	0.00222682	1.32808
GO:0086027	AV node cell to bundle of His cell signaling	biological_process	0.000200739	0.00222682	1.32808
GO:0097512	cardiac myofibril	cellular_component	0.000200739	0.00222682	1.32808
GO:1904357	negative regulation of telomere maintenance via telomere lengthening	biological_process	0.000200739	0.00222682	1.32808
GO:1904385	cellular response to angiotensin	biological_process	0.000200739	0.00222682	1.32808
GO:1904637	cellular response to ionomycin	biological_process	0.000200739	0.00222682	1.32808
GO:1990393	3M complex	cellular_component	0.000200739	0.00222682	1.32808
GO:0000827	inositol-1,3,4,5,6-pentakisphosphate kinase activity	molecular_function	0.000203635	0.00225139	1.18894
GO:0000829	inositol heptakisphosphate kinase activity	molecular_function	0.000203635	0.00225139	1.18894
GO:0006352	DNA-templated transcription, initiation	biological_process	0.000203635	0.00225139	1.18894
GO:0050699	WW domain binding	molecular_function	0.000203635	0.00225139	1.18894
GO:0048286	lung alveolus development	biological_process	0.000208898	0.00230765	1.20595
GO:0005086	ARF guanyl-nucleotide exchange factor activity	molecular_function	0.000210171	0.00231978	1.17567
GO:0001669	acrosomal vesicle	cellular_component	0.000211878	0.00233666	1.08707
GO:0005105	type 1 fibroblast growth factor receptor binding	molecular_function	0.00021402	0.0023544	1.27156
GO:0043405	regulation of MAP kinase activity	biological_process	0.00021402	0.0023544	1.27156
GO:0070848	response to growth factor	biological_process	0.00021402	0.0023544	1.27156
GO:0008306	associative learning	biological_process	0.000215322	0.00236086	1.29402
GO:0016810	hydrolase activity, acting on carbon-nitrogen (but not peptide) bonds	molecular_function	0.000215322	0.00236086	1.29402
GO:0035265	organ growth	biological_process	0.000215322	0.00236086	1.29402
GO:1902004	positive regulation of amyloid-beta formation	biological_process	0.000215322	0.00236086	1.29402
GO:0001105	RNA polymerase II transcription coactivator activity	molecular_function	0.000216207	0.0023686	1.16831
GO:0005875	microtubule associated complex	cellular_component	0.000223107	0.00244016	1.15377
GO:2001237	negative regulation of extrinsic apoptotic signaling pathway	biological_process	0.000223107	0.00244016	1.15377
GO:0031625	ubiquitin protein ligase binding	molecular_function	0.000224695	0.00245549	1.05677
GO:0048667	cell morphogenesis involved in neuron differentiation	biological_process	0.0002285	0.00249501	1.24099
GO:0051879	Hsp90 protein binding	molecular_function	0.000228758	0.00249577	1.1356
GO:0032026	response to magnesium ion	biological_process	0.000231854	0.00252745	1.25429
GO:0009267	cellular response to starvation	biological_process	0.000248803	0.00270999	1.12254
GO:0008285	negative regulation of cell proliferation	biological_process	0.000249117	0.00271118	1.04892
GO:0010975	regulation of neuron projection development	biological_process	0.000254026	0.00276233	1.19815
GO:0006509	membrane protein ectodomain proteolysis	biological_process	0.000262658	0.0028515	1.22897
GO:0030306	ADP-ribosylation factor binding	molecular_function	0.000262658	0.0028515	1.22897
GO:0006298	mismatch repair	biological_process	0.000266624	0.00285935	1.32808
GO:0009063	cellular amino acid catabolic process	biological_process	0.000266624	0.00285935	1.32808
GO:0031434	mitogen-activated protein kinase kinase binding	molecular_function	0.000266624	0.00285935	1.32808
GO:0043229	intracellular organelle	cellular_component	0.000266624	0.00285935	1.32808
GO:0043497	regulation of protein heterodimerization activity	biological_process	0.000266624	0.00285935	1.32808
GO:0043951	negative regulation of cAMP-mediated signaling	biological_process	0.000266624	0.00285935	1.32808
GO:0044275	cellular carbohydrate catabolic process	biological_process	0.000266624	0.00285935	1.32808
GO:0045351	type I interferon biosynthetic process	biological_process	0.000266624	0.00285935	1.32808
GO:0047894	flavonol 3-sulfotransferase activity	molecular_function	0.000266624	0.00285935	1.32808
GO:0048407	platelet-derived growth factor binding	molecular_function	0.000266624	0.00285935	1.32808
GO:0050023	L-fuconate dehydratase activity	molecular_function	0.000266624	0.00285935	1.32808
GO:0060372	regulation of atrial cardiac muscle cell membrane repolarization	biological_process	0.000266624	0.00285935	1.32808
GO:0060712	spongiotrophoblast layer development	biological_process	0.000266624	0.00285935	1.32808
GO:0071800	podosome assembly	biological_process	0.000266624	0.00285935	1.32808
GO:2000576	positive regulation of microtubule motor activity	biological_process	0.000266624	0.00285935	1.32808
GO:0031065	positive regulation of histone deacetylation	biological_process	0.000272971	0.00292267	1.27033
GO:0050918	positive chemotaxis	biological_process	0.000272971	0.00292267	1.27033
GO:0030331	estrogen receptor binding	molecular_function	0.000273679	0.00292788	1.16997
GO:0016191	synaptic vesicle uncoating	biological_process	0.000279198	0.00297249	1.29313
GO:0030166	proteoglycan biosynthetic process	biological_process	0.000279198	0.00297249	1.29313
GO:0036057	slit diaphragm	cellular_component	0.000279198	0.00297249	1.29313
GO:0048149	behavioral response to ethanol	biological_process	0.000279198	0.00297249	1.29313
GO:0070740	tubulin-glutamic acid ligase activity	molecular_function	0.000279198	0.00297249	1.29313
GO:2000651	positive regulation of sodium ion transmembrane transporter activity	biological_process	0.000279198	0.00297249	1.29313
GO:0005847	mRNA cleavage and polyadenylation specificity factor complex	cellular_component	0.000284753	0.00301706	1.23954
GO:0034993	LINC complex	cellular_component	0.000284753	0.00301706	1.23954
GO:0070410	co-SMAD binding	molecular_function	0.000284753	0.00301706	1.23954
GO:0086014	atrial cardiac muscle cell action potential	biological_process	0.000284753	0.00301706	1.23954
GO:1905394	retromer complex binding	molecular_function	0.000284753	0.00301706	1.23954
GO:2000811	negative regulation of anoikis	biological_process	0.000284753	0.00301706	1.23954
GO:0035102	PRC1 complex	cellular_component	0.000291903	0.00308786	1.2529
GO:0051646	mitochondrion localization	biological_process	0.000291903	0.00308786	1.2529
GO:0005246	calcium channel regulator activity	molecular_function	0.000293971	0.00310726	1.14489
GO:0055072	iron ion homeostasis	biological_process	0.000300044	0.00316892	1.15156
GO:0006275	regulation of DNA replication	biological_process	0.000300502	0.00317122	1.2104
GO:0045724	positive regulation of cilium assembly	biological_process	0.000305963	0.00322627	1.19673
GO:0042327	positive regulation of phosphorylation	biological_process	0.000306537	0.00322718	1.20308
GO:0045821	positive regulation of glycolytic process	biological_process	0.000306537	0.00322718	1.20308
GO:0005737	cytoplasm	cellular_component	0.000309595	0.00325678	1.01157
GO:0071364	cellular response to epidermal growth factor stimulus	biological_process	0.000312569	0.00328545	1.17663
GO:0000123	histone acetyltransferase complex	cellular_component	0.0003134	0.00329157	1.15642
GO:0005280	hydrogen:amino acid symporter activity	molecular_function	0.000324283	0.00340317	1.22746
GO:0003713	transcription coactivator activity	molecular_function	0.000326258	0.00342118	1.05942
GO:0008083	growth factor activity	molecular_function	0.00033049	0.00346044	1.11043
GO:0051393	alpha-actinin binding	molecular_function	0.0003306	0.00346044	1.18051
GO:0042113	B cell activation	biological_process	0.000331049	0.00346044	1.15333
GO:0098794	postsynapse	cellular_component	0.000331049	0.00346044	1.15333
GO:0001938	positive regulation of endothelial cell proliferation	biological_process	0.000343625	0.00358907	1.15853
GO:0061631	ubiquitin conjugating enzyme activity	molecular_function	0.000346622	0.0036132	1.18485
GO:0009931	calcium-dependent protein serine/threonine kinase activity	molecular_function	0.000347868	0.0036132	1.26905
GO:0030914	STAGA complex	cellular_component	0.000347868	0.0036132	1.26905
GO:0035925	mRNA 3'-UTR AU-rich region binding	molecular_function	0.000347868	0.0036132	1.26905
GO:0000993	RNA polymerase II core binding	molecular_function	0.000350742	0.0036132	1.2174
GO:0044306	neuron projection terminus	cellular_component	0.000350742	0.0036132	1.2174
GO:0001915	negative regulation of T cell mediated cytotoxicity	biological_process	0.000354133	0.0036132	1.32808
GO:0005853	eukaryotic translation elongation factor 1 complex	cellular_component	0.000354133	0.0036132	1.32808
GO:0008588	release of cytoplasmic sequestered NF-kappaB	biological_process	0.000354133	0.0036132	1.32808
GO:0010650	positive regulation of cell communication by electrical coupling	biological_process	0.000354133	0.0036132	1.32808
GO:0017136	NAD-dependent histone deacetylase activity	molecular_function	0.000354133	0.0036132	1.32808
GO:0023041	neuronal signal transduction	biological_process	0.000354133	0.0036132	1.32808
GO:0030020	extracellular matrix structural constituent conferring tensile strength	molecular_function	0.000354133	0.0036132	1.32808
GO:0033687	osteoblast proliferation	biological_process	0.000354133	0.0036132	1.32808
GO:0034164	negative regulation of toll-like receptor 9 signaling pathway	biological_process	0.000354133	0.0036132	1.32808
GO:0035137	hindlimb morphogenesis	biological_process	0.000354133	0.0036132	1.32808
GO:0044354	macropinosome	cellular_component	0.000354133	0.0036132	1.32808
GO:0045577	regulation of B cell differentiation	biological_process	0.000354133	0.0036132	1.32808
GO:0048496	maintenance of animal organ identity	biological_process	0.000354133	0.0036132	1.32808
GO:0050794	regulation of cellular process	biological_process	0.000354133	0.0036132	1.32808
GO:0050810	regulation of steroid biosynthetic process	biological_process	0.000354133	0.0036132	1.32808
GO:0060351	cartilage development involved in endochondral bone morphogenesis	biological_process	0.000354133	0.0036132	1.32808
GO:0071359	cellular response to dsRNA	biological_process	0.000354133	0.0036132	1.32808
GO:0072660	maintenance of protein location in plasma membrane	biological_process	0.000354133	0.0036132	1.32808
GO:0090037	positive regulation of protein kinase C signaling	biological_process	0.000354133	0.0036132	1.32808
GO:0102953	hypoglycin A gamma-glutamyl transpeptidase activity	molecular_function	0.000354133	0.0036132	1.32808
GO:0103068	leukotriene C4 gamma-glutamyl transferase activity	molecular_function	0.000354133	0.0036132	1.32808
GO:1900827	positive regulation of membrane depolarization during cardiac muscle cell action potential	biological_process	0.000354133	0.0036132	1.32808
GO:1903142	positive regulation of establishment of endothelial barrier	biological_process	0.000354133	0.0036132	1.32808
GO:1904100	positive regulation of protein O-linked glycosylation	biological_process	0.000354133	0.0036132	1.32808
GO:0043679	axon terminus	cellular_component	0.000355776	0.00362716	1.12509
GO:0003950	NAD+ ADP-ribosyltransferase activity	molecular_function	0.000358783	0.003655	1.13939
GO:0001755	neural crest cell migration	biological_process	0.000359568	0.00366018	1.18973
GO:0001516	prostaglandin biosynthetic process	biological_process	0.000361806	0.00367447	1.29218
GO:0007143	female meiotic nuclear division	biological_process	0.000361806	0.00367447	1.29218
GO:0035751	regulation of lysosomal lumen pH	biological_process	0.000361806	0.00367447	1.29218
GO:0008191	metalloendopeptidase inhibitor activity	molecular_function	0.000367148	0.00372301	1.25146
GO:0048156	tau protein binding	molecular_function	0.000367148	0.00372301	1.25146
GO:0035914	skeletal muscle cell differentiation	biological_process	0.000369859	0.00374762	1.17529
GO:0010800	positive regulation of peptidyl-threonine phosphorylation	biological_process	0.000370736	0.00374789	1.20159
GO:0030676	Rac guanyl-nucleotide exchange factor activity	molecular_function	0.000370736	0.00374789	1.20159
GO:0044291	cell-cell contact zone	cellular_component	0.000370736	0.00374789	1.20159
GO:0010595	positive regulation of endothelial cell migration	biological_process	0.000375695	0.00379512	1.16084
GO:0007015	actin filament organization	biological_process	0.00039147	0.00395146	1.09204
GO:0004709	MAP kinase kinase kinase activity	molecular_function	0.000392485	0.00395567	1.17913
GO:0071526	semaphorin-plexin signaling pathway	biological_process	0.000392485	0.00395567	1.17913
GO:0030279	negative regulation of ossification	biological_process	0.000399937	0.00401547	1.22592
GO:0030318	melanocyte differentiation	biological_process	0.000399937	0.00401547	1.22592
GO:0030898	actin-dependent ATPase activity	molecular_function	0.000399937	0.00401547	1.22592
GO:0032727	positive regulation of interferon-alpha production	biological_process	0.000399937	0.00401547	1.22592
GO:0051209	release of sequestered calcium ion into cytosol	biological_process	0.000399937	0.00401547	1.22592
GO:0090307	mitotic spindle assembly	biological_process	0.000400909	0.00402217	1.14049
GO:0042043	neurexin family protein binding	molecular_function	0.000402113	0.00403119	1.1493
GO:0060173	limb development	biological_process	0.000418748	0.00419478	1.1466
GO:1904263	positive regulation of TORC1 signaling	biological_process	0.000429153	0.00429575	1.21584
GO:0043280	positive regulation of cysteine-type endopeptidase activity involved in apoptotic process	biological_process	0.000430186	0.00429959	1.18828
GO:0050919	negative chemotaxis	biological_process	0.000430186	0.00429959	1.18828
GO:0004896	cytokine receptor activity	molecular_function	0.000437204	0.00436643	1.17392
GO:0002244	hematopoietic progenitor cell differentiation	biological_process	0.000438259	0.00437366	1.10602
GO:0003382	epithelial cell morphogenesis	biological_process	0.000440841	0.00438057	1.23648
GO:0006853	carnitine shuttle	biological_process	0.000440841	0.00438057	1.23648
GO:0051256	mitotic spindle midzone assembly	biological_process	0.000440841	0.00438057	1.23648
GO:0001502	cartilage condensation	biological_process	0.000442927	0.00438057	1.26771
GO:0004329	formate-tetrahydrofolate ligase activity	molecular_function	0.000442927	0.00438057	1.26771
GO:0007600	sensory perception	biological_process	0.000442927	0.00438057	1.26771
GO:0010955	negative regulation of protein processing	biological_process	0.000442927	0.00438057	1.26771
GO:0021707	cerebellar granule cell differentiation	biological_process	0.000442927	0.00438057	1.26771
GO:0048333	mesodermal cell differentiation	biological_process	0.000442927	0.00438057	1.26771
GO:0055059	asymmetric neuroblast division	biological_process	0.000442927	0.00438057	1.26771
GO:0070544	histone H3-K36 demethylation	biological_process	0.000442927	0.00438057	1.26771
GO:2000813	negative regulation of barbed-end actin filament capping	biological_process	0.000442927	0.00438057	1.26771
GO:0008757	S-adenosylmethionine-dependent methyltransferase activity	molecular_function	0.00044429	0.00439076	1.20734
GO:0010719	negative regulation of epithelial to mesenchymal transition	biological_process	0.000447891	0.00441975	1.20007
GO:2000772	regulation of cellular senescence	biological_process	0.000447891	0.00441975	1.20007
GO:0061003	positive regulation of dendritic spine morphogenesis	biological_process	0.000452058	0.00445754	1.12611
GO:0060337	type I interferon signaling pathway	biological_process	0.000455582	0.00448894	1.12199
GO:0052658	inositol-1,4,5-trisphosphate 5-phosphatase activity	molecular_function	0.000461327	0.0045135	1.24995
GO:0004571	mannosyl-oligosaccharide 1,2-alpha-mannosidase activity	molecular_function	0.000468561	0.0045135	1.29118
GO:0008429	phosphatidylethanolamine binding	molecular_function	0.000468561	0.0045135	1.29118
GO:0021554	optic nerve development	biological_process	0.000468561	0.0045135	1.29118
GO:0032229	negative regulation of synaptic transmission, GABAergic	biological_process	0.000468561	0.0045135	1.29118
GO:0032434	regulation of proteasomal ubiquitin-dependent protein catabolic process	biological_process	0.000468561	0.0045135	1.29118
GO:0071286	cellular response to magnesium ion	biological_process	0.000468561	0.0045135	1.29118
GO:0097149	centralspindlin complex	cellular_component	0.000468561	0.0045135	1.29118
GO:0099055	integral component of postsynaptic membrane	cellular_component	0.000468561	0.0045135	1.29118
GO:1903003	positive regulation of protein deubiquitination	biological_process	0.000468561	0.0045135	1.29118
GO:1904264	ubiquitin protein ligase activity involved in ERAD pathway	molecular_function	0.000468561	0.0045135	1.29118
GO:0000220	vacuolar proton-transporting V-type ATPase, V0 domain	cellular_component	0.000470362	0.0045135	1.32808
GO:0000578	embryonic axis specification	biological_process	0.000470362	0.0045135	1.32808
GO:0001733	galactosylceramide sulfotransferase activity	molecular_function	0.000470362	0.0045135	1.32808
GO:0002767	immune response-inhibiting cell surface receptor signaling pathway	biological_process	0.000470362	0.0045135	1.32808
GO:0002944	cyclin K-CDK12 complex	cellular_component	0.000470362	0.0045135	1.32808
GO:0003376	sphingosine-1-phosphate signaling pathway	biological_process	0.000470362	0.0045135	1.32808
GO:0005944	phosphatidylinositol 3-kinase complex, class IB	cellular_component	0.000470362	0.0045135	1.32808
GO:0005955	calcineurin complex	cellular_component	0.000470362	0.0045135	1.32808
GO:0006561	proline biosynthetic process	biological_process	0.000470362	0.0045135	1.32808
GO:0010225	response to UV-C	biological_process	0.000470362	0.0045135	1.32808
GO:0030618	transforming growth factor beta receptor, pathway-specific cytoplasmic mediator activity	molecular_function	0.000470362	0.0045135	1.32808
GO:0032717	negative regulation of interleukin-8 production	biological_process	0.000470362	0.0045135	1.32808
GO:0034185	apolipoprotein binding	molecular_function	0.000470362	0.0045135	1.32808
GO:0036465	synaptic vesicle recycling	biological_process	0.000470362	0.0045135	1.32808
GO:0042053	regulation of dopamine metabolic process	biological_process	0.000470362	0.0045135	1.32808
GO:0048789	cytoskeletal matrix organization at active zone	biological_process	0.000470362	0.0045135	1.32808
GO:0051152	positive regulation of smooth muscle cell differentiation	biological_process	0.000470362	0.0045135	1.32808
GO:0060171	stereocilium membrane	cellular_component	0.000470362	0.0045135	1.32808
GO:0070816	phosphorylation of RNA polymerase II C-terminal domain	biological_process	0.000470362	0.0045135	1.32808
GO:0071141	SMAD protein complex	cellular_component	0.000470362	0.0045135	1.32808
GO:0071467	cellular response to pH	biological_process	0.000470362	0.0045135	1.32808
GO:0097115	neurexin clustering involved in presynaptic membrane assembly	biological_process	0.000470362	0.0045135	1.32808
GO:0098942	retrograde trans-synaptic signaling by trans-synaptic protein complex	biological_process	0.000470362	0.0045135	1.32808
GO:0098957	anterograde axonal transport of mitochondrion	biological_process	0.000470362	0.0045135	1.32808
GO:1905037	autophagosome organization	biological_process	0.000470362	0.0045135	1.32808
GO:0003279	cardiac septum development	biological_process	0.000492697	0.00471072	1.22432
GO:0005355	glucose transmembrane transporter activity	molecular_function	0.000492697	0.00471072	1.22432
GO:0043473	pigmentation	biological_process	0.000492697	0.00471072	1.22432
GO:0048565	digestive tract development	biological_process	0.000492697	0.00471072	1.22432
GO:1901185	negative regulation of ERBB signaling pathway	biological_process	0.000492697	0.00471072	1.22432
GO:0031519	PcG protein complex	cellular_component	0.000516279	0.00493263	1.17253
GO:0005496	steroid binding	molecular_function	0.000521358	0.00497756	1.16479
GO:0034113	heterotypic cell-cell adhesion	biological_process	0.000524503	0.00500397	1.21424
GO:0000723	telomere maintenance	biological_process	0.000539321	0.00514163	1.20575
GO:0060292	long term synaptic depression	biological_process	0.000540498	0.00514914	1.19851
GO:0045111	intermediate filament cytoskeleton	cellular_component	0.000547271	0.00520954	1.11165
GO:0004629	phospholipase C activity	molecular_function	0.000547626	0.00520954	1.23488
GO:0044322	endoplasmic reticulum quality control compartment	cellular_component	0.000551444	0.00524209	1.1763
GO:0016740	transferase activity	molecular_function	0.00055482	0.00527039	1.08799
GO:0050870	positive regulation of T cell activation	biological_process	0.000560125	0.00531697	1.16076
GO:0001967	suckling behavior	biological_process	0.000563447	0.00532176	1.2663
GO:0003016	respiratory system process	biological_process	0.000563447	0.00532176	1.2663
GO:0009257	10-formyltetrahydrofolate biosynthetic process	biological_process	0.000563447	0.00532176	1.2663
GO:0031076	embryonic camera-type eye development	biological_process	0.000563447	0.00532176	1.2663
GO:0032591	dendritic spine membrane	cellular_component	0.000563447	0.00532176	1.2663
GO:0035136	forelimb morphogenesis	biological_process	0.000563447	0.00532176	1.2663
GO:0090140	regulation of mitochondrial fission	biological_process	0.000563447	0.00532176	1.2663
GO:0009888	tissue development	biological_process	0.00057906	0.00546142	1.24839
GO:0046855	inositol phosphate dephosphorylation	biological_process	0.00057906	0.00546142	1.24839
GO:0045165	cell fate commitment	biological_process	0.000584496	0.00550876	1.18051
GO:0016021	integral component of membrane	cellular_component	0.000585604	0.00551527	1.01359
GO:0005635	nuclear envelope	cellular_component	0.000597755	0.0056257	1.06246
GO:0042832	defense response to protozoan	biological_process	0.00060628	0.00568699	1.22267
GO:0008894	guanosine-5'-triphosphate,3'-diphosphate diphosphatase activity	molecular_function	0.000606417	0.00568699	1.29013
GO:0019166	trans-2-enoyl-CoA reductase (NADPH) activity	molecular_function	0.000606417	0.00568699	1.29013
GO:0051004	regulation of lipoprotein lipase activity	biological_process	0.000606417	0.00568699	1.29013
GO:0061045	negative regulation of wound healing	biological_process	0.000606417	0.00568699	1.29013
GO:0005220	inositol 1,4,5-trisphosphate-sensitive calcium-release channel activity	molecular_function	0.000624735	0.00574071	1.32808
GO:0009649	entrainment of circadian clock	biological_process	0.000624735	0.00574071	1.32808
GO:0010226	response to lithium ion	biological_process	0.000624735	0.00574071	1.32808
GO:0010485	H4 histone acetyltransferase activity	molecular_function	0.000624735	0.00574071	1.32808
GO:0014063	negative regulation of serotonin secretion	biological_process	0.000624735	0.00574071	1.32808
GO:0015137	citrate transmembrane transporter activity	molecular_function	0.000624735	0.00574071	1.32808
GO:0015166	polyol transmembrane transporter activity	molecular_function	0.000624735	0.00574071	1.32808
GO:0015280	ligand-gated sodium channel activity	molecular_function	0.000624735	0.00574071	1.32808
GO:0021523	somatic motor neuron differentiation	biological_process	0.000624735	0.00574071	1.32808
GO:0031467	Cul7-RING ubiquitin ligase complex	cellular_component	0.000624735	0.00574071	1.32808
GO:0032252	secretory granule localization	biological_process	0.000624735	0.00574071	1.32808
GO:0032494	response to peptidoglycan	biological_process	0.000624735	0.00574071	1.32808
GO:0043553	negative regulation of phosphatidylinositol 3-kinase activity	biological_process	0.000624735	0.00574071	1.32808
GO:0043576	regulation of respiratory gaseous exchange	biological_process	0.000624735	0.00574071	1.32808
GO:0044323	retinoic acid-responsive element binding	molecular_function	0.000624735	0.00574071	1.32808
GO:0044877	macromolecular complex binding	molecular_function	0.000624735	0.00574071	1.32808
GO:0045545	syndecan binding	molecular_function	0.000624735	0.00574071	1.32808
GO:0046636	negative regulation of alpha-beta T cell activation	biological_process	0.000624735	0.00574071	1.32808
GO:0046870	cadmium ion binding	molecular_function	0.000624735	0.00574071	1.32808
GO:0048669	collateral sprouting in absence of injury	biological_process	0.000624735	0.00574071	1.32808
GO:0050119	N-acetylglucosamine deacetylase activity	molecular_function	0.000624735	0.00574071	1.32808
GO:0051295	establishment of meiotic spindle localization	biological_process	0.000624735	0.00574071	1.32808
GO:0070213	protein auto-ADP-ribosylation	biological_process	0.000624735	0.00574071	1.32808
GO:0070649	formin-nucleated actin cable assembly	biological_process	0.000624735	0.00574071	1.32808
GO:0071870	cellular response to catecholamine stimulus	biological_process	0.000624735	0.00574071	1.32808
GO:0097553	calcium ion transmembrane import into cytosol	biological_process	0.000624735	0.00574071	1.32808
GO:1903363	negative regulation of cellular protein catabolic process	biological_process	0.000624735	0.00574071	1.32808
GO:1904628	cellular response to phorbol 13-acetate 12-myristate	biological_process	0.000624735	0.00574071	1.32808
GO:1990502	dense core granule maturation	biological_process	0.000624735	0.00574071	1.32808
GO:0001822	kidney development	biological_process	0.00062971	0.0057824	1.10123
GO:0008645	hexose transport	biological_process	0.000636992	0.00584115	1.19069
GO:0050321	tau-protein kinase activity	molecular_function	0.000636992	0.00584115	1.19069
GO:0097178	ruffle assembly	biological_process	0.000640298	0.0058674	1.21259
GO:0042753	positive regulation of circadian rhythm	biological_process	0.000651506	0.00596184	1.19691
GO:0048557	embryonic digestive tract morphogenesis	biological_process	0.000651506	0.00596184	1.19691
GO:0018026	peptidyl-lysine monomethylation	biological_process	0.000653924	0.00597157	1.20412
GO:0097038	perinuclear endoplasmic reticulum	cellular_component	0.000653924	0.00597157	1.20412
GO:2000009	negative regulation of protein localization to cell surface	biological_process	0.000653924	0.00597157	1.20412
GO:0006493	protein O-linked glycosylation	biological_process	0.000660913	0.00603123	1.15038
GO:0048146	positive regulation of fibroblast proliferation	biological_process	0.000694188	0.00632615	1.17901
GO:0060135	maternal process involved in female pregnancy	biological_process	0.000694188	0.00632615	1.17901
GO:0012505	endomembrane system	cellular_component	0.000697275	0.00634991	1.066
GO:0014894	response to denervation involved in regulation of muscle adaptation	biological_process	0.00071608	0.00650772	1.26483
GO:0060349	bone morphogenesis	biological_process	0.00071608	0.00650772	1.26483
GO:0061589	calcium activated phosphatidylserine scrambling	biological_process	0.00071608	0.00650772	1.26483
GO:0060124	positive regulation of growth hormone secretion	biological_process	0.000726056	0.00659385	1.24676
GO:0032526	response to retinoic acid	biological_process	0.000731843	0.00664184	1.18372
GO:0019904	protein domain specific binding	molecular_function	0.000735813	0.00667329	1.05443
GO:0016322	neuron remodeling	biological_process	0.000745175	0.00674894	1.22097
GO:0043274	phospholipase binding	molecular_function	0.000745175	0.00674894	1.22097
GO:0042787	protein ubiquitination involved in ubiquitin-dependent protein catabolic process	biological_process	0.000746859	0.00675956	1.06565
GO:0045736	negative regulation of cyclin-dependent protein serine/threonine kinase activity	biological_process	0.000763002	0.00690094	1.18909
GO:0035584	calcium-mediated signaling using intracellular calcium source	biological_process	0.00077145	0.00697258	1.17335
GO:0019933	cAMP-mediated signaling	biological_process	0.000774879	0.00699879	1.13721
GO:0008349	MAP kinase kinase kinase kinase activity	molecular_function	0.00077907	0.00703184	1.16498
GO:0043666	regulation of phosphoprotein phosphatase activity	biological_process	0.000780732	0.00704203	1.21089
GO:0004520	endodeoxyribonuclease activity	molecular_function	0.000784286	0.00704623	1.28901
GO:0010042	response to manganese ion	biological_process	0.000784286	0.00704623	1.28901
GO:0045630	positive regulation of T-helper 2 cell differentiation	biological_process	0.000784286	0.00704623	1.28901
GO:0060413	atrial septum morphogenesis	biological_process	0.000784286	0.00704623	1.28901
GO:0006307	DNA dealkylation involved in DNA repair	biological_process	0.000784394	0.00704623	1.19527
GO:0040029	regulation of gene expression, epigenetic	biological_process	0.000784394	0.00704623	1.19527
GO:0031527	filopodium membrane	cellular_component	0.00079194	0.00710436	1.20245
GO:0042592	homeostatic process	biological_process	0.00079194	0.00710436	1.20245
GO:0006260	DNA replication	biological_process	0.000810609	0.00726691	1.08902
GO:0002335	mature B cell differentiation	biological_process	0.000829771	0.00727591	1.32808
GO:0002380	immunoglobulin secretion involved in immune response	biological_process	0.000829771	0.00727591	1.32808
GO:0006575	cellular modified amino acid metabolic process	biological_process	0.000829771	0.00727591	1.32808
GO:0010544	negative regulation of platelet activation	biological_process	0.000829771	0.00727591	1.32808
GO:0019800	peptide cross-linking via chondroitin 4-sulfate glycosaminoglycan	biological_process	0.000829771	0.00727591	1.32808
GO:0021842	chemorepulsion involved in interneuron migration from the subpallium to the cortex	biological_process	0.000829771	0.00727591	1.32808
GO:0021955	central nervous system neuron axonogenesis	biological_process	0.000829771	0.00727591	1.32808
GO:0021956	central nervous system interneuron axonogenesis	biological_process	0.000829771	0.00727591	1.32808
GO:0023019	signal transduction involved in regulation of gene expression	biological_process	0.000829771	0.00727591	1.32808
GO:0031274	positive regulation of pseudopodium assembly	biological_process	0.000829771	0.00727591	1.32808
GO:0031547	brain-derived neurotrophic factor receptor signaling pathway	biological_process	0.000829771	0.00727591	1.32808
GO:0033353	S-adenosylmethionine cycle	biological_process	0.000829771	0.00727591	1.32808
GO:0035051	cardiocyte differentiation	biological_process	0.000829771	0.00727591	1.32808
GO:0042088	T-helper 1 type immune response	biological_process	0.000829771	0.00727591	1.32808
GO:0042584	chromaffin granule membrane	cellular_component	0.000829771	0.00727591	1.32808
GO:0043551	regulation of phosphatidylinositol 3-kinase activity	biological_process	0.000829771	0.00727591	1.32808
GO:0044614	nuclear pore cytoplasmic filaments	cellular_component	0.000829771	0.00727591	1.32808
GO:0046726	positive regulation by virus of viral protein levels in host cell	biological_process	0.000829771	0.00727591	1.32808
GO:0047312	L-phenylalanine:pyruvate aminotransferase activity	molecular_function	0.000829771	0.00727591	1.32808
GO:0047316	glutamine-phenylpyruvate transaminase activity	molecular_function	0.000829771	0.00727591	1.32808
GO:0047945	L-glutamine:pyruvate aminotransferase activity	molecular_function	0.000829771	0.00727591	1.32808
GO:0048858	cell projection morphogenesis	biological_process	0.000829771	0.00727591	1.32808
GO:0050891	multicellular organismal water homeostasis	biological_process	0.000829771	0.00727591	1.32808
GO:0052918	dol-P-Man:Man(8)GlcNAc(2)-PP-Dol alpha-1,2-mannosyltransferase activity	molecular_function	0.000829771	0.00727591	1.32808
GO:0052926	dol-P-Man:Man(6)GlcNAc(2)-PP-Dol alpha-1,2-mannosyltransferase activity	molecular_function	0.000829771	0.00727591	1.32808
GO:0071321	cellular response to cGMP	biological_process	0.000829771	0.00727591	1.32808
GO:0097197	tetraspanin-enriched microdomain	cellular_component	0.000829771	0.00727591	1.32808
GO:1901727	positive regulation of histone deacetylase activity	biological_process	0.000829771	0.00727591	1.32808
GO:1904886	beta-catenin destruction complex disassembly	biological_process	0.000829771	0.00727591	1.32808
GO:1990926	short-term synaptic potentiation	biological_process	0.000829771	0.00727591	1.32808
GO:2000391	positive regulation of neutrophil extravasation	biological_process	0.000829771	0.00727591	1.32808
GO:2000773	negative regulation of cellular senescence	biological_process	0.000829771	0.00727591	1.32808
GO:2001183	negative regulation of interleukin-12 secretion	biological_process	0.000829771	0.00727591	1.32808
GO:0032982	myosin filament	cellular_component	0.000842172	0.00736998	1.23149
GO:0048741	skeletal muscle fiber development	biological_process	0.000842172	0.00736998	1.23149
GO:0050710	negative regulation of cytokine secretion	biological_process	0.000842172	0.00736998	1.23149
GO:0006874	cellular calcium ion homeostasis	biological_process	0.000871752	0.00762379	1.10368
GO:0007162	negative regulation of cell adhesion	biological_process	0.000902418	0.00788676	1.13391
GO:0045582	positive regulation of T cell differentiation	biological_process	0.000909157	0.00792637	1.26329
GO:0071816	tail-anchored membrane protein insertion into ER membrane	biological_process	0.000909157	0.00792637	1.26329
GO:0005272	sodium channel activity	molecular_function	0.000909348	0.00792637	1.24507
GO:0031080	nuclear pore outer ring	cellular_component	0.000909348	0.00792637	1.24507
GO:0048589	developmental growth	biological_process	0.000912864	0.00795178	1.18746
GO:0005044	scavenger receptor activity	molecular_function	0.00091784	0.00798986	1.14489
GO:0004407	histone deacetylase activity	molecular_function	0.000919772	0.00800141	1.10592
GO:0016235	aggresome	cellular_component	0.000935174	0.00813005	1.10673
GO:0046580	negative regulation of Ras protein signal transduction	biological_process	0.000938327	0.0081521	1.15306
GO:0030099	myeloid cell differentiation	biological_process	0.000950806	0.00825509	1.20914
GO:0060045	positive regulation of cardiac muscle cell proliferation	biological_process	0.000957924	0.00830598	1.20073
GO:0097060	synaptic membrane	cellular_component	0.000957924	0.00830598	1.20073
GO:0031648	protein destabilization	biological_process	0.000975871	0.00845051	1.1759
GO:2000369	regulation of clathrin-dependent endocytosis	biological_process	0.000975871	0.00845051	1.1759
GO:0034329	cell junction assembly	biological_process	0.0009772	0.00845649	1.15925
GO:0046889	positive regulation of lipid biosynthetic process	biological_process	0.000993211	0.00858942	1.16672
GO:0006810	transport	biological_process	0.0010041	0.00867795	1.0725
GO:0019516	lactate oxidation	biological_process	0.00101358	0.00872566	1.28783
GO:0030262	apoptotic nuclear changes	biological_process	0.00101358	0.00872566	1.28783
GO:0032025	response to cobalt ion	biological_process	0.00101358	0.00872566	1.28783
GO:0051990	(R)-2-hydroxyglutarate dehydrogenase activity	molecular_function	0.00101358	0.00872566	1.28783
GO:0071287	cellular response to manganese ion	biological_process	0.00101358	0.00872566	1.28783
GO:0090150	establishment of protein localization to membrane	biological_process	0.00101358	0.00872566	1.28783
GO:0006869	lipid transport	biological_process	0.00105291	0.00905833	1.12886
GO:0014068	positive regulation of phosphatidylinositol 3-kinase signaling	biological_process	0.00108892	0.00928217	1.1409
GO:0002159	desmosome assembly	biological_process	0.00110209	0.00928217	1.32808
GO:0004630	phospholipase D activity	molecular_function	0.00110209	0.00928217	1.32808
GO:0005979	regulation of glycogen biosynthetic process	biological_process	0.00110209	0.00928217	1.32808
GO:0010631	epithelial cell migration	biological_process	0.00110209	0.00928217	1.32808
GO:0015254	glycerol channel activity	molecular_function	0.00110209	0.00928217	1.32808
GO:0019966	interleukin-1 binding	molecular_function	0.00110209	0.00928217	1.32808
GO:0021884	forebrain neuron development	biological_process	0.00110209	0.00928217	1.32808
GO:0022849	glutamate-gated calcium ion channel activity	molecular_function	0.00110209	0.00928217	1.32808
GO:0030579	ubiquitin-dependent SMAD protein catabolic process	biological_process	0.00110209	0.00928217	1.32808
GO:0031507	heterochromatin assembly	biological_process	0.00110209	0.00928217	1.32808
GO:0032089	NACHT domain binding	molecular_function	0.00110209	0.00928217	1.32808
GO:0034485	phosphatidylinositol-3,4,5-trisphosphate 5-phosphatase activity	molecular_function	0.00110209	0.00928217	1.32808
GO:0035063	nuclear speck organization	biological_process	0.00110209	0.00928217	1.32808
GO:0036336	dendritic cell migration	biological_process	0.00110209	0.00928217	1.32808
GO:0038036	sphingosine-1-phosphate receptor activity	molecular_function	0.00110209	0.00928217	1.32808
GO:0038060	nitric oxide-cGMP-mediated signaling pathway	biological_process	0.00110209	0.00928217	1.32808
GO:0038085	vascular endothelial growth factor binding	molecular_function	0.00110209	0.00928217	1.32808
GO:0042612	MHC class I protein complex	cellular_component	0.00110209	0.00928217	1.32808
GO:0046915	transition metal ion transmembrane transporter activity	molecular_function	0.00110209	0.00928217	1.32808
GO:0048787	presynaptic active zone membrane	cellular_component	0.00110209	0.00928217	1.32808
GO:0050760	negative regulation of thymidylate synthase biosynthetic process	biological_process	0.00110209	0.00928217	1.32808
GO:0055069	zinc ion homeostasis	biological_process	0.00110209	0.00928217	1.32808
GO:0060272	embryonic skeletal joint morphogenesis	biological_process	0.00110209	0.00928217	1.32808
GO:0070110	ciliary neurotrophic factor receptor complex	cellular_component	0.00110209	0.00928217	1.32808
GO:0070120	ciliary neurotrophic factor-mediated signaling pathway	biological_process	0.00110209	0.00928217	1.32808
GO:0071280	cellular response to copper ion	biological_process	0.00110209	0.00928217	1.32808
GO:0071907	determination of digestive tract left/right asymmetry	biological_process	0.00110209	0.00928217	1.32808
GO:0072572	poly-ADP-D-ribose binding	molecular_function	0.00110209	0.00928217	1.32808
GO:0098887	neurotransmitter receptor transport, endosome to postsynaptic membrane	biological_process	0.00110209	0.00928217	1.32808
GO:1901522	positive regulation of transcription from RNA polymerase II promoter involved in cellular response to chemical stimulus	biological_process	0.00110209	0.00928217	1.32808
GO:1990584	cardiac Troponin complex	cellular_component	0.00110209	0.00928217	1.32808
GO:2001034	positive regulation of double-strand break repair via nonhomologous end joining	biological_process	0.00110209	0.00928217	1.32808
GO:0033173	calcineurin-NFAT signaling cascade	biological_process	0.00112161	0.00943447	1.2174
GO:1900246	positive regulation of RIG-I signaling pathway	biological_process	0.00112161	0.00943447	1.2174
GO:0035871	protein K11-linked deubiquitination	biological_process	0.00113758	0.0095628	1.2433
GO:0007274	neuromuscular synaptic transmission	biological_process	0.00114036	0.00957395	1.15781
GO:0035025	positive regulation of Rho protein signal transduction	biological_process	0.00114036	0.00957395	1.15781
GO:0009299	mRNA transcription	biological_process	0.00115309	0.00965634	1.26167
GO:0035640	exploration behavior	biological_process	0.00115309	0.00965634	1.26167
GO:0045198	establishment of epithelial cell apical/basal polarity	biological_process	0.00115309	0.00965634	1.26167
GO:0050764	regulation of phagocytosis	biological_process	0.00115309	0.00965634	1.26167
GO:0043278	response to morphine	biological_process	0.00115648	0.00967244	1.20734
GO:0060072	large conductance calcium-activated potassium channel activity	molecular_function	0.00115648	0.00967244	1.20734
GO:0014704	intercalated disc	cellular_component	0.00118031	0.0098655	1.09466
GO:0008514	organic anion transmembrane transporter activity	molecular_function	0.00123218	0.0102926	1.17885
GO:1902017	regulation of cilium assembly	biological_process	0.00127895	0.0106765	1.13711
GO:0003139	secondary heart field specification	biological_process	0.0012889	0.010746	1.22784
GO:2001234	negative regulation of apoptotic signaling pathway	biological_process	0.0012889	0.010746	1.22784
GO:0010369	chromocenter	cellular_component	0.00130193	0.010841	1.18407
GO:0032469	endoplasmic reticulum calcium ion homeostasis	biological_process	0.00130193	0.010841	1.18407
GO:0004767	sphingomyelin phosphodiesterase activity	molecular_function	0.00130891	0.0108444	1.28657
GO:0010332	response to gamma radiation	biological_process	0.00130891	0.0108444	1.28657
GO:0030119	AP-type membrane coat adaptor complex	cellular_component	0.00130891	0.0108444	1.28657
GO:0032825	positive regulation of natural killer cell differentiation	biological_process	0.00130891	0.0108444	1.28657
GO:0050910	detection of mechanical stimulus involved in sensory perception of sound	biological_process	0.00130891	0.0108444	1.28657
GO:0055078	sodium ion homeostasis	biological_process	0.00130891	0.0108444	1.28657
GO:0061029	eyelid development in camera-type eye	biological_process	0.00130891	0.0108444	1.28657
GO:2001181	positive regulation of interleukin-10 secretion	biological_process	0.00130891	0.0108444	1.28657
GO:0006950	response to stress	biological_process	0.00136367	0.011291	1.12487
GO:0030165	PDZ domain binding	molecular_function	0.00136716	0.0113129	1.06959
GO:0001527	microfibril	cellular_component	0.00137342	0.0113505	1.21553
GO:0032584	growth cone membrane	cellular_component	0.00137342	0.0113505	1.21553
GO:0016281	eukaryotic translation initiation factor 4F complex	cellular_component	0.00139628	0.0115106	1.19714
GO:0040014	regulation of multicellular organism growth	biological_process	0.00139628	0.0115106	1.19714
GO:0050718	positive regulation of interleukin-1 beta secretion	biological_process	0.00139628	0.0115106	1.19714
GO:2000778	positive regulation of interleukin-6 secretion	biological_process	0.00139628	0.0115106	1.19714
GO:0030291	protein serine/threonine kinase inhibitor activity	molecular_function	0.00140483	0.0115739	1.20548
GO:0070201	regulation of establishment of protein localization	biological_process	0.00142138	0.0116957	1.24146
GO:1904294	positive regulation of ERAD pathway	biological_process	0.00142138	0.0116957	1.24146
GO:0031435	mitogen-activated protein kinase kinase kinase binding	molecular_function	0.00146089	0.0118166	1.25997
GO:0035162	embryonic hemopoiesis	biological_process	0.00146089	0.0118166	1.25997
GO:0061685	diphthine methylesterase activity	molecular_function	0.00146089	0.0118166	1.25997
GO:0006783	heme biosynthetic process	biological_process	0.00146232	0.0118166	1.17716
GO:0030705	cytoskeleton-dependent intracellular transport	biological_process	0.00146232	0.0118166	1.17716
GO:0005534	galactose binding	molecular_function	0.00146379	0.0118166	1.32808
GO:0006682	galactosylceramide biosynthetic process	biological_process	0.00146379	0.0118166	1.32808
GO:0006771	riboflavin metabolic process	biological_process	0.00146379	0.0118166	1.32808
GO:0008324	cation transmembrane transporter activity	molecular_function	0.00146379	0.0118166	1.32808
GO:0009308	amine metabolic process	biological_process	0.00146379	0.0118166	1.32808
GO:0009313	oligosaccharide catabolic process	biological_process	0.00146379	0.0118166	1.32808
GO:0015793	glycerol transport	biological_process	0.00146379	0.0118166	1.32808
GO:0018812	3-hydroxyacyl-CoA dehydratase activity	molecular_function	0.00146379	0.0118166	1.32808
GO:0022843	voltage-gated cation channel activity	molecular_function	0.00146379	0.0118166	1.32808
GO:0030856	regulation of epithelial cell differentiation	biological_process	0.00146379	0.0118166	1.32808
GO:0031798	type 1 metabotropic glutamate receptor binding	molecular_function	0.00146379	0.0118166	1.32808
GO:0032972	regulation of muscle filament sliding speed	biological_process	0.00146379	0.0118166	1.32808
GO:0033157	regulation of intracellular protein transport	biological_process	0.00146379	0.0118166	1.32808
GO:0035330	regulation of hippo signaling	biological_process	0.00146379	0.0118166	1.32808
GO:0044065	regulation of respiratory system process	biological_process	0.00146379	0.0118166	1.32808
GO:0045131	pre-mRNA branch point binding	molecular_function	0.00146379	0.0118166	1.32808
GO:0046578	regulation of Ras protein signal transduction	biological_process	0.00146379	0.0118166	1.32808
GO:0060373	regulation of ventricular cardiac muscle cell membrane depolarization	biological_process	0.00146379	0.0118166	1.32808
GO:0061828	apical tubulobulbar complex	cellular_component	0.00146379	0.0118166	1.32808
GO:0061829	basal tubulobulbar complex	cellular_component	0.00146379	0.0118166	1.32808
GO:0098844	postsynaptic endocytic zone membrane	cellular_component	0.00146379	0.0118166	1.32808
GO:0098884	postsynaptic neurotransmitter receptor internalization	biological_process	0.00146379	0.0118166	1.32808
GO:1902231	positive regulation of intrinsic apoptotic signaling pathway in response to DNA damage	biological_process	0.00146379	0.0118166	1.32808
GO:1902410	mitotic cytokinetic process	biological_process	0.00146379	0.0118166	1.32808
GO:1903393	positive regulation of adherens junction organization	biological_process	0.00146379	0.0118166	1.32808
GO:2001180	negative regulation of interleukin-10 secretion	biological_process	0.00146379	0.0118166	1.32808
GO:0016310	phosphorylation	biological_process	0.00148945	0.0120091	1.1671
GO:1901016	regulation of potassium ion transmembrane transporter activity	biological_process	0.00148945	0.0120091	1.1671
GO:0001570	vasculogenesis	biological_process	0.0015289	0.0123197	1.11769
GO:0007528	neuromuscular junction development	biological_process	0.00154209	0.0124185	1.12056
GO:0022027	interkinetic nuclear migration	biological_process	0.00155191	0.0124899	1.18231
GO:0034220	ion transmembrane transport	biological_process	0.00155836	0.0125341	1.06174
GO:0060326	cell chemotaxis	biological_process	0.00156726	0.0125981	1.14254
GO:0043083	synaptic cleft	cellular_component	0.00159147	0.0127772	1.22592
GO:0090068	positive regulation of cell cycle process	biological_process	0.00159147	0.0127772	1.22592
GO:0009725	response to hormone	biological_process	0.00160345	0.0128577	1.16207
GO:0060134	prepulse inhibition	biological_process	0.00160345	0.0128577	1.16207
GO:0004864	protein phosphatase inhibitor activity	molecular_function	0.00160938	0.0128975	1.1397
GO:0016578	histone deubiquitination	biological_process	0.00162805	0.0130392	1.18828
GO:0015143	urate transmembrane transporter activity	molecular_function	0.00167955	0.013437	1.21359
GO:0002456	T cell mediated immunity	biological_process	0.00168889	0.013437	1.28523
GO:0010045	response to nickel cation	biological_process	0.00168889	0.013437	1.28523
GO:0016277	[myelin basic protein]-arginine N-methyltransferase activity	molecular_function	0.00168889	0.013437	1.28523
GO:0032053	ciliary basal body organization	biological_process	0.00168889	0.013437	1.28523
GO:0034969	histone arginine methylation	biological_process	0.00168889	0.013437	1.28523
GO:0036477	somatodendritic compartment	cellular_component	0.00168889	0.013437	1.28523
GO:0043583	ear development	biological_process	0.00168889	0.013437	1.28523
GO:0048512	circadian behavior	biological_process	0.00168889	0.013437	1.28523
GO:0048845	venous blood vessel morphogenesis	biological_process	0.00168889	0.013437	1.28523
GO:1902166	negative regulation of intrinsic apoptotic signaling pathway in response to DNA damage by p53 class mediator	biological_process	0.00168889	0.013437	1.28523
GO:0034356	NAD biosynthesis via nicotinamide riboside salvage pathway	biological_process	0.00170425	0.0135429	1.20357
GO:2000780	negative regulation of double-strand break repair	biological_process	0.00170425	0.0135429	1.20357
GO:0045930	negative regulation of mitotic cell cycle	biological_process	0.00170707	0.0135571	1.1575
GO:0046658	anchored component of plasma membrane	cellular_component	0.00173328	0.013757	1.17542
GO:0045071	negative regulation of viral genome replication	biological_process	0.00174625	0.0138516	1.12434
GO:0019674	NAD metabolic process	biological_process	0.00175055	0.0138774	1.16545
GO:0006906	vesicle fusion	biological_process	0.00176147	0.0139556	1.08628
GO:0000137	Golgi cis cisterna	cellular_component	0.00177375	0.0140026	1.23954
GO:0002042	cell migration involved in sprouting angiogenesis	biological_process	0.00177375	0.0140026	1.23954
GO:0010739	positive regulation of protein kinase A signaling	biological_process	0.00177375	0.0140026	1.23954
GO:0030628	pre-mRNA 3'-splice site binding	molecular_function	0.00177375	0.0140026	1.23954
GO:0032184	SUMO polymer binding	molecular_function	0.00177375	0.0140026	1.23954
GO:2000178	negative regulation of neural precursor cell proliferation	biological_process	0.00177375	0.0140026	1.23954
GO:0008219	cell death	biological_process	0.0018034	0.0142281	1.14116
GO:0007219	Notch signaling pathway	biological_process	0.00181031	0.0142742	1.08834
GO:0061036	positive regulation of cartilage development	biological_process	0.0018475	0.0145253	1.18051
GO:0006826	iron ion transport	biological_process	0.00184875	0.0145253	1.25818
GO:0016460	myosin II complex	cellular_component	0.00184875	0.0145253	1.25818
GO:0050882	voluntary musculoskeletal movement	biological_process	0.00184875	0.0145253	1.25818
GO:0060038	cardiac muscle cell proliferation	biological_process	0.00184875	0.0145253	1.25818
GO:1901098	positive regulation of autophagosome maturation	biological_process	0.00184875	0.0145253	1.25818
GO:0034446	substrate adhesion-dependent cell spreading	biological_process	0.00188396	0.0147843	1.13573
GO:0046326	positive regulation of glucose import	biological_process	0.00188396	0.0147843	1.13573
GO:0001191	transcriptional repressor activity, RNA polymerase II transcription factor binding	molecular_function	0.00190129	0.0149026	1.16928
GO:0033365	protein localization to organelle	biological_process	0.00190129	0.0149026	1.16928
GO:0000836	Hrd1p ubiquitin ligase complex	cellular_component	0.00194418	0.0149813	1.32808
GO:0001709	cell fate determination	biological_process	0.00194418	0.0149813	1.32808
GO:0002385	mucosal immune response	biological_process	0.00194418	0.0149813	1.32808
GO:0003056	regulation of vascular smooth muscle contraction	biological_process	0.00194418	0.0149813	1.32808
GO:0003309	type B pancreatic cell differentiation	biological_process	0.00194418	0.0149813	1.32808
GO:0004565	beta-galactosidase activity	molecular_function	0.00194418	0.0149813	1.32808
GO:0004965	G-protein coupled GABA receptor activity	molecular_function	0.00194418	0.0149813	1.32808
GO:0005610	laminin-5 complex	cellular_component	0.00194418	0.0149813	1.32808
GO:0010518	positive regulation of phospholipase activity	biological_process	0.00194418	0.0149813	1.32808
GO:0010831	positive regulation of myotube differentiation	biological_process	0.00194418	0.0149813	1.32808
GO:0016176	superoxide-generating NADPH oxidase activator activity	molecular_function	0.00194418	0.0149813	1.32808
GO:0021775	smoothened signaling pathway involved in ventral spinal cord interneuron specification	biological_process	0.00194418	0.0149813	1.32808
GO:0021776	smoothened signaling pathway involved in spinal cord motor neuron cell fate specification	biological_process	0.00194418	0.0149813	1.32808
GO:0021853	cerebral cortex GABAergic interneuron migration	biological_process	0.00194418	0.0149813	1.32808
GO:0023052	signaling	biological_process	0.00194418	0.0149813	1.32808
GO:0030109	HLA-B specific inhibitory MHC class I receptor activity	molecular_function	0.00194418	0.0149813	1.32808
GO:0045163	clustering of voltage-gated potassium channels	biological_process	0.00194418	0.0149813	1.32808
GO:0051303	establishment of chromosome localization	biological_process	0.00194418	0.0149813	1.32808
GO:0071499	cellular response to laminar fluid shear stress	biological_process	0.00194418	0.0149813	1.32808
GO:0071557	histone H3-K27 demethylation	biological_process	0.00194418	0.0149813	1.32808
GO:0071797	LUBAC complex	cellular_component	0.00194418	0.0149813	1.32808
GO:0072542	protein phosphatase activator activity	molecular_function	0.00194418	0.0149813	1.32808
GO:0098792	xenophagy	biological_process	0.00194418	0.0149813	1.32808
GO:0110024	positive regulation of cardiac muscle myoblast proliferation	biological_process	0.00194418	0.0149813	1.32808
GO:1904492	Ac-Asp-Glu binding	molecular_function	0.00194418	0.0149813	1.32808
GO:1904493	tetrahydrofolyl-poly(glutamate) polymer binding	molecular_function	0.00194418	0.0149813	1.32808
GO:1990071	TRAPPII protein complex	cellular_component	0.00194418	0.0149813	1.32808
GO:2000670	positive regulation of dendritic cell apoptotic process	biological_process	0.00194418	0.0149813	1.32808
GO:2001189	negative regulation of T cell activation via T cell receptor contact with antigen bound to MHC molecule on antigen presenting cell	biological_process	0.00194418	0.0149813	1.32808
GO:0000338	protein deneddylation	biological_process	0.00194783	0.014992	1.18641
GO:0032688	negative regulation of interferon-beta production	biological_process	0.00194783	0.014992	1.18641
GO:0043531	ADP binding	molecular_function	0.00195586	0.015045	1.146
GO:0051294	establishment of spindle orientation	biological_process	0.00196243	0.015078	1.22391
GO:2000505	regulation of energy homeostasis	biological_process	0.00196243	0.015078	1.22391
GO:0005789	endoplasmic reticulum membrane	cellular_component	0.00196966	0.0151247	1.02604
GO:0032012	regulation of ARF protein signal transduction	biological_process	0.0019902	0.0152736	1.15592
GO:0007194	negative regulation of adenylate cyclase activity	biological_process	0.00202457	0.0155104	1.19334
GO:0008028	monocarboxylic acid transmembrane transporter activity	molecular_function	0.00202457	0.0155104	1.19334
GO:0050884	neuromuscular process controlling posture	biological_process	0.00202457	0.0155104	1.19334
GO:0008307	structural constituent of muscle	molecular_function	0.00202676	0.0155182	1.09476
GO:0005247	voltage-gated chloride channel activity	molecular_function	0.0020511	0.0156864	1.21158
GO:0090286	cytoskeletal anchoring at nuclear membrane	biological_process	0.0020511	0.0156864	1.21158
GO:0036503	ERAD pathway	biological_process	0.00206468	0.0157719	1.20159
GO:0044387	negative regulation of protein kinase activity by regulation of protein phosphorylation	biological_process	0.00206468	0.0157719	1.20159
GO:0030100	regulation of endocytosis	biological_process	0.00207292	0.0158257	1.13977
GO:0034063	stress granule assembly	biological_process	0.0020914	0.0159576	1.15178
GO:0090314	positive regulation of protein targeting to membrane	biological_process	0.00212659	0.0162168	1.11202
GO:0070830	bicellular tight junction assembly	biological_process	0.00215525	0.0164259	1.1344
GO:0001940	male pronucleus	cellular_component	0.00217731	0.0164989	1.28381
GO:0003402	planar cell polarity pathway involved in axis elongation	biological_process	0.00217731	0.0164989	1.28381
GO:0004366	glycerol-3-phosphate O-acyltransferase activity	molecular_function	0.00217731	0.0164989	1.28381
GO:0006012	galactose metabolic process	biological_process	0.00217731	0.0164989	1.28381
GO:0042993	positive regulation of transcription factor import into nucleus	biological_process	0.00217731	0.0164989	1.28381
GO:0043117	positive regulation of vascular permeability	biological_process	0.00217731	0.0164989	1.28381
GO:0048484	enteric nervous system development	biological_process	0.00217731	0.0164989	1.28381
GO:0086073	bundle of His cell-Purkinje myocyte adhesion involved in cell communication	biological_process	0.00217731	0.0164989	1.28381
GO:0102420	sn-1-glycerol-3-phosphate C16:0-DCA-CoA acyl transferase activity	molecular_function	0.00217731	0.0164989	1.28381
GO:2000553	positive regulation of T-helper 2 cell cytokine production	biological_process	0.00217731	0.0164989	1.28381
GO:0001944	vasculature development	biological_process	0.00221056	0.0167317	1.23752
GO:1900028	negative regulation of ruffle assembly	biological_process	0.00221056	0.0167317	1.23752
GO:0030127	COPII vesicle coat	cellular_component	0.00232728	0.0176051	1.1845
GO:0032926	negative regulation of activin receptor signaling pathway	biological_process	0.00233679	0.0176467	1.25629
GO:0035973	aggrephagy	biological_process	0.00233679	0.0176467	1.25629
GO:0045179	apical cortex	cellular_component	0.00233679	0.0176467	1.25629
GO:0043231	intracellular membrane-bounded organelle	cellular_component	0.00239456	0.0180726	1.0283
GO:0010389	regulation of G2/M transition of mitotic cell cycle	biological_process	0.00240501	0.0181411	1.06372
GO:0007525	somatic muscle development	biological_process	0.00241651	0.0181864	1.22183
GO:0031616	spindle pole centrosome	cellular_component	0.00241651	0.0181864	1.22183
GO:0034498	early endosome to Golgi transport	biological_process	0.00241651	0.0181864	1.22183
GO:0097454	Schwann cell microvillus	cellular_component	0.00241651	0.0181864	1.22183
GO:0043085	positive regulation of catalytic activity	biological_process	0.00242681	0.0182536	1.15021
GO:0005765	lysosomal membrane	cellular_component	0.00243932	0.0183372	1.04636
GO:0035371	microtubule plus-end	cellular_component	0.00249143	0.0187183	1.13066
GO:1901315	negative regulation of histone H2A K63-linked ubiquitination	biological_process	0.00249782	0.0187394	1.19955
GO:1904380	endoplasmic reticulum mannose trimming	biological_process	0.00249782	0.0187394	1.19955
GO:0000813	ESCRT I complex	cellular_component	0.00250133	0.0187394	1.2095
GO:0010288	response to lead ion	biological_process	0.00250133	0.0187394	1.2095
GO:0090023	positive regulation of neutrophil chemotaxis	biological_process	0.00250133	0.0187394	1.2095
GO:0003151	outflow tract morphogenesis	biological_process	0.00251834	0.0187607	1.11916
GO:2000145	regulation of cell motility	biological_process	0.0025611	0.0187607	1.15713
GO:1904115	axon cytoplasm	cellular_component	0.00256724	0.0187607	1.10133
GO:0000155	phosphorelay sensor kinase activity	molecular_function	0.00258221	0.0187607	1.32808
GO:0002051	osteoblast fate commitment	biological_process	0.00258221	0.0187607	1.32808
GO:0002740	negative regulation of cytokine secretion involved in immune response	biological_process	0.00258221	0.0187607	1.32808
GO:0003917	DNA topoisomerase type I activity	molecular_function	0.00258221	0.0187607	1.32808
GO:0004335	galactokinase activity	molecular_function	0.00258221	0.0187607	1.32808
GO:0009994	oocyte differentiation	biological_process	0.00258221	0.0187607	1.32808
GO:0015299	solute:proton antiporter activity	molecular_function	0.00258221	0.0187607	1.32808
GO:0016064	immunoglobulin mediated immune response	biological_process	0.00258221	0.0187607	1.32808
GO:0030061	mitochondrial crista	cellular_component	0.00258221	0.0187607	1.32808
GO:0030107	HLA-A specific inhibitory MHC class I receptor activity	molecular_function	0.00258221	0.0187607	1.32808
GO:0030160	GKAP/Homer scaffold activity	molecular_function	0.00258221	0.0187607	1.32808
GO:0031579	membrane raft organization	biological_process	0.00258221	0.0187607	1.32808
GO:0031999	negative regulation of fatty acid beta-oxidation	biological_process	0.00258221	0.0187607	1.32808
GO:0032945	negative regulation of mononuclear cell proliferation	biological_process	0.00258221	0.0187607	1.32808
GO:0033858	N-acetylgalactosamine kinase activity	molecular_function	0.00258221	0.0187607	1.32808
GO:0035414	negative regulation of catenin import into nucleus	biological_process	0.00258221	0.0187607	1.32808
GO:0035548	negative regulation of interferon-beta secretion	biological_process	0.00258221	0.0187607	1.32808
GO:0036091	positive regulation of transcription from RNA polymerase II promoter in response to oxidative stress	biological_process	0.00258221	0.0187607	1.32808
GO:0036449	microtubule minus-end	cellular_component	0.00258221	0.0187607	1.32808
GO:0038063	collagen-activated tyrosine kinase receptor signaling pathway	biological_process	0.00258221	0.0187607	1.32808
GO:0038066	p38MAPK cascade	biological_process	0.00258221	0.0187607	1.32808
GO:0043434	response to peptide hormone	biological_process	0.00258221	0.0187607	1.32808
GO:0043550	regulation of lipid kinase activity	biological_process	0.00258221	0.0187607	1.32808
GO:0045077	negative regulation of interferon-gamma biosynthetic process	biological_process	0.00258221	0.0187607	1.32808
GO:0045324	late endosome to vacuole transport	biological_process	0.00258221	0.0187607	1.32808
GO:0045822	negative regulation of heart contraction	biological_process	0.00258221	0.0187607	1.32808
GO:0046425	regulation of JAK-STAT cascade	biological_process	0.00258221	0.0187607	1.32808
GO:0048368	lateral mesoderm development	biological_process	0.00258221	0.0187607	1.32808
GO:0051057	positive regulation of small GTPase mediated signal transduction	biological_process	0.00258221	0.0187607	1.32808
GO:0051101	regulation of DNA binding	biological_process	0.00258221	0.0187607	1.32808
GO:0051282	regulation of sequestering of calcium ion	biological_process	0.00258221	0.0187607	1.32808
GO:0060563	neuroepithelial cell differentiation	biological_process	0.00258221	0.0187607	1.32808
GO:0060596	mammary placode formation	biological_process	0.00258221	0.0187607	1.32808
GO:0061845	neuron projection branch point	cellular_component	0.00258221	0.0187607	1.32808
GO:0061846	dendritic spine cytoplasm	cellular_component	0.00258221	0.0187607	1.32808
GO:0070290	N-acylphosphatidylethanolamine-specific phospholipase D activity	molecular_function	0.00258221	0.0187607	1.32808
GO:0070436	Grb2-EGFR complex	cellular_component	0.00258221	0.0187607	1.32808
GO:0070699	type II activin receptor binding	molecular_function	0.00258221	0.0187607	1.32808
GO:0071477	cellular hypotonic salinity response	biological_process	0.00258221	0.0187607	1.32808
GO:0071888	macrophage apoptotic process	biological_process	0.00258221	0.0187607	1.32808
GO:0072429	response to intra-S DNA damage checkpoint signaling	biological_process	0.00258221	0.0187607	1.32808
GO:0097111	endoplasmic reticulum-Golgi intermediate compartment organization	biological_process	0.00258221	0.0187607	1.32808
GO:0097274	urea homeostasis	biological_process	0.00258221	0.0187607	1.32808
GO:0097500	receptor localization to non-motile cilium	biological_process	0.00258221	0.0187607	1.32808
GO:0097513	myosin II filament	cellular_component	0.00258221	0.0187607	1.32808
GO:1904707	positive regulation of vascular smooth muscle cell proliferation	biological_process	0.00258221	0.0187607	1.32808
GO:1904714	regulation of chaperone-mediated autophagy	biological_process	0.00258221	0.0187607	1.32808
GO:1990927	calcium ion regulated lysosome exocytosis	biological_process	0.00258221	0.0187607	1.32808
GO:2000669	negative regulation of dendritic cell apoptotic process	biological_process	0.00258221	0.0187607	1.32808
GO:2001186	negative regulation of CD8-positive, alpha-beta T cell activation	biological_process	0.00258221	0.0187607	1.32808
GO:2001193	positive regulation of gamma-delta T cell activation involved in immune response	biological_process	0.00258221	0.0187607	1.32808
GO:2001202	negative regulation of transforming growth factor-beta secretion	biological_process	0.00258221	0.0187607	1.32808
GO:0030007	cellular potassium ion homeostasis	biological_process	0.00260792	0.0189371	1.17678
GO:0005938	cell cortex	cellular_component	0.00263249	0.0191051	1.05787
GO:0048678	response to axon injury	biological_process	0.00263403	0.0191057	1.16575
GO:0019902	phosphatase binding	molecular_function	0.00270691	0.0196236	1.09238
GO:0017112	Rab guanyl-nucleotide exchange factor activity	molecular_function	0.00271794	0.0196928	1.0769
GO:0080025	phosphatidylinositol-3,5-bisphosphate binding	molecular_function	0.00273595	0.0198124	1.11235
GO:0035767	endothelial cell chemotaxis	biological_process	0.00275119	0.0198901	1.23542
GO:0060081	membrane hyperpolarization	biological_process	0.00275119	0.0198901	1.23542
GO:1901525	negative regulation of mitophagy	biological_process	0.00275119	0.0198901	1.23542
GO:0017183	peptidyl-diphthamide biosynthetic process from peptidyl-histidine	biological_process	0.00277681	0.0200643	1.18253
GO:0001955	blood vessel maturation	biological_process	0.00280439	0.0200989	1.28228
GO:0009922	fatty acid elongase activity	molecular_function	0.00280439	0.0200989	1.28228
GO:0010841	positive regulation of circadian sleep/wake cycle, wakefulness	biological_process	0.00280439	0.0200989	1.28228
GO:0019367	fatty acid elongation, saturated fatty acid	biological_process	0.00280439	0.0200989	1.28228
GO:0021516	dorsal spinal cord development	biological_process	0.00280439	0.0200989	1.28228
GO:0034625	fatty acid elongation, monounsaturated fatty acid	biological_process	0.00280439	0.0200989	1.28228
GO:0034626	fatty acid elongation, polyunsaturated fatty acid	biological_process	0.00280439	0.0200989	1.28228
GO:0050915	sensory perception of sour taste	biological_process	0.00280439	0.0200989	1.28228
GO:0051438	regulation of ubiquitin-protein transferase activity	biological_process	0.00280439	0.0200989	1.28228
GO:0060441	epithelial tube branching involved in lung morphogenesis	biological_process	0.00280439	0.0200989	1.28228
GO:0102336	3-oxo-arachidoyl-CoA synthase activity	molecular_function	0.00280439	0.0200989	1.28228
GO:0102337	3-oxo-cerotoyl-CoA synthase activity	molecular_function	0.00280439	0.0200989	1.28228
GO:0102338	3-oxo-lignoceronyl-CoA synthase activity	molecular_function	0.00280439	0.0200989	1.28228
GO:0102756	very-long-chain 3-ketoacyl-CoA synthase activity	molecular_function	0.00280439	0.0200989	1.28228
GO:2000667	positive regulation of interleukin-13 secretion	biological_process	0.00280439	0.0200989	1.28228
GO:0051893	regulation of focal adhesion assembly	biological_process	0.00286833	0.020546	1.12313
GO:0008544	epidermis development	biological_process	0.00291009	0.0208338	1.1012
GO:0097718	disordered domain specific binding	molecular_function	0.00291939	0.0208891	1.18932
GO:0046966	thyroid hormone receptor binding	molecular_function	0.00293271	0.0209731	1.10778
GO:0005328	neurotransmitter:sodium symporter activity	molecular_function	0.00294996	0.0210169	1.25429
GO:0009642	response to light intensity	biological_process	0.00294996	0.0210169	1.25429
GO:0055089	fatty acid homeostasis	biological_process	0.00294996	0.0210169	1.25429
GO:0061000	negative regulation of dendritic spine development	biological_process	0.00294996	0.0210169	1.25429
GO:0071542	dopaminergic neuron differentiation	biological_process	0.00294996	0.0210169	1.25429
GO:0072345	NAADP-sensitive calcium-release channel activity	molecular_function	0.00294996	0.0210169	1.25429
GO:2000987	positive regulation of behavioral fear response	biological_process	0.00294996	0.0210169	1.25429
GO:0016591	DNA-directed RNA polymerase II, holoenzyme	cellular_component	0.00297137	0.0211466	1.21966
GO:0018216	peptidyl-arginine methylation	biological_process	0.00297137	0.0211466	1.21966
GO:0070821	tertiary granule membrane	cellular_component	0.00301628	0.0214547	1.08736
GO:0005041	low-density lipoprotein receptor activity	molecular_function	0.00304593	0.0216191	1.20734
GO:0015187	glycine transmembrane transporter activity	molecular_function	0.00304593	0.0216191	1.20734
GO:0030203	glycosaminoglycan metabolic process	biological_process	0.00304593	0.0216191	1.20734
GO:0030296	protein tyrosine kinase activator activity	molecular_function	0.00304593	0.0216191	1.20734
GO:0042552	myelination	biological_process	0.0030658	0.0217484	1.11125
GO:0071361	cellular response to ethanol	biological_process	0.00309213	0.0219235	1.17484
GO:0016327	apicolateral plasma membrane	cellular_component	0.0031311	0.0221878	1.151
GO:0005769	early endosome	cellular_component	0.003135	0.0222036	1.04665
GO:0000187	activation of MAPK activity	biological_process	0.00319429	0.0226114	1.08446
GO:0051225	spindle assembly	biological_process	0.00319828	0.0226275	1.11679
GO:0005791	rough endoplasmic reticulum	cellular_component	0.00322012	0.0227699	1.11838
GO:0071300	cellular response to retinoic acid	biological_process	0.00323629	0.022872	1.12006
GO:0005227	calcium activated cation channel activity	molecular_function	0.00329867	0.0232817	1.15853
GO:0050732	negative regulation of peptidyl-tyrosine phosphorylation	biological_process	0.00329867	0.0232817	1.15853
GO:0048306	calcium-dependent protein binding	molecular_function	0.00329955	0.0232817	1.10105
GO:0051291	protein heterooligomerization	biological_process	0.00331106	0.0233505	1.08041
GO:1990380	Lys48-specific deubiquitinase activity	molecular_function	0.00336201	0.023473	1.1433
GO:0047496	vesicle transport along microtubule	biological_process	0.00337673	0.023473	1.16807
GO:0015816	glycine transport	biological_process	0.00341915	0.023473	1.23321
GO:0070286	axonemal dynein complex assembly	biological_process	0.00341915	0.023473	1.23321
GO:0000126	transcription factor TFIIIB complex	cellular_component	0.00342962	0.023473	1.32808
GO:0001026	TFIIIB-type transcription factor activity	molecular_function	0.00342962	0.023473	1.32808
GO:0001129	RNA polymerase II transcription factor activity, TBP-class protein binding, involved in preinitiation complex assembly	molecular_function	0.00342962	0.023473	1.32808
GO:0003323	type B pancreatic cell development	biological_process	0.00342962	0.023473	1.32808
GO:0003431	growth plate cartilage chondrocyte development	biological_process	0.00342962	0.023473	1.32808
GO:0003858	3-hydroxybutyrate dehydrogenase activity	molecular_function	0.00342962	0.023473	1.32808
GO:0004372	glycine hydroxymethyltransferase activity	molecular_function	0.00342962	0.023473	1.32808
GO:0005000	vasopressin receptor activity	molecular_function	0.00342962	0.023473	1.32808
GO:0005250	A-type (transient outward) potassium channel activity	molecular_function	0.00342962	0.023473	1.32808
GO:0007529	establishment of synaptic specificity at neuromuscular junction	biological_process	0.00342962	0.023473	1.32808
GO:0008732	L-allo-threonine aldolase activity	molecular_function	0.00342962	0.023473	1.32808
GO:0008940	nitrate reductase activity	molecular_function	0.00342962	0.023473	1.32808
GO:0010594	regulation of endothelial cell migration	biological_process	0.00342962	0.023473	1.32808
GO:0016015	morphogen activity	molecular_function	0.00342962	0.023473	1.32808
GO:0018094	protein polyglycylation	biological_process	0.00342962	0.023473	1.32808
GO:0018315	molybdenum incorporation into molybdenum-molybdopterin complex	biological_process	0.00342962	0.023473	1.32808
GO:0019210	kinase inhibitor activity	molecular_function	0.00342962	0.023473	1.32808
GO:0019262	N-acetylneuraminate catabolic process	biological_process	0.00342962	0.023473	1.32808
GO:0019264	glycine biosynthetic process from serine	biological_process	0.00342962	0.023473	1.32808
GO:0030219	megakaryocyte differentiation	biological_process	0.00342962	0.023473	1.32808
GO:0030546	receptor activator activity	molecular_function	0.00342962	0.023473	1.32808
GO:0031227	intrinsic component of endoplasmic reticulum membrane	cellular_component	0.00342962	0.023473	1.32808
GO:0031622	positive regulation of fever generation	biological_process	0.00342962	0.023473	1.32808
GO:0032472	Golgi calcium ion transport	biological_process	0.00342962	0.023473	1.32808
GO:0033058	directional locomotion	biological_process	0.00342962	0.023473	1.32808
GO:0034243	regulation of transcription elongation from RNA polymerase II promoter	biological_process	0.00342962	0.023473	1.32808
GO:0035095	behavioral response to nicotine	biological_process	0.00342962	0.023473	1.32808
GO:0042730	fibrinolysis	biological_process	0.00342962	0.023473	1.32808
GO:0043262	adenosine-diphosphatase activity	molecular_function	0.00342962	0.023473	1.32808
GO:0043734	DNA-N1-methyladenine dioxygenase activity	molecular_function	0.00342962	0.023473	1.32808
GO:0045075	regulation of interleukin-12 biosynthetic process	biological_process	0.00342962	0.023473	1.32808
GO:0045959	negative regulation of complement activation, classical pathway	biological_process	0.00342962	0.023473	1.32808
GO:0050220	prostaglandin-E synthase activity	molecular_function	0.00342962	0.023473	1.32808
GO:0060313	negative regulation of blood vessel remodeling	biological_process	0.00342962	0.023473	1.32808
GO:0061364	apoptotic process involved in luteolysis	biological_process	0.00342962	0.023473	1.32808
GO:0061598	molybdopterin adenylyltransferase activity	molecular_function	0.00342962	0.023473	1.32808
GO:0061599	molybdopterin molybdotransferase activity	molecular_function	0.00342962	0.023473	1.32808
GO:0070735	protein-glycine ligase activity	molecular_function	0.00342962	0.023473	1.32808
GO:0070989	oxidative demethylation	biological_process	0.00342962	0.023473	1.32808
GO:0071801	regulation of podosome assembly	biological_process	0.00342962	0.023473	1.32808
GO:0072579	glycine receptor clustering	biological_process	0.00342962	0.023473	1.32808
GO:0085032	modulation by symbiont of host I-kappaB kinase/NF-kappaB cascade	biological_process	0.00342962	0.023473	1.32808
GO:0086047	membrane depolarization during Purkinje myocyte cell action potential	biological_process	0.00342962	0.023473	1.32808
GO:0099572	postsynaptic specialization	cellular_component	0.00342962	0.023473	1.32808
GO:1902745	positive regulation of lamellipodium organization	biological_process	0.00342962	0.023473	1.32808
GO:1903409	reactive oxygen species biosynthetic process	biological_process	0.00342962	0.023473	1.32808
GO:1903818	positive regulation of voltage-gated potassium channel activity	biological_process	0.00342962	0.023473	1.32808
GO:1904117	cellular response to vasopressin	biological_process	0.00342962	0.023473	1.32808
GO:1904766	negative regulation of macroautophagy by TORC1 signaling	biological_process	0.00342962	0.023473	1.32808
GO:1905123	regulation of glucosylceramidase activity	biological_process	0.00342962	0.023473	1.32808
GO:1990604	IRE1-TRAF2-ASK1 complex	cellular_component	0.00342962	0.023473	1.32808
GO:1990715	mRNA CDS binding	molecular_function	0.00342962	0.023473	1.32808
GO:2001031	positive regulation of cellular glucuronidation	biological_process	0.00342962	0.023473	1.32808
GO:0001916	positive regulation of T cell mediated cytotoxicity	biological_process	0.0034778	0.0237905	1.15368
GO:0043536	positive regulation of blood vessel endothelial cell migration	biological_process	0.00349808	0.0239045	1.18722
GO:1902230	negative regulation of intrinsic apoptotic signaling pathway in response to DNA damage	biological_process	0.00349808	0.0239045	1.18722
GO:0006661	phosphatidylinositol biosynthetic process	biological_process	0.00355267	0.024265	1.06589
GO:0030375	thyroid hormone receptor coactivator activity	molecular_function	0.00360854	0.0245704	1.28064
GO:0030889	negative regulation of B cell proliferation	biological_process	0.00360854	0.0245704	1.28064
GO:0048745	smooth muscle tissue development	biological_process	0.00360854	0.0245704	1.28064
GO:0051045	negative regulation of membrane protein ectodomain proteolysis	biological_process	0.00360854	0.0245704	1.28064
GO:0065009	regulation of molecular function	biological_process	0.00360854	0.0245704	1.28064
GO:0071385	cellular response to glucocorticoid stimulus	biological_process	0.00360854	0.0245704	1.28064
GO:0010832	negative regulation of myotube differentiation	biological_process	0.00363976	0.0247702	1.19527
GO:1902533	positive regulation of intracellular signal transduction	biological_process	0.00364819	0.0248148	1.2174
GO:0017016	Ras GTPase binding	molecular_function	0.00366108	0.0248897	1.17285
GO:0030878	thyroid gland development	biological_process	0.00370353	0.0251525	1.20511
GO:0031045	dense core granule	cellular_component	0.00370353	0.0251525	1.20511
GO:0030512	negative regulation of transforming growth factor beta receptor signaling pathway	biological_process	0.00371493	0.0252065	1.10673
GO:0001893	maternal placenta development	biological_process	0.00371912	0.0252065	1.25219
GO:0007021	tubulin complex assembly	biological_process	0.00371912	0.0252065	1.25219
GO:1903546	protein localization to photoreceptor outer segment	biological_process	0.00371912	0.0252065	1.25219
GO:0051865	protein autoubiquitination	biological_process	0.00374212	0.0253494	1.1009
GO:0006024	glycosaminoglycan biosynthetic process	biological_process	0.00376447	0.0254877	1.14531
GO:0010977	negative regulation of neuron projection development	biological_process	0.00377321	0.0255338	1.09687
GO:0006644	phospholipid metabolic process	biological_process	0.00395158	0.0267272	1.11154
GO:0019955	cytokine binding	molecular_function	0.00397577	0.0268634	1.16611
GO:0048538	thymus development	biological_process	0.00397577	0.0268634	1.16611
GO:0031432	titin binding	molecular_function	0.00403695	0.0272628	1.13529
GO:0050770	regulation of axonogenesis	biological_process	0.0041315	0.0278871	1.12986
GO:0007265	Ras protein signal transduction	biological_process	0.00414288	0.0279497	1.10564
GO:0009790	embryo development	biological_process	0.00415061	0.0279875	1.0999
GO:0045668	negative regulation of osteoblast differentiation	biological_process	0.00415709	0.0280169	1.12743
GO:0005384	manganese ion transmembrane transporter activity	molecular_function	0.00424297	0.028523	1.2309
GO:0009303	rRNA transcription	biological_process	0.00424297	0.028523	1.2309
GO:0035235	ionotropic glutamate receptor signaling pathway	biological_process	0.00424297	0.028523	1.2309
GO:0046323	glucose import	biological_process	0.00424297	0.028523	1.2309
GO:0097322	7SK snRNA binding	molecular_function	0.00424297	0.028523	1.2309
GO:0016567	protein ubiquitination	biological_process	0.00430866	0.0289499	1.03705
GO:0060384	innervation	biological_process	0.00432846	0.0290682	1.1708
GO:0048386	positive regulation of retinoic acid receptor signaling pathway	biological_process	0.00438367	0.029424	1.19302
GO:0006337	nucleosome disassembly	biological_process	0.00447223	0.0299067	1.21505
GO:0000288	nuclear-transcribed mRNA catabolic process, deadenylation-dependent decay	biological_process	0.0044961	0.0299067	1.20279
GO:0030913	paranodal junction assembly	biological_process	0.0044961	0.0299067	1.20279
GO:0035810	positive regulation of urine volume	biological_process	0.0044961	0.0299067	1.20279
GO:0000989	transcription factor activity, transcription factor binding	molecular_function	0.00455511	0.0299067	1.32808
GO:0002030	inhibitory G-protein coupled receptor phosphorylation	biological_process	0.00455511	0.0299067	1.32808
GO:0002143	tRNA wobble position uridine thiolation	biological_process	0.00455511	0.0299067	1.32808
GO:0010609	mRNA localization resulting in posttranscriptional regulation of gene expression	biological_process	0.00455511	0.0299067	1.32808
GO:0015186	L-glutamine transmembrane transporter activity	molecular_function	0.00455511	0.0299067	1.32808
GO:0016004	phospholipase activator activity	molecular_function	0.00455511	0.0299067	1.32808
GO:0016309	1-phosphatidylinositol-5-phosphate 4-kinase activity	molecular_function	0.00455511	0.0299067	1.32808
GO:0016783	sulfurtransferase activity	molecular_function	0.00455511	0.0299067	1.32808
GO:0021681	cerebellar granular layer development	biological_process	0.00455511	0.0299067	1.32808
GO:0031094	platelet dense tubular network	cellular_component	0.00455511	0.0299067	1.32808
GO:0032222	regulation of synaptic transmission, cholinergic	biological_process	0.00455511	0.0299067	1.32808
GO:0032344	regulation of aldosterone metabolic process	biological_process	0.00455511	0.0299067	1.32808
GO:0032970	regulation of actin filament-based process	biological_process	0.00455511	0.0299067	1.32808
GO:0034115	negative regulation of heterotypic cell-cell adhesion	biological_process	0.00455511	0.0299067	1.32808
GO:0035067	negative regulation of histone acetylation	biological_process	0.00455511	0.0299067	1.32808
GO:0035544	negative regulation of SNARE complex assembly	biological_process	0.00455511	0.0299067	1.32808
GO:0036294	cellular response to decreased oxygen levels	biological_process	0.00455511	0.0299067	1.32808
GO:0040012	regulation of locomotion	biological_process	0.00455511	0.0299067	1.32808
GO:0043482	cellular pigment accumulation	biological_process	0.00455511	0.0299067	1.32808
GO:0045029	UDP-activated nucleotide receptor activity	molecular_function	0.00455511	0.0299067	1.32808
GO:0050429	calcium-dependent phospholipase C activity	molecular_function	0.00455511	0.0299067	1.32808
GO:0050878	regulation of body fluid levels	biological_process	0.00455511	0.0299067	1.32808
GO:0060082	eye blink reflex	biological_process	0.00455511	0.0299067	1.32808
GO:0060466	activation of meiosis involved in egg activation	biological_process	0.00455511	0.0299067	1.32808
[truncated: 1,579 more rows]
