# Supplementary material for: Sevoflurane-induced POCD-associated exosomes delivered miR-584-5p regulates the growth of human microglia HMC3 cells through targeting BDNF
Source: Aging (Albany NY). 2022 Nov 30;14(24):9890–907. doi: 10.18632/aging.204398 (PMC9831737; doi:10.18632/aging.204398)
Supplement: Supplementary Table 3 [file aging-14-204398-s003.xlsx]

## Sheet: KEGG
Supplementary Table 3. All kyoto encyclopedia of genes and genomes pathways enrichment of these DE-miRNAs with P value < 0.05.
id	Term	ListHits	ListTotal	PopHits	PopTotal	pValue	qValue	Enrichment_score	Gene
path:hsa04810	Regulation of actin cytoskeleton	1399	29768	1589	39356	9.36054e-37	3.04218e-34	1.16401	NM_000038.5(APC);NM_000141.4(FGFR2);NM_000142.4(FGFR3);NM_000177.4(GSN);NM_000207.2(INS);NM_000210.3(ITGA6);NM_000211.4(ITGB2);NM_000212.2(ITGB3);NM_000213.4(ITGB4);NM_000377.2(WAS);NM_000419.4(ITGA2B);NM_000432.3(MYL2);NM_000506.4(F2);NM_000609.6(CXCL12);NM_000623.3(BDKRB2);NM_000632.3(ITGAM);NM_000710.3(BDKRB1);NM_000738.2(CHRM1);NM_000739.2(CHRM2);NM_000740.3(CHRM3);NM_000741.3(CHRM4);NM_00080…
path:hsa04151	PI3K-Akt signaling pathway	1733	29768	2014	39356	1.99228e-32	3.23745e-30	1.13763	NM_000088.3(COL1A1);NM_000089.3(COL1A2);NM_000091.4(COL4A3);NM_000092.4(COL4A4);NM_000095.2(COMP);NM_000121.3(EPOR);NM_000141.4(FGFR2);NM_000142.4(FGFR3);NM_000151.3(G6PC);NM_000163.4(GHR);NM_000206.2(IL2RG);NM_000207.2(INS);NM_000208.3(INSR);NM_000210.3(ITGA6);NM_000212.2(ITGB3);NM_000213.4(ITGB4);NM_000215.3(JAK3);NM_000222.2(KIT);NM_000227.4(LAMA3);NM_000228.2(LAMB3);NM_000245.3(MET);NM_000314…
path:hsa04921	Oxytocin signaling pathway	996	29768	1125	39356	1.85952e-28	2.01448e-26	1.17049	NM_000069.2(CACNA1S);NM_000389.4(CDKN1A);NM_000516.5(GNAS);NM_000540.2(RYR1);NM_000603.4(NOS3);NM_000719.6(CACNA1C);NM_000720.3(CACNA1D);NM_000722.3(CACNA2D1);NM_000723.4(CACNB1);NM_000724.3(CACNB2);NM_000725.3(CACNB3);NM_000726.4(CACNB4);NM_000727.3(CACNG1);NM_000855.2(GUCY1A2);NM_000856.5(GUCY1A1);NM_000857.3(GUCY1B1);NM_000890.4(KCNJ5);NM_000891.2(KCNJ2);NM_000906.3(NPR1);NM_000915.3(OXT);NM_0…
path:hsa04015	Rap1 signaling pathway	1218	29768	1398	39356	1.07534e-27	8.73716e-26	1.15186	NM_000141.4(FGFR2);NM_000142.4(FGFR3);NM_000207.2(INS);NM_000208.3(INSR);NM_000211.4(ITGB2);NM_000212.2(ITGB3);NM_000222.2(KIT);NM_000245.3(MET);NM_000419.4(ITGA2B);NM_000516.5(GNAS);NM_000601.5(HGF);NM_000618.4(IGF1);NM_000632.3(ITGAM);NM_000675.5(ADORA2A);NM_000676.2(ADORA2B);NM_000757.5(CSF1);NM_000795.3(DRD2);NM_000800.4(FGF1);NM_000832.6(GRIN1);NM_000833.4(GRIN2A);NM_000834.4(GRIN2B);NM_0008…
path:hsa04520	Adherens junction	659	29768	728	39356	2.46215e-25	1.6004e-23	1.19678	NM_000208.3(INSR);NM_000245.3(MET);NM_000377.2(WAS);NM_000875.4(IGF1R);NM_001003652.3(SMAD2);NM_001005862.2(ERBB2);NM_001024847.2(TGFBR2);NM_001024934.1(WASF1);NM_001024935.1(WASF1);NM_001024936.1(WASF1);NM_001034954.1(SORBS1);NM_001034955.1(SORBS1);NM_001034956.1(SORBS1);NM_001034957.1(SORBS1);NM_001039802.1(CDC42);NM_001040000.2(AFDN);NM_001040056.2(MAPK3);NM_001042724.1(NECTIN2);NM_001079817.2…
path:hsa04072	Phospholipase D signaling pathway	905	29768	1025	39356	4.8599e-25	2.63245e-23	1.16731	NM_000054.4(AVPR2);NM_000207.2(INS);NM_000208.3(INSR);NM_000222.2(KIT);NM_000368.4(TSC1);NM_000490.4(AVP);NM_000516.5(GNAS);NM_000548.4(TSC2);NM_000706.4(AVPR1A);NM_000707.4(AVPR1B);NM_000839.4(GRM2);NM_000840.2(GRM3);NM_000841.3(GRM4);NM_000843.3(GRM6);NM_000844.3(GRM7);NM_000845.2(GRM8);NM_000899.4(KITLG);NM_000932.2(PLCB3);NM_000933.3(PLCB4);NM_001005336.2(DNM1);NM_001005360.2(DNM2);NM_0010053…
path:hsa05206	MicroRNAs in cancer	831	29768	940	39356	1.76843e-23	8.21055e-22	1.16878	NM_000038.5(APC);NM_000077.4(CDKN2A);NM_000104.3(CYP1B1);NM_000142.4(FGFR3);NM_000212.2(ITGB3);NM_000245.3(MET);NM_000314.6(PTEN);NM_000362.4(TIMP3);NM_000366.5(TPM1);NM_000389.4(CDKN1A);NM_000435.2(NOTCH3);NM_000546.5(TP53);NM_000610.3(CD44);NM_000633.2(BCL2);NM_000657.2(BCL2);NM_000782.4(CYP24A1);NM_000927.4(ABCB1);NM_000963.3(PTGS2);NM_001001389.1(CD44);NM_001001390.1(CD44);NM_001001391.1(CD44…
path:hsa04022	cGMP-PKG signaling pathway	937	29768	1070	39356	3.75834e-23	1.52682e-21	1.15776	NM_000024.5(ADRB2);NM_000025.2(ADRB3);NM_000069.2(CACNA1S);NM_000207.2(INS);NM_000208.3(INSR);NM_000603.4(NOS3);NM_000623.3(BDKRB2);NM_000674.2(ADORA1);NM_000678.3(ADRA1D);NM_000679.3(ADRA1B);NM_000680.3(ADRA1A);NM_000681.3(ADRA2A);NM_000682.6(ADRA2B);NM_000683.3(ADRA2C);NM_000684.2(ADRB1);NM_000701.7(ATP1A1);NM_000702.3(ATP1A2);NM_000719.6(CACNA1C);NM_000720.3(CACNA1D);NM_000855.2(GUCY1A2);NM_00…
path:hsa04360	Axon guidance	1262	29768	1474	39356	5.14586e-22	1.85823e-20	1.13194	NM_000193.3(SHH);NM_000245.3(MET);NM_000264.4(PTCH1);NM_000425.4(L1CAM);NM_000609.6(CXCL12);NM_000944.4(PPP3CA);NM_000945.3(PPP3R1);NM_001003407.1(ABLIM1);NM_001004720.2(NCK2);NM_001004722.3(NCK2);NM_001005861.2(RYK);NM_001005914.2(SEMA3B);NM_001006943.2(EPHA8);NM_001008493.2(ENAH);NM_001014794.2(ILK);NM_001014795.2(ILK);NM_001014831.2(PAK4);NM_001014832.1(PAK4);NM_001014834.2(PAK4);NM_001014835.…
path:hsa05205	Proteoglycans in cancer	1294	29768	1517	39356	3.06074e-21	9.94741e-20	1.12774	NM_000037.3(ANK1);NM_000125.3(ESR1);NM_000193.3(SHH);NM_000212.2(ITGB3);NM_000245.3(MET);NM_000264.4(PTCH1);NM_000362.4(TIMP3);NM_000389.4(CDKN1A);NM_000474.3(TWIST1);NM_000546.5(TP53);NM_000594.3(TNF);NM_000601.5(HGF);NM_000610.3(CD44);NM_000612.5(IGF2);NM_000618.4(IGF1);NM_000638.3(VTN);NM_000639.2(FASLG);NM_000660.6(TGFB1);NM_000875.4(IGF1R);NM_001001389.1(CD44);NM_001001390.1(CD44);NM_0010013…
path:hsa04512	ECM-receptor interaction	451	29768	491	39356	5.59749e-21	1.65381e-19	1.21438	NM_000088.3(COL1A1);NM_000089.3(COL1A2);NM_000091.4(COL4A3);NM_000092.4(COL4A4);NM_000095.2(COMP);NM_000173.6(GP1BA);NM_000174.4(GP9);NM_000210.3(ITGA6);NM_000212.2(ITGB3);NM_000213.4(ITGB4);NM_000227.4(LAMA3);NM_000228.2(LAMB3);NM_000407.4(GP1BB);NM_000419.4(ITGA2B);NM_000426.3(LAMA2);NM_000495.4(COL4A5);NM_000552.4(VWF);NM_000610.3(CD44);NM_000638.3(VTN);NM_000885.5(ITGA4);NM_000888.4(ITGB6);NM…
path:hsa04510	Focal adhesion	1199	29768	1401	39356	7.85769e-21	2.12812e-19	1.13147	NM_000088.3(COL1A1);NM_000089.3(COL1A2);NM_000091.4(COL4A3);NM_000092.4(COL4A4);NM_000095.2(COMP);NM_000210.3(ITGA6);NM_000212.2(ITGB3);NM_000213.4(ITGB4);NM_000227.4(LAMA3);NM_000228.2(LAMB3);NM_000245.3(MET);NM_000314.6(PTEN);NM_000419.4(ITGA2B);NM_000426.3(LAMA2);NM_000432.3(MYL2);NM_000495.4(COL4A5);NM_000552.4(VWF);NM_000601.5(HGF);NM_000618.4(IGF1);NM_000633.2(BCL2);NM_000638.3(VTN);NM_0006…
path:hsa04925	Aldosterone synthesis and secretion	681	29768	767	39356	1.37469e-20	3.43673e-19	1.17385	NM_000069.2(CACNA1S);NM_000349.2(STAR);NM_000498.3(CYP11B2);NM_000500.7(CYP21A2);NM_000516.5(GNAS);NM_000527.4(LDLR);NM_000701.7(ATP1A1);NM_000702.3(ATP1A2);NM_000719.6(CACNA1C);NM_000720.3(CACNA1D);NM_000781.2(CYP11A1);NM_000890.4(KCNJ5);NM_000906.3(NPR1);NM_000932.2(PLCB3);NM_000933.3(PLCB4);NM_000939.3(POMC);NM_001001323.1(ATP2B1);NM_001001331.3(ATP2B2);NM_001001344.2(ATP2B3);NM_001001396.2(AT…
path:hsa04911	Insulin secretion	678	29768	764	39356	2.25175e-20	5.22728e-19	1.17327	NM_000069.2(CACNA1S);NM_000162.4(GCK);NM_000207.2(INS);NM_000209.3(PDX1);NM_000352.4(ABCC8);NM_000516.5(GNAS);NM_000525.3(KCNJ11);NM_000701.7(ATP1A1);NM_000702.3(ATP1A2);NM_000719.6(CACNA1C);NM_000720.3(CACNA1D);NM_000740.3(CHRM3);NM_000932.2(PLCB3);NM_000933.3(PLCB4);NM_001011666.2(CREB5);NM_001014797.2(KCNMA1);NM_001035.2(RYR2);NM_001077488.3(GNAS);NM_001077489.3(GNAS);NM_001077490.2(GNAS);NM_0…
path:hsa05165	Human papillomavirus infection	1808	29768	2165	39356	4.12431e-20	8.93601e-19	1.10408	NM_000021.3(PSEN1);NM_000038.5(APC);NM_000088.3(COL1A1);NM_000089.3(COL1A2);NM_000091.4(COL4A3);NM_000092.4(COL4A4);NM_000095.2(COMP);NM_000210.3(ITGA6);NM_000212.2(ITGB3);NM_000213.4(ITGB4);NM_000214.2(JAG1);NM_000227.4(LAMA3);NM_000228.2(LAMB3);NM_000314.6(PTEN);NM_000321.2(RB1);NM_000368.4(TSC1);NM_000389.4(CDKN1A);NM_000419.4(ITGA2B);NM_000426.3(LAMA2);NM_000435.2(NOTCH3);NM_000462.4(UBE3A);N…
path:hsa04928	Parathyroid hormone synthesis, secretion and action	646	29768	730	39356	8.76251e-19	1.77988e-17	1.16996	NM_000316.2(PTH1R);NM_000376.2(VDR);NM_000388.3(CASR);NM_000389.4(CDKN1A);NM_000516.5(GNAS);NM_000633.2(BCL2);NM_000657.2(BCL2);NM_000782.4(CYP24A1);NM_000785.3(CYP27B1);NM_000923.5(PDE4C);NM_000932.2(PLCB3);NM_000933.3(PLCB4);NM_001002295.1(GATA3);NM_001011666.2(CREB5);NM_001015051.3(RUNX2);NM_001017535.1(VDR);NM_001017536.1(VDR);NM_001024630.3(RUNX2);NM_001040056.2(MAPK3);NM_001077488.3(GNAS);N…
path:hsa04934	Cushing syndrome	950	29768	1102	39356	1.01547e-18	1.94134e-17	1.13973	NM_000038.5(APC);NM_000069.2(CACNA1S);NM_000077.4(CDKN2A);NM_000102.3(CYP17A1);NM_000143.3(FH);NM_000244.3(MEN1);NM_000321.2(RB1);NM_000349.2(STAR);NM_000389.4(CDKN1A);NM_000497.3(CYP11B1);NM_000500.7(CYP21A2);NM_000516.5(GNAS);NM_000527.4(LDLR);NM_000719.6(CACNA1C);NM_000720.3(CACNA1D);NM_000756.3(CRH);NM_000781.2(CYP11A1);NM_000932.2(PLCB3);NM_000933.3(PLCB4);NM_000939.3(POMC);NM_001003406.1(CA…
path:hsa05410	Hypertrophic cardiomyopathy (HCM)	558	29768	631	39356	2.8837e-16	5.20668e-15	1.16914	NM_000023.3(SGCA);NM_000029.3(AGT);NM_000069.2(CACNA1S);NM_000109.3(DMD);NM_000117.2(EMD);NM_000210.3(ITGA6);NM_000212.2(ITGB3);NM_000213.4(ITGB4);NM_000231.2(SGCG);NM_000232.4(SGCB);NM_000256.3(MYBPC3);NM_000258.2(MYL3);NM_000337.5(SGCD);NM_000363.4(TNNI3);NM_000364.3(TNNT2);NM_000366.5(TPM1);NM_000419.4(ITGA2B);NM_000426.3(LAMA2);NM_000432.3(MYL2);NM_000594.3(TNF);NM_000600.4(IL6);NM_000618.4(I…
path:hsa05215	Prostate cancer	601	29768	685	39356	1.02591e-15	1.75485e-14	1.15997	NM_000044.4(AR);NM_000141.4(FGFR2);NM_000207.2(INS);NM_000314.6(PTEN);NM_000321.2(RB1);NM_000389.4(CDKN1A);NM_000546.5(TP53);NM_000618.4(IGF1);NM_000633.2(BCL2);NM_000657.2(BCL2);NM_000852.3(GSTP1);NM_000875.4(IGF1R);NM_000930.4(PLAT);NM_001005862.2(ERBB2);NM_001011645.3(AR);NM_001011666.2(CREB5);NM_001014431.1(AKT1);NM_001014432.1(AKT1);NM_001017963.2(HSP90AA1);NM_001030047.1(KLK3);NM_001030048.…
path:hsa00564	Glycerophospholipid metabolism	604	29768	690	39356	2.59294e-15	4.21352e-14	1.15731	NM_000116.4(TAZ);NM_000229.1(LCAT);NM_000300.3(PLA2G2A);NM_000408.4(GPD2);NM_000665.4(ACHE);NM_000928.2(PLA2G1B);NM_000929.2(PLA2G5);NM_001004426.2(PLA2G6);NM_001012727.1(AGPAT2);NM_001013742.3(DGKK);NM_001030059.2(PLPP4);NM_001031696.3(PLD3);NM_001037553.1(AGPAT3);NM_001039481.1(ETNK1);NM_001080480.2(MBOAT1);NM_001080744.1(DGKG);NM_001080745.1(DGKG);NM_001083112.2(GPD2);NM_001098537.2(PNPLA7);NM…
path:hsa04725	Cholinergic synapse	704	29768	813	39356	3.68831e-15	5.70809e-14	1.14484	NM_000068.3(CACNA1A);NM_000069.2(CACNA1S);NM_000218.2(KCNQ1);NM_000633.2(BCL2);NM_000657.2(BCL2);NM_000665.4(ACHE);NM_000718.3(CACNA1B);NM_000719.6(CACNA1C);NM_000720.3(CACNA1D);NM_000738.2(CHRM1);NM_000739.2(CHRM2);NM_000740.3(CHRM3);NM_000741.3(CHRM4);NM_000743.4(CHRNA3);NM_000744.6(CHRNA4);NM_000746.5(CHRNA7);NM_000748.2(CHRNB2);NM_000750.4(CHRNB4);NM_000891.2(KCNJ2);NM_000932.2(PLCB3);NM_0009…
path:hsa04390	Hippo signaling pathway	867	29768	1016	39356	9.971e-15	1.47299e-13	1.1282	NM_000038.5(APC);NM_000211.4(ITGB2);NM_000268.3(NF2);NM_000479.4(AMH);NM_000557.4(GDF5);NM_000602.4(SERPINE1);NM_000660.6(TGFB1);NM_000800.4(FGF1);NM_001001557.3(GDF6);NM_001003652.3(SMAD2);NM_001003688.1(SMAD1);NM_001008709.1(PPP1CA);NM_001009552.1(PPP2CB);NM_001012270.1(BIRC5);NM_001012271.1(BIRC5);NM_001015002.1(LLGL2);NM_001024847.2(TGFBR2);NM_001031685.2(TP53BP2);NM_001031803.1(LLGL2);NM_001…
path:hsa04062	Chemokine signaling pathway	915	29768	1076	39356	1.23582e-14	1.74626e-13	1.12427	NM_000215.3(JAK3);NM_000265.5(NCF1);NM_000377.2(WAS);NM_000609.6(CXCL12);NM_000932.2(PLCB3);NM_000933.3(PLCB4);NM_001004056.1(GRK4);NM_001004057.1(GRK4);NM_001004105.2(GRK6);NM_001004106.2(GRK6);NM_001010855.3(PIK3R6);NM_001010935.2(RAP1A);NM_001010942.2(RAP1B);NM_001014431.1(AKT1);NM_001014432.1(AKT1);NM_001017998.3(GNG10);NM_001024644.1(XCR1);NM_001033581.2(PRKCZ);NM_001033582.2(PRKCZ);NM_00103…
path:hsa04370	VEGF signaling pathway	362	29768	400	39356	1.70169e-14	2.30437e-13	1.19649	NM_000603.4(NOS3);NM_000944.4(PPP3CA);NM_000945.3(PPP3R1);NM_000963.3(PTGS2);NM_001014431.1(AKT1);NM_001014432.1(AKT1);NM_001025366.2(VEGFA);NM_001025367.2(VEGFA);NM_001025368.2(VEGFA);NM_001025369.2(VEGFA);NM_001025370.2(VEGFA);NM_001033756.2(VEGFA);NM_001039802.1(CDC42);NM_001040056.2(MAPK3);NM_001080855.2(PXN);NM_001109891.1(MAPK3);NM_001114172.1(PIK3R3);NM_001114633.1(PLA2G4B);NM_001130442.2(…
path:hsa05412	Arrhythmogenic right ventricular cardiomyopathy (ARVC)	547	29768	627	39356	2.20112e-13	2.86145e-12	1.1534	NM_000023.3(SGCA);NM_000069.2(CACNA1S);NM_000109.3(DMD);NM_000117.2(EMD);NM_000165.4(GJA1);NM_000210.3(ITGA6);NM_000212.2(ITGB3);NM_000213.4(ITGB4);NM_000231.2(SGCG);NM_000232.4(SGCB);NM_000337.5(SGCD);NM_000419.4(ITGA2B);NM_000426.3(LAMA2);NM_000719.6(CACNA1C);NM_000720.3(CACNA1D);NM_000722.3(CACNA2D1);NM_000723.4(CACNB1);NM_000724.3(CACNB2);NM_000725.3(CACNB3);NM_000726.4(CACNB4);NM_000727.3(CA…
path:hsa04713	Circadian entrainment	688	29768	803	39356	1.01404e-12	1.26755e-11	1.13275	NM_000516.5(GNAS);NM_000540.2(RYR1);NM_000620.4(NOS1);NM_000719.6(CACNA1C);NM_000720.3(CACNA1D);NM_000827.3(GRIA1);NM_000832.6(GRIN1);NM_000833.4(GRIN2A);NM_000834.4(GRIN2B);NM_000835.4(GRIN2C);NM_000836.2(GRIN2D);NM_000855.2(GUCY1A2);NM_000856.5(GUCY1A1);NM_000857.3(GUCY1B1);NM_000890.4(KCNJ5);NM_000932.2(PLCB3);NM_000933.3(PLCB4);NM_001003406.1(CACNA1I);NM_001005407.1(CACNA1H);NM_001017998.3(GN…
path:hsa04270	Vascular smooth muscle contraction	754	29768	886	39356	1.91029e-12	2.29942e-11	1.12512	NM_000029.3(AGT);NM_000069.2(CACNA1S);NM_000300.3(PLA2G2A);NM_000490.4(AVP);NM_000516.5(GNAS);NM_000675.5(ADORA2A);NM_000676.2(ADORA2B);NM_000678.3(ADRA1D);NM_000679.3(ADRA1B);NM_000680.3(ADRA1A);NM_000706.4(AVPR1A);NM_000707.4(AVPR1B);NM_000719.6(CACNA1C);NM_000720.3(CACNA1D);NM_000855.2(GUCY1A2);NM_000856.5(GUCY1A1);NM_000857.3(GUCY1B1);NM_000906.3(NPR1);NM_000928.2(PLA2G1B);NM_000929.2(PLA2G5)…
path:hsa04611	Platelet activation	632	29768	738	39356	1.02846e-11	1.19375e-10	1.1322	NM_000088.3(COL1A1);NM_000089.3(COL1A2);NM_000090.3(COL3A1);NM_000173.6(GP1BA);NM_000174.4(GP9);NM_000212.2(ITGB3);NM_000407.4(GP1BB);NM_000419.4(ITGA2B);NM_000508.4(FGA);NM_000516.5(GNAS);NM_000552.4(VWF);NM_000603.4(NOS3);NM_000855.2(GUCY1A2);NM_000856.5(GUCY1A1);NM_000857.3(GUCY1B1);NM_000932.2(PLCB3);NM_000933.3(PLCB4);NM_000960.3(PTGIR);NM_000962.3(PTGS1);NM_001008709.1(PPP1CA);NM_001010855.…
path:hsa04730	Long-term depression	315	29768	352	39356	2.90348e-11	3.2539e-10	1.18312	NM_000068.3(CACNA1A);NM_000516.5(GNAS);NM_000540.2(RYR1);NM_000618.4(IGF1);NM_000620.4(NOS1);NM_000756.3(CRH);NM_000827.3(GRIA1);NM_000855.2(GUCY1A2);NM_000856.5(GUCY1A1);NM_000857.3(GUCY1B1);NM_000875.4(IGF1R);NM_000932.2(PLCB3);NM_000933.3(PLCB4);NM_001009552.1(PPP2CB);NM_001040056.2(MAPK3);NM_001042723.1(RYR1);NM_001077488.3(GNAS);NM_001077489.3(GNAS);NM_001077490.2(GNAS);NM_001098512.2(PRKG1)…
path:hsa04724	Glutamatergic synapse	640	29768	751	39356	5.24918e-11	5.68661e-10	1.12668	NM_000068.3(CACNA1A);NM_000516.5(GNAS);NM_000719.6(CACNA1C);NM_000720.3(CACNA1D);NM_000827.3(GRIA1);NM_000830.4(GRIK1);NM_000831.3(GRIK3);NM_000832.6(GRIN1);NM_000833.4(GRIN2A);NM_000834.4(GRIN2B);NM_000835.4(GRIN2C);NM_000836.2(GRIN2D);NM_000839.4(GRM2);NM_000840.2(GRM3);NM_000841.3(GRM4);NM_000843.3(GRM6);NM_000844.3(GRM7);NM_000845.2(GRM8);NM_000932.2(PLCB3);NM_000933.3(PLCB4);NM_000944.4(PPP3…
path:hsa05163	Human cytomegalovirus infection	1076	29768	1297	39356	5.61634e-11	5.8881e-10	1.09682	NM_000077.4(CDKN2A);NM_000212.2(ITGB3);NM_000321.2(RB1);NM_000368.4(TSC1);NM_000389.4(CDKN1A);NM_000516.5(GNAS);NM_000544.3(TAP2);NM_000546.5(TP53);NM_000548.4(TSC2);NM_000565.3(IL6R);NM_000593.5(TAP1);NM_000594.3(TNF);NM_000600.4(IL6);NM_000605.3(IFNA2);NM_000609.6(CXCL12);NM_000628.4(IL10RB);NM_000639.2(FASLG);NM_000877.3(IL1R1);NM_000932.2(PLCB3);NM_000933.3(PLCB4);NM_000944.4(PPP3CA);NM_00094…
path:hsa04970	Salivary secretion	484	29768	559	39356	7.58522e-11	7.48259e-10	1.14471	NM_000024.5(ADRB2);NM_000025.2(ADRB3);NM_000099.3(CST3);NM_000516.5(GNAS);NM_000620.4(NOS1);NM_000678.3(ADRA1D);NM_000679.3(ADRA1B);NM_000680.3(ADRA1A);NM_000684.2(ADRB1);NM_000701.7(ATP1A1);NM_000702.3(ATP1A2);NM_000740.3(CHRM3);NM_000855.2(GUCY1A2);NM_000856.5(GUCY1A1);NM_000857.3(GUCY1B1);NM_000932.2(PLCB3);NM_000933.3(PLCB4);NM_001001323.1(ATP2B1);NM_001001331.3(ATP2B2);NM_001001344.2(ATP2B3)…
path:hsa04261	Adrenergic signaling in cardiomyocytes	961	29768	1153	39356	7.59771e-11	7.48259e-10	1.10193	NM_000024.5(ADRB2);NM_000069.2(CACNA1S);NM_000218.2(KCNQ1);NM_000219.5(KCNE1);NM_000258.2(MYL3);NM_000335.4(SCN5A);NM_000363.4(TNNI3);NM_000364.3(TNNT2);NM_000366.5(TPM1);NM_000432.3(MYL2);NM_000516.5(GNAS);NM_000633.2(BCL2);NM_000657.2(BCL2);NM_000678.3(ADRA1D);NM_000679.3(ADRA1B);NM_000680.3(ADRA1A);NM_000684.2(ADRB1);NM_000701.7(ATP1A1);NM_000702.3(ATP1A2);NM_000719.6(CACNA1C);NM_000720.3(CACN…
path:hsa04070	Phosphatidylinositol signaling system	748	29768	888	39356	1.76205e-10	1.68431e-09	1.11365	NM_000314.6(PTEN);NM_000932.2(PLCB3);NM_000933.3(PLCB4);NM_001002837.2(INPP5J);NM_001005909.2(IP6K2);NM_001005910.2(IP6K2);NM_001005911.2(IP6K2);NM_001006115.2(IP6K1);NM_001013742.3(DGKK);NM_001017915.2(INPP5D);NM_001031733.2(CALML4);NM_001077525.2(MTMR14);NM_001077526.2(MTMR14);NM_001080744.1(DGKG);NM_001080745.1(DGKG);NM_001099952.2(ITPR1);NM_001100814.2(PIP4P1);NM_001101669.2(INPP4B);NM_001105…
path:hsa05414	Dilated cardiomyopathy (DCM)	582	29768	684	39356	6.65575e-10	6.18034e-09	1.12494	NM_000023.3(SGCA);NM_000069.2(CACNA1S);NM_000109.3(DMD);NM_000117.2(EMD);NM_000210.3(ITGA6);NM_000212.2(ITGB3);NM_000213.4(ITGB4);NM_000231.2(SGCG);NM_000232.4(SGCB);NM_000256.3(MYBPC3);NM_000258.2(MYL3);NM_000337.5(SGCD);NM_000363.4(TNNI3);NM_000364.3(TNNT2);NM_000366.5(TPM1);NM_000419.4(ITGA2B);NM_000426.3(LAMA2);NM_000432.3(MYL2);NM_000516.5(GNAS);NM_000594.3(TNF);NM_000618.4(IGF1);NM_000660.6…
path:hsa04927	Cortisol synthesis and secretion	433	29768	500	39356	7.02543e-10	6.34241e-09	1.14493	NM_000069.2(CACNA1S);NM_000102.3(CYP17A1);NM_000349.2(STAR);NM_000475.4(NR0B1);NM_000497.3(CYP11B1);NM_000500.7(CYP21A2);NM_000516.5(GNAS);NM_000527.4(LDLR);NM_000719.6(CACNA1C);NM_000720.3(CACNA1D);NM_000781.2(CYP11A1);NM_000932.2(PLCB3);NM_000933.3(PLCB4);NM_000939.3(POMC);NM_001003406.1(CACNA1I);NM_001005407.1(CACNA1H);NM_001011666.2(CREB5);NM_001017424.2(KCNK2);NM_001017425.2(KCNK2);NM_001026…
path:hsa04010	MAPK signaling pathway	1642	29768	2025	39356	1.04268e-09	9.15872e-09	1.07204	NM_000068.3(CACNA1A);NM_000069.2(CACNA1S);NM_000141.4(FGFR2);NM_000142.4(FGFR3);NM_000207.2(INS);NM_000208.3(INSR);NM_000222.2(KIT);NM_000245.3(MET);NM_000267.3(NF1);NM_000546.5(TP53);NM_000591.3(CD14);NM_000594.3(TNF);NM_000601.5(HGF);NM_000612.5(IGF2);NM_000618.4(IGF1);NM_000639.2(FASLG);NM_000660.6(TGFB1);NM_000718.3(CACNA1B);NM_000719.6(CACNA1C);NM_000720.3(CACNA1D);NM_000721.3(CACNA1E);NM_00…
path:hsa05222	Small cell lung cancer	528	29768	619	39356	1.85586e-09	1.58725e-08	1.12773	NM_000091.4(COL4A3);NM_000092.4(COL4A4);NM_000107.2(DDB2);NM_000210.3(ITGA6);NM_000227.4(LAMA3);NM_000228.2(LAMB3);NM_000314.6(PTEN);NM_000321.2(RB1);NM_000389.4(CDKN1A);NM_000419.4(ITGA2B);NM_000426.3(LAMA2);NM_000495.4(COL4A5);NM_000546.5(TP53);NM_000625.4(NOS2);NM_000633.2(BCL2);NM_000657.2(BCL2);NM_000963.3(PTGS2);NM_001014431.1(AKT1);NM_001014432.1(AKT1);NM_001017402.1(LAMB3);NM_001033910.2(…
path:hsa05224	Breast cancer	667	29768	793	39356	2.83887e-09	2.36572e-08	1.11202	NM_000038.5(APC);NM_000107.2(DDB2);NM_000125.3(ESR1);NM_000214.2(JAG1);NM_000222.2(KIT);NM_000314.6(PTEN);NM_000321.2(RB1);NM_000389.4(CDKN1A);NM_000435.2(NOTCH3);NM_000546.5(TP53);NM_000618.4(IGF1);NM_000800.4(FGF1);NM_000875.4(IGF1R);NM_000926.4(PGR);NM_001005862.2(ERBB2);NM_001010926.3(HES5);NM_001014431.1(AKT1);NM_001014432.1(AKT1);NM_001040056.2(MAPK3);NM_001040708.1(HEY1);NM_001077494.3(NFK…
path:hsa04550	Signaling pathways regulating pluripotency of stem cells	603	29768	714	39356	4.31459e-09	3.5056e-08	1.11656	NM_000038.5(APC);NM_000141.4(FGFR2);NM_000142.4(FGFR3);NM_000215.3(JAK3);NM_000545.6(HNF1A);NM_000618.4(IGF1);NM_000875.4(IGF1R);NM_001001419.2(SMAD5);NM_001001420.2(SMAD5);NM_001003652.3(SMAD2);NM_001003688.1(SMAD1);NM_001011663.1(PCGF6);NM_001014431.1(AKT1);NM_001014432.1(AKT1);NM_001040056.2(MAPK3);NM_001098209.1(CTNNB1);NM_001098210.1(CTNNB1);NM_001105.4(ACVR1);NM_001106.3(ACVR2B);NM_00110989…
path:hsa05221	Acute myeloid leukemia	404	29768	468	39356	6.31658e-09	5.00705e-08	1.14129	NM_000222.2(KIT);NM_000250.1(MPO);NM_000566.3(FCGR1A);NM_000588.3(IL3);NM_000591.3(CD14);NM_000632.3(ITGAM);NM_000758.3(CSF2);NM_000964.3(RARA);NM_001001890.2(RUNX1);NM_001014431.1(AKT1);NM_001014432.1(AKT1);NM_001018011.2(ZBTB16);NM_001024809.3(RARA);NM_001040021.2(CD14);NM_001040056.2(MAPK3);NM_001080547.1(SPI1);NM_001093772.1(KIT);NM_001099856.4(IKBKG);NM_001099857.2(IKBKG);NM_001109891.1(MAPK…
path:hsa04020	Calcium signaling pathway	1037	29768	1265	39356	2.21894e-08	1.71704e-07	1.0838	NM_000024.5(ADRB2);NM_000025.2(ADRB3);NM_000068.3(CACNA1A);NM_000069.2(CACNA1S);NM_000233.3(LHCGR);NM_000292.2(PHKA2);NM_000294.2(PHKG2);NM_000516.5(GNAS);NM_000540.2(RYR1);NM_000603.4(NOS3);NM_000620.4(NOS1);NM_000623.3(BDKRB2);NM_000625.4(NOS2);NM_000675.5(ADORA2A);NM_000676.2(ADORA2B);NM_000678.3(ADRA1D);NM_000679.3(ADRA1B);NM_000680.3(ADRA1A);NM_000684.2(ADRB1);NM_000706.4(AVPR1A);NM_000707.4…
path:hsa01521	EGFR tyrosine kinase inhibitor resistance	472	29768	556	39356	5.03805e-08	3.80783e-07	1.12235	NM_000141.4(FGFR2);NM_000142.4(FGFR3);NM_000245.3(MET);NM_000267.3(NF1);NM_000314.6(PTEN);NM_000565.3(IL6R);NM_000600.4(IL6);NM_000601.5(HGF);NM_000618.4(IGF1);NM_000633.2(BCL2);NM_000657.2(BCL2);NM_000820.3(GAS6);NM_000875.4(IGF1R);NM_001005862.2(ERBB2);NM_001010931.2(HGF);NM_001010932.2(HGF);NM_001010933.2(HGF);NM_001010934.2(HGF);NM_001014431.1(AKT1);NM_001014432.1(AKT1);NM_001025366.2(VEGFA);…
path:hsa05214	Glioma	420	29768	492	39356	6.66997e-08	4.92668e-07	1.12861	NM_000077.4(CDKN2A);NM_000107.2(DDB2);NM_000314.6(PTEN);NM_000321.2(RB1);NM_000389.4(CDKN1A);NM_000546.5(TP53);NM_000618.4(IGF1);NM_000875.4(IGF1R);NM_001014431.1(AKT1);NM_001014432.1(AKT1);NM_001031733.2(CALML4);NM_001040056.2(MAPK3);NM_001099691.2(TGFA);NM_001109891.1(MAPK3);NM_001111283.2(IGF1);NM_001111284.1(IGF1);NM_001114172.1(PIK3R3);NM_001126112.2(TP53);NM_001126113.2(TP53);NM_001126114.2…
path:hsa04666	Fc gamma R-mediated phagocytosis	516	29768	612	39356	8.78647e-08	6.34578e-07	1.1147	NM_000177.4(GSN);NM_000265.5(NCF1);NM_000377.2(WAS);NM_000566.3(FCGR1A);NM_001004426.2(PLA2G6);NM_001005360.2(DNM2);NM_001005361.2(DNM2);NM_001005362.2(DNM2);NM_001014431.1(AKT1);NM_001014432.1(AKT1);NM_001014987.1(LAT);NM_001014988.1(LAT);NM_001014989.1(LAT);NM_001017915.2(INPP5D);NM_001024934.1(WASF1);NM_001024935.1(WASF1);NM_001024936.1(WASF1);NM_001031801.1(LIMK2);NM_001039802.1(CDC42);NM_001…
path:hsa04152	AMPK signaling pathway	691	29768	834	39356	2.26271e-07	1.59865e-06	1.0954	NM_000151.3(G6PC);NM_000207.2(INS);NM_000208.3(INSR);NM_000289.5(PFKM);NM_000368.4(TSC1);NM_000455.4(STK11);NM_000457.4(HNF4A);NM_000507.3(FBP1);NM_000548.4(TSC2);NM_000618.4(IGF1);NM_000680.3(ADRA1A);NM_000859.2(HMGCR);NM_000875.4(IGF1R);NM_001001548.2(CD36);NM_001002021.2(PFKL);NM_001003786.2(STRADA);NM_001003787.2(STRADA);NM_001003788.2(STRADA);NM_001005291.2(SREBF1);NM_001009552.1(PPP2CB);NM_…
path:hsa04972	Pancreatic secretion	453	29768	536	39356	2.91309e-07	2.01437e-06	1.11736	NM_000067.2(CA2);NM_000218.2(KCNQ1);NM_000300.3(PLA2G2A);NM_000516.5(GNAS);NM_000701.7(ATP1A1);NM_000702.3(ATP1A2);NM_000729.5(CCK);NM_000740.3(CHRM3);NM_000928.2(PLA2G1B);NM_000929.2(PLA2G5);NM_000932.2(PLCB3);NM_000933.3(PLCB4);NM_001001323.1(ATP2B1);NM_001001331.3(ATP2B2);NM_001001344.2(ATP2B3);NM_001001396.2(ATP2B4);NM_001010935.2(RAP1A);NM_001010942.2(RAP1B);NM_001014797.2(KCNMA1);NM_001035.…
path:hsa05200	Pathways in cancer	2603	29768	3289	39356	3.81929e-07	2.58598e-06	1.04634	NM_000038.5(APC);NM_000044.4(AR);NM_000077.4(CDKN2A);NM_000091.4(COL4A3);NM_000092.4(COL4A4);NM_000107.2(DDB2);NM_000121.3(EPOR);NM_000125.3(ESR1);NM_000141.4(FGFR2);NM_000142.4(FGFR3);NM_000143.3(FH);NM_000168.5(GLI3);NM_000193.3(SHH);NM_000206.2(IL2RG);NM_000210.3(ITGA6);NM_000214.2(JAG1);NM_000215.3(JAK3);NM_000222.2(KIT);NM_000227.4(LAMA3);NM_000228.2(LAMB3);NM_000245.3(MET);NM_000248.3(MITF)…
path:hsa04670	Leukocyte transendothelial migration	562	29768	674	39356	5.66378e-07	3.75659e-06	1.1024	NM_000201.2(ICAM1);NM_000211.4(ITGB2);NM_000265.5(NCF1);NM_000432.3(MYL2);NM_000433.3(NCF2);NM_000442.4(PECAM1);NM_000609.6(CXCL12);NM_000631.4(NCF4);NM_000632.3(ITGAM);NM_000885.5(ITGA4);NM_001010935.2(RAP1A);NM_001010942.2(RAP1B);NM_001030055.1(ARHGAP5);NM_001033886.2(CXCL12);NM_001039802.1(CDC42);NM_001040000.2(AFDN);NM_001079874.1(VAV3);NM_001080855.2(PXN);NM_001085458.1(CTNND1);NM_001085459.…
path:hsa05217	Basal cell carcinoma	300	29768	348	39356	7.17025e-07	4.66066e-06	1.13973	NM_000038.5(APC);NM_000107.2(DDB2);NM_000168.5(GLI3);NM_000193.3(SHH);NM_000264.4(PTCH1);NM_000389.4(CDKN1A);NM_000546.5(TP53);NM_001083602.2(PTCH1);NM_001083603.2(PTCH1);NM_001083604.2(PTCH1);NM_001083605.2(PTCH1);NM_001083606.2(PTCH1);NM_001083607.2(PTCH1);NM_001098209.1(CTNNB1);NM_001098210.1(CTNNB1);NM_001126112.2(TP53);NM_001126113.2(TP53);NM_001126114.2(TP53);NM_001126115.1(TP53);NM_0011261…
path:hsa05031	Amphetamine addiction	444	29768	528	39356	1.26925e-06	8.08838e-06	1.11176	NM_000240.3(MAOA);NM_000360.3(TH);NM_000516.5(GNAS);NM_000719.6(CACNA1C);NM_000720.3(CACNA1D);NM_000790.3(DDC);NM_000794.4(DRD1);NM_000827.3(GRIA1);NM_000832.6(GRIN1);NM_000833.4(GRIN2A);NM_000834.4(GRIN2B);NM_000835.4(GRIN2C);NM_000836.2(GRIN2D);NM_000898.4(MAOB);NM_000944.4(PPP3CA);NM_000945.3(PPP3R1);NM_001008709.1(PPP1CA);NM_001011666.2(CREB5);NM_001031733.2(CALML4);NM_001044.4(SLC6A3);NM_001…
path:hsa04211	Longevity regulating pathway	580	29768	699	39356	1.40239e-06	8.76496e-06	1.09701	NM_000207.2(INS);NM_000208.3(INSR);NM_000368.4(TSC1);NM_000455.4(STK11);NM_000546.5(TP53);NM_000548.4(TSC2);NM_000618.4(IGF1);NM_000636.3(SOD2);NM_000875.4(IGF1R);NM_001011666.2(CREB5);NM_001014431.1(AKT1);NM_001014432.1(AKT1);NM_001040633.1(PRKAG2);NM_001077183.2(TSC2);NM_001079817.2(INSR);NM_001083617.1(RB1CC1);NM_001098632.2(AKT1S1);NM_001098633.3(AKT1S1);NM_001098673.1(ATG101);NM_001099408.1(…
path:hsa00514	Other types of O-glycan biosynthesis	158	29768	176	39356	1.53468e-06	9.4108e-06	1.18688	NM_001005417.2(B4GALT2);NM_001040167.1(LFNG);NM_001040168.1(LFNG);NM_001077365.1(POMT1);NM_001077366.1(POMT1);NM_001084.4(PLOD3);NM_001099650.1(GXYLT1);NM_001136113.1(POMT1);NM_001136114.1(POMT1);NM_001142351.1(ST6GAL2);NM_001142352.1(ST6GAL2);NM_001166343.1(MFNG);NM_001166355.1(LFNG);NM_001199873.1(B4GALT3);NM_001199874.1(B4GALT3);NM_001270459.1(ST3GAL3);NM_001270460.1(ST3GAL3);NM_001270461.2(ST…
path:hsa05219	Bladder cancer	214	29768	244	39356	1.79303e-06	1.07914e-05	1.15954	NM_000077.4(CDKN2A);NM_000142.4(FGFR3);NM_000321.2(RB1);NM_000389.4(CDKN1A);NM_000546.5(TP53);NM_001005862.2(ERBB2);NM_001025366.2(VEGFA);NM_001025367.2(VEGFA);NM_001025368.2(VEGFA);NM_001025369.2(VEGFA);NM_001025370.2(VEGFA);NM_001033756.2(VEGFA);NM_001040056.2(MAPK3);NM_001109891.1(MAPK3);NM_001113755.2(TYMP);NM_001113756.2(TYMP);NM_001126112.2(TP53);NM_001126113.2(TP53);NM_001126114.2(TP53);NM…
path:hsa05218	Melanoma	353	29768	417	39356	4.14198e-06	2.44754e-05	1.11918	NM_000077.4(CDKN2A);NM_000107.2(DDB2);NM_000245.3(MET);NM_000248.3(MITF);NM_000314.6(PTEN);NM_000321.2(RB1);NM_000389.4(CDKN1A);NM_000546.5(TP53);NM_000601.5(HGF);NM_000618.4(IGF1);NM_000800.4(FGF1);NM_000875.4(IGF1R);NM_001010931.2(HGF);NM_001010932.2(HGF);NM_001010933.2(HGF);NM_001010934.2(HGF);NM_001014431.1(AKT1);NM_001014432.1(AKT1);NM_001040056.2(MAPK3);NM_001109891.1(MAPK3);NM_001111283.2(…
path:hsa04924	Renin secretion	426	29768	509	39356	5.80354e-06	3.36812e-05	1.1065	NM_000024.5(ADRB2);NM_000025.2(ADRB3);NM_000029.3(AGT);NM_000069.2(CACNA1S);NM_000516.5(GNAS);NM_000537.3(REN);NM_000674.2(ADORA1);NM_000684.2(ADRB1);NM_000719.6(CACNA1C);NM_000720.3(CACNA1D);NM_000789.3(ACE);NM_000855.2(GUCY1A2);NM_000856.5(GUCY1A1);NM_000857.3(GUCY1B1);NM_000891.2(KCNJ2);NM_000906.3(NPR1);NM_000921.4(PDE3A);NM_000922.3(PDE3B);NM_000924.3(PDE1B);NM_000932.2(PLCB3);NM_000933.3(PL…
path:hsa04136	Autophagy - other	214	29768	246	39356	6.82864e-06	3.89352e-05	1.15011	NM_001009552.1(PPP2CB);NM_001033518.1(WIPI2);NM_001033519.1(WIPI2);NM_001033520.1(WIPI2);NM_001077198.2(ATG9A);NM_001098673.1(ATG101);NM_001131028.1(ATG10);NM_001136031.2(ATG7);NM_001142610.1(ULK2);NM_001142673.2(ATG13);NM_001144912.1(ATG7);NM_001163034.1(RPTOR);NM_001190266.1(ATG16L1);NM_001190267.1(ATG16L1);NM_001199173.2(MLST8);NM_001199174.2(MLST8);NM_001199175.2(MLST8);NM_001205119.1(ATG13);…
path:hsa00260	Glycine, serine and threonine metabolism	166	29768	188	39356	1.01292e-05	5.67585e-05	1.16738	NM_000030.2(AGXT);NM_000071.2(CBS);NM_000156.5(GAMT);NM_000170.2(GLDC);NM_000240.3(MAOA);NM_000290.3(PGAM2);NM_000481.3(AMT);NM_000688.5(ALAS1);NM_000898.4(MAOB);NM_001029891.2(PGAM4);NM_001134707.1(SARDH);NM_001144951.1(GLYCTK);NM_001158.4(AOC2);NM_001164710.1(AMT);NM_001164711.1(AMT);NM_001164712.1(AMT);NM_001166356.1(SHMT2);NM_001166357.1(SHMT2);NM_001166358.1(SHMT2);NM_001166359.1(SHMT2);NM_0…
path:hsa05100	Bacterial invasion of epithelial cells	548	29768	665	39356	1.38648e-05	7.63738e-05	1.08948	NM_000245.3(MET);NM_000377.2(WAS);NM_001005336.2(DNM1);NM_001005360.2(DNM2);NM_001005361.2(DNM2);NM_001005362.2(DNM2);NM_001008491.2(SEPT2);NM_001014794.2(ILK);NM_001014795.2(ILK);NM_001024934.1(WASF1);NM_001024935.1(WASF1);NM_001024936.1(WASF1);NM_001039459.2(ELMO1);NM_001039802.1(CDC42);NM_001080855.2(PXN);NM_001098209.1(CTNNB1);NM_001098210.1(CTNNB1);NM_001098811.1(SEPT8);NM_001098812.1(SEPT8)…
path:hsa04144	Endocytosis	1269	29768	1587	39356	1.68254e-05	9.02069e-05	1.05717	NM_000141.4(FGFR2);NM_000142.4(FGFR3);NM_000206.2(IL2RG);NM_000377.2(WAS);NM_000527.4(LDLR);NM_000802.3(FOLR1);NM_000804.3(FOLR3);NM_000875.4(IGF1R);NM_000876.3(IGF2R);NM_000878.4(IL2RB);NM_001002261.3(ZFYVE27);NM_001002262.3(ZFYVE27);NM_001002814.2(RAB11FIP1);NM_001003652.3(SMAD2);NM_001004056.1(GRK4);NM_001004057.1(GRK4);NM_001004105.2(GRK6);NM_001004106.2(GRK6);NM_001005336.2(DNM1);NM_00100536…
path:hsa04540	Gap junction	439	29768	528	39356	1.69312e-05	9.02069e-05	1.09924	NM_000165.4(GJA1);NM_000516.5(GNAS);NM_000684.2(ADRB1);NM_000794.4(DRD1);NM_000795.3(DRD2);NM_000855.2(GUCY1A2);NM_000856.5(GUCY1A1);NM_000857.3(GUCY1B1);NM_000868.3(HTR2C);NM_000932.2(PLCB3);NM_000933.3(PLCB4);NM_001040056.2(MAPK3);NM_001069.2(TUBB2A);NM_001077488.3(GNAS);NM_001077489.3(GNAS);NM_001077490.2(GNAS);NM_001098512.2(PRKG1);NM_001099952.2(ITPR1);NM_001109891.1(MAPK3);NM_001114.4(ADCY7…
path:hsa04721	Synaptic vesicle cycle	340	29768	404	39356	1.83808e-05	9.63511e-05	1.11265	NM_000068.3(CACNA1A);NM_000718.3(CACNA1B);NM_001005336.2(DNM1);NM_001005360.2(DNM2);NM_001005361.2(DNM2);NM_001005362.2(DNM2);NM_001008220.1(CPLX2);NM_001025205.1(AP2M1);NM_001030005.2(CPLX3);NM_001030006.1(AP2B1);NM_001032221.3(STXBP1);NM_001039362.1(ATP6V1C2);NM_001039457.2(ATP6V0B);NM_001080421.2(UNC13A);NM_001100592.2(ATP6V0E2);NM_001127221.1(CACNA1A);NM_001127222.1(CACNA1A);NM_001130020.1(AT…
path:hsa04916	Melanogenesis	558	29768	679	39356	2.1746e-05	0.000112182	1.08649	NM_000222.2(KIT);NM_000248.3(MITF);NM_000516.5(GNAS);NM_000550.2(TYRP1);NM_000899.4(KITLG);NM_000932.2(PLCB3);NM_000933.3(PLCB4);NM_000939.3(POMC);NM_001031733.2(CALML4);NM_001035256.2(POMC);NM_001040056.2(MAPK3);NM_001077488.3(GNAS);NM_001077489.3(GNAS);NM_001077490.2(GNAS);NM_001079846.1(CREBBP);NM_001093772.1(KIT);NM_001098209.1(CTNNB1);NM_001098210.1(CTNNB1);NM_001109891.1(MAPK3);NM_001114.4(…
path:hsa04971	Gastric acid secretion	441	29768	532	39356	2.96319e-05	0.000150475	1.09594	NM_000067.2(CA2);NM_000218.2(KCNQ1);NM_000516.5(GNAS);NM_000701.7(ATP1A1);NM_000702.3(ATP1A2);NM_000704.2(ATP4A);NM_000705.3(ATP4B);NM_000740.3(CHRM3);NM_000805.4(GAST);NM_000891.2(KCNJ2);NM_000932.2(PLCB3);NM_000933.3(PLCB4);NM_001011552.3(SLC9A4);NM_001012418.4(MYLK4);NM_001017424.2(KCNK2);NM_001017425.2(KCNK2);NM_001031733.2(CALML4);NM_001048.3(SST);NM_001050.2(SSTR2);NM_001077488.3(GNAS);NM_0…
path:hsa04530	Tight junction	962	29768	1196	39356	3.48657e-05	0.000174329	1.06342	NM_000268.3(NF2);NM_000377.2(WAS);NM_000432.3(MYL2);NM_000455.4(STK11);NM_000720.3(CACNA1D);NM_001001890.2(RUNX1);NM_001005386.2(ACTR2);NM_001005862.2(ERBB2);NM_001006634.2(ARHGAP17);NM_001009552.1(PPP2CB);NM_001010935.2(RAP1A);NM_001015002.1(LLGL2);NM_001017967.3(MARVELD3);NM_001031803.1(LLGL2);NM_001033057.1(MAGI1);NM_001033581.2(PRKCZ);NM_001033582.2(PRKCZ);NM_001037281.1(PARD6A);NM_001039802.…
path:hsa05202	Transcriptional misregulation in cancer	1065	29768	1329	39356	4.19736e-05	0.000206688	1.05946	NM_000107.2(DDB2);NM_000244.3(MEN1);NM_000245.3(MET);NM_000248.3(MITF);NM_000250.1(MPO);NM_000378.5(WT1);NM_000389.4(CDKN1A);NM_000438.5(PAX3);NM_000503.5(EYA1);NM_000546.5(TP53);NM_000566.3(FCGR1A);NM_000588.3(IL3);NM_000591.3(CD14);NM_000598.4(IGFBP3);NM_000600.4(IL6);NM_000618.4(IGF1);NM_000632.3(ITGAM);NM_000758.3(CSF2);NM_000860.5(HPGD);NM_000875.4(IGF1R);NM_000878.4(IL2RB);NM_000889.2(ITGB7…
path:hsa04974	Protein digestion and absorption	405	29768	488	39356	4.95055e-05	0.000240139	1.09723	NM_000088.3(COL1A1);NM_000089.3(COL1A2);NM_000090.3(COL3A1);NM_000091.4(COL4A3);NM_000092.4(COL4A4);NM_000093.4(COL5A1);NM_000094.3(COL7A1);NM_000218.2(KCNQ1);NM_000341.3(SLC3A1);NM_000393.4(COL5A2);NM_000493.3(COL10A1);NM_000494.3(COL17A1);NM_000495.4(COL4A5);NM_000501.3(ELN);NM_000701.7(ATP1A1);NM_000702.3(ATP1A2);NM_001003841.2(SLC6A19);NM_001013251.2(SLC3A2);NM_001079807.3(PGA3);NM_001079808.…
path:hsa04371	Apelin signaling pathway	719	29768	887	39356	5.62787e-05	0.000268979	1.07168	NM_000214.2(JAG1);NM_000258.2(MYL3);NM_000432.3(MYL2);NM_000435.2(NOTCH3);NM_000540.2(RYR1);NM_000602.4(SERPINE1);NM_000603.4(NOS3);NM_000620.4(NOS1);NM_000625.4(NOS2);NM_000922.3(PDE3B);NM_000930.4(PLAT);NM_000932.2(PLCB3);NM_000933.3(PLCB4);NM_001002841.1(MYL4);NM_001003652.3(SMAD2);NM_001010855.3(PIK3R6);NM_001012418.4(MYLK4);NM_001014431.1(AKT1);NM_001014432.1(AKT1);NM_001015053.1(HDAC5);NM_0…
path:hsa00515	Mannose type O-glycan biosynthesis	197	29768	229	39356	7.33393e-05	0.000345439	1.13734	NM_001005417.2(B4GALT2);NM_001039885.2(FKRP);NM_001077365.1(POMT1);NM_001077366.1(POMT1);NM_001079802.1(FKTN);NM_001101417.3(ISPD);NM_001101426.3(ISPD);NM_001136113.1(POMT1);NM_001136114.1(POMT1);NM_001198963.1(FKTN);NM_001199172.1(MGAT5B);NM_001199873.1(B4GALT3);NM_001199874.1(B4GALT3);NM_001243766.1(POMGNT1);NM_001270459.1(ST3GAL3);NM_001270460.1(ST3GAL3);NM_001270461.2(ST3GAL3);NM_001270462.2(…
path:hsa04064	NF-kappa B signaling pathway	411	29768	498	39356	0.000119811	0.000556263	1.09112	NM_000074.2(CD40LG);NM_000201.2(ICAM1);NM_000591.3(CD14);NM_000594.3(TNF);NM_000595.3(LTA);NM_000609.6(CXCL12);NM_000633.2(BCL2);NM_000657.2(BCL2);NM_000877.3(IL1R1);NM_000963.3(PTGS2);NM_001014987.1(LAT);NM_001014988.1(LAT);NM_001014989.1(LAT);NM_001025242.1(IRAK1);NM_001025243.1(IRAK1);NM_001033886.2(CXCL12);NM_001033910.2(TRAF5);NM_001039661.1(TIRAP);NM_001040021.2(CD14);NM_001042771.2(LCK);NM…
path:hsa04024	cAMP signaling pathway	1098	29768	1379	39356	0.000200643	0.000918435	1.05269	NM_000024.5(ADRB2);NM_000069.2(CACNA1S);NM_000164.3(GIPR);NM_000168.5(GLI3);NM_000264.4(PTCH1);NM_000346.3(SOX9);NM_000363.4(TNNI3);NM_000369.2(TSHR);NM_000479.4(AMH);NM_000516.5(GNAS);NM_000524.3(HTR1A);NM_000674.2(ADORA1);NM_000675.5(ADORA2A);NM_000684.2(ADRB1);NM_000701.7(ATP1A1);NM_000702.3(ATP1A2);NM_000719.6(CACNA1C);NM_000720.3(CACNA1D);NM_000738.2(CHRM1);NM_000739.2(CHRM2);NM_000794.4(DRD…
path:hsa04514	Cell adhesion molecules (CAMs)	718	29768	891	39356	0.000217838	0.000983294	1.06539	NM_000074.2(CD40LG);NM_000201.2(ICAM1);NM_000210.3(ITGA6);NM_000211.4(ITGB2);NM_000425.4(L1CAM);NM_000442.4(PECAM1);NM_000450.2(SELE);NM_000530.7(MPZ);NM_000615.6(NCAM1);NM_000616.4(CD4);NM_000632.3(ITGAM);NM_000873.3(ICAM2);NM_000885.5(ITGA4);NM_000889.2(ITGB7);NM_001005388.2(NFASC);NM_001005389.1(NFASC);NM_001006946.1(SDC1);NM_001024736.1(CD276);NM_001025109.1(CD34);NM_001030288.3(SPN);NM_00104…
path:hsa04660	T cell receptor signaling pathway	500	29768	613	39356	0.000237978	0.00104591	1.07838	NM_000074.2(CD40LG);NM_000594.3(TNF);NM_000616.4(CD4);NM_000732.4(CD3D);NM_000733.3(CD3E);NM_000734.3(CD247);NM_000758.3(CSF2);NM_000944.4(PPP3CA);NM_000945.3(PPP3R1);NM_001004720.2(NCK2);NM_001004722.3(NCK2);NM_001014431.1(AKT1);NM_001014432.1(AKT1);NM_001014831.2(PAK4);NM_001014832.1(PAK4);NM_001014834.2(PAK4);NM_001014835.1(PAK4);NM_001014987.1(LAT);NM_001014988.1(LAT);NM_001014989.1(LAT);NM_0…
path:hsa04915	Estrogen signaling pathway	573	29768	706	39356	0.000238145	0.00104591	1.07303	NM_000125.3(ESR1);NM_000223.3(KRT12);NM_000224.2(KRT18);NM_000422.2(KRT17);NM_000516.5(GNAS);NM_000526.4(KRT14);NM_000603.4(NOS3);NM_000633.2(BCL2);NM_000657.2(BCL2);NM_000890.4(KCNJ5);NM_000914.4(OPRM1);NM_000926.4(PGR);NM_000932.2(PLCB3);NM_000933.3(PLCB4);NM_000964.3(RARA);NM_001008504.3(OPRM1);NM_001011666.2(CREB5);NM_001014431.1(AKT1);NM_001014432.1(AKT1);NM_001017963.2(HSP90AA1);NM_00102480…
path:hsa00062	Fatty acid elongation	131	29768	150	39356	0.000275175	0.00119243	1.15463	NM_000182.4(HADHA);NM_000183.2(HADHB);NM_000310.3(PPT1);NM_001010915.4(HACD4);NM_001024732.3(MECR);NM_001025780.2(ABHD17B);NM_001037161.1(ACOT1);NM_001104558.1(ELOVL7);NM_001130111.1(ABHD17A);NM_001130721.1(ELOVL6);NM_001142604.1(PPT1);NM_001184705.2(HADH);NM_001204103.1(PPT2);NM_001242828.1(ELOVL5);NM_001242830.1(ELOVL5);NM_001242831.1(ELOVL5);NM_001256399.1(ELOVL1);NM_001256401.1(ELOVL1);NM_001…
path:hsa04710	Circadian rhythm	198	29768	233	39356	0.000324261	0.00138664	1.12349	NM_001001523.1(RORC);NM_001030272.2(ARNTL);NM_001030273.2(ARNTL);NM_001040633.1(PRKAG2);NM_001127457.2(CRY2);NM_001178.5(ARNTL);NM_001206710.1(PRKAG1);NM_001256856.1(BTRC);NM_001267843.1(CLOCK);NM_001289861.1(PER3);NM_001289862.1(PER3);NM_001289863.1(PER3);NM_001289864.1(PER3);NM_001289912.1(LOC400927-CSNK1E);NM_001297719.1(ARNTL);NM_001297722.1(ARNTL);NM_001297724.1(ARNTL);NM_001304527.1(PRKAG2)…
path:hsa04922	Glucagon signaling pathway	616	29768	764	39356	0.000528076	0.00222889	1.06598	NM_000151.3(G6PC);NM_000160.4(GCGR);NM_000162.4(GCK);NM_000284.3(PDHA1);NM_000290.3(PGAM2);NM_000292.2(PHKA2);NM_000294.2(PHKG2);NM_000507.3(FBP1);NM_000516.5(GNAS);NM_000922.3(PDE3B);NM_000932.2(PLCB3);NM_000933.3(PLCB4);NM_000944.4(PPP3CA);NM_000945.3(PPP3R1);NM_001001928.2(PPARA);NM_001002021.2(PFKL);NM_001011666.2(CREB5);NM_001014431.1(AKT1);NM_001014432.1(AKT1);NM_001018073.2(PCK2);NM_001029…
path:hsa05030	Cocaine addiction	257	29768	308	39356	0.000565475	0.00235615	1.10317	NM_000240.3(MAOA);NM_000360.3(TH);NM_000516.5(GNAS);NM_000790.3(DDC);NM_000794.4(DRD1);NM_000795.3(DRD2);NM_000832.6(GRIN1);NM_000833.4(GRIN2A);NM_000834.4(GRIN2B);NM_000835.4(GRIN2C);NM_000836.2(GRIN2D);NM_000839.4(GRM2);NM_000840.2(GRM3);NM_000898.4(MAOB);NM_001011666.2(CREB5);NM_001044.4(SLC6A3);NM_001077488.3(GNAS);NM_001077489.3(GNAS);NM_001077490.2(GNAS);NM_001081955.2(RGS9);NM_001082971.1(…
path:hsa04722	Neurotrophin signaling pathway	764	29768	955	39356	0.000682687	0.00280852	1.05767	NM_000021.3(PSEN1);NM_000447.2(PSEN2);NM_000546.5(TP53);NM_000633.2(BCL2);NM_000639.2(FASLG);NM_000657.2(BCL2);NM_001005332.1(MAGED1);NM_001005333.1(MAGED1);NM_001006665.1(RPS6KA1);NM_001006932.2(RPS6KA2);NM_001007097.2(NTRK2);NM_001007156.2(NTRK3);NM_001007792.1(NTRK1);NM_001010935.2(RAP1A);NM_001010942.2(RAP1B);NM_001012331.1(NTRK1);NM_001012338.2(NTRK3);NM_001014431.1(AKT1);NM_001014432.1(AKT1…
path:hsa04014	Ras signaling pathway	1168	29768	1477	39356	0.00080111	0.00325451	1.0455	NM_000141.4(FGFR2);NM_000142.4(FGFR3);NM_000207.2(INS);NM_000208.3(INSR);NM_000222.2(KIT);NM_000245.3(MET);NM_000267.3(NF1);NM_000300.3(PLA2G2A);NM_000601.5(HGF);NM_000612.5(IGF2);NM_000618.4(IGF1);NM_000639.2(FASLG);NM_000757.5(CSF1);NM_000800.4(FGF1);NM_000832.6(GRIN1);NM_000833.4(GRIN2A);NM_000834.4(GRIN2B);NM_000872.4(HTR7);NM_000875.4(IGF1R);NM_000899.4(KITLG);NM_000928.2(PLA2G1B);NM_000929.…
path:hsa05225	Hepatocellular carcinoma	740	29768	925	39356	0.000820528	0.00329224	1.05767	NM_000038.5(APC);NM_000077.4(CDKN2A);NM_000107.2(DDB2);NM_000245.3(MET);NM_000314.6(PTEN);NM_000321.2(RB1);NM_000389.4(CDKN1A);NM_000546.5(TP53);NM_000601.5(HGF);NM_000612.5(IGF2);NM_000660.6(TGFB1);NM_000849.4(GSTM3);NM_000850.4(GSTM4);NM_000852.3(GSTP1);NM_000875.4(IGF1R);NM_000903.2(NQO1);NM_001003652.3(SMAD2);NM_001003801.1(SMARCD3);NM_001003802.1(SMARCD3);NM_001007139.5(IGF2);NM_001007468.2(…
path:hsa04392	Hippo signaling pathway - multiple species	192	29768	228	39356	0.00106874	0.00423587	1.11334	NM_000268.3(NF2);NM_001042481.2(FRMD6);NM_001080436.1(WTIP);NM_001122841.2(FRMD1);NM_001128620.1(PAK1);NM_001130145.2(YAP1);NM_001142552.1(DCHS2);NM_001161661.1(WWC1);NM_001161662.1(WWC1);NM_001168278.2(WWTR1);NM_001168280.2(WWTR1);NM_001195044.1(YAP1);NM_001195045.1(YAP1);NM_001206957.1(RASSF1);NM_001244766.1(MOB1B);NM_001244767.1(MOB1B);NM_001256658.1(TEAD2);NM_001256659.1(TEAD2);NM_001256660.1…
path:hsa04960	Aldosterone-regulated sodium reabsorption	163	29768	192	39356	0.00116316	0.00455455	1.1224	NM_000196.3(HSD11B2);NM_000207.2(INS);NM_000208.3(INSR);NM_000336.2(SCNN1B);NM_000618.4(IGF1);NM_000701.7(ATP1A1);NM_000702.3(ATP1A2);NM_000901.4(NR3C2);NM_001038.5(SCNN1A);NM_001039.3(SCNN1G);NM_001040056.2(MAPK3);NM_001079817.2(INSR);NM_001109891.1(MAPK3);NM_001111283.2(IGF1);NM_001111284.1(IGF1);NM_001114172.1(PIK3R3);NM_001130012.2(SLC9A3R2);NM_001142447.2(ATP1B4);NM_001143676.1(SGK1);NM_0011…
path:hsa04720	Long-term potentiation	453	29768	559	39356	0.00127395	0.00492896	1.07139	NM_000719.6(CACNA1C);NM_000827.3(GRIA1);NM_000832.6(GRIN1);NM_000833.4(GRIN2A);NM_000834.4(GRIN2B);NM_000835.4(GRIN2C);NM_000836.2(GRIN2D);NM_000932.2(PLCB3);NM_000933.3(PLCB4);NM_000944.4(PPP3CA);NM_000945.3(PPP3R1);NM_001006665.1(RPS6KA1);NM_001006932.2(RPS6KA2);NM_001008709.1(PPP1CA);NM_001010935.2(RAP1A);NM_001010942.2(RAP1B);NM_001031733.2(CALML4);NM_001040056.2(MAPK3);NM_001079846.1(CREBBP)…
path:hsa04919	Thyroid hormone signaling pathway	589	29768	734	39356	0.00158611	0.00606452	1.06091	NM_000125.3(ESR1);NM_000212.2(ITGB3);NM_000435.2(NOTCH3);NM_000546.5(TP53);NM_000548.4(TSC2);NM_000701.7(ATP1A1);NM_000702.3(ATP1A2);NM_000793.5(DIO2);NM_000932.2(PLCB3);NM_000933.3(PLCB4);NM_001007023.4(DIO2);NM_001014431.1(AKT1);NM_001014432.1(AKT1);NM_001018053.1(PFKFB2);NM_001040056.2(MAPK3);NM_001077183.2(TSC2);NM_001079518.1(MED24);NM_001079846.1(CREBBP);NM_001098209.1(CTNNB1);NM_001098210.…
path:hsa05230	Central carbon metabolism in cancer	398	29768	490	39356	0.00176445	0.00666799	1.07386	NM_000141.4(FGFR2);NM_000142.4(FGFR3);NM_000162.4(GCK);NM_000188.2(HK1);NM_000189.4(HK2);NM_000222.2(KIT);NM_000245.3(MET);NM_000284.3(PDHA1);NM_000289.5(PFKM);NM_000290.3(PGAM2);NM_000314.6(PTEN);NM_000402.4(G6PD);NM_000546.5(TP53);NM_001002021.2(PFKL);NM_001005862.2(ERBB2);NM_001007156.2(NTRK3);NM_001007792.1(NTRK1);NM_001012331.1(NTRK1);NM_001012338.2(NTRK3);NM_001014431.1(AKT1);NM_001014432.1…
path:hsa00561	Glycerolipid metabolism	351	29768	431	39356	0.00228218	0.00852539	1.07669	NM_000237.2(LPL);NM_000690.3(ALDH2);NM_000692.4(ALDH1B1);NM_000696.3(ALDH9A1);NM_001003794.2(MGLL);NM_001012727.1(AGPAT2);NM_001013742.3(DGKK);NM_001030059.2(PLPP4);NM_001037553.1(AGPAT3);NM_001080480.2(MBOAT1);NM_001080744.1(DGKG);NM_001080745.1(DGKG);NM_001105540.1(DGKZ);NM_001144951.1(GLYCTK);NM_001182.4(ALDH7A1);NM_001199266.1(DGKZ);NM_001199267.1(DGKZ);NM_001199268.1(DGKZ);NM_001201377.1(ALD…
path:hsa00360	Phenylalanine metabolism	52	29768	57	39356	0.00242768	0.00896587	1.20612	NM_000240.3(MAOA);NM_000277.2(PAH);NM_000691.4(ALDH3A1);NM_000693.3(ALDH1A3);NM_000694.3(ALDH3B1);NM_000790.3(DDC);NM_000898.4(MAOB);NM_001030010.2(ALDH3B1);NM_001031615.2(ALDH3B2);NM_001082971.1(DDC);NM_001135167.1(ALDH3A1);NM_001135168.1(ALDH3A1);NM_001158.4(AOC2);NM_001161473.2(ALDH3B1);NM_001171993.1(HPD);NM_001242886.1(DDC);NM_001242887.1(DDC);NM_001242888.1(DDC);NM_001242889.1(DDC);NM_00125…
path:hsa05213	Endometrial cancer	408	29768	504	39356	0.00248033	0.00905739	1.07026	NM_000038.5(APC);NM_000107.2(DDB2);NM_000314.6(PTEN);NM_000389.4(CDKN1A);NM_000546.5(TP53);NM_001005862.2(ERBB2);NM_001014431.1(AKT1);NM_001014432.1(AKT1);NM_001014794.2(ILK);NM_001014795.2(ILK);NM_001040056.2(MAPK3);NM_001098209.1(CTNNB1);NM_001098210.1(CTNNB1);NM_001109891.1(MAPK3);NM_001114123.2(ELK1);NM_001114172.1(PIK3R3);NM_001126112.2(TP53);NM_001126113.2(TP53);NM_001126114.2(TP53);NM_0011…
path:hsa00562	Inositol phosphate metabolism	501	29768	624	39356	0.00312186	0.0112734	1.06149	NM_000314.6(PTEN);NM_000932.2(PLCB3);NM_000933.3(PLCB4);NM_001002837.2(INPP5J);NM_001017915.2(INPP5D);NM_001077525.2(MTMR14);NM_001077526.2(MTMR14);NM_001101669.2(INPP4B);NM_001128928.1(INPP1);NM_001130960.1(PLCH1);NM_001130961.1(PLCH1);NM_001130964.1(PLCD1);NM_001134224.1(INPP4A);NM_001134225.1(INPP4A);NM_001135219.1(PIP5KL1);NM_001135636.1(PIP5K1A);NM_001135637.1(PIP5K1A);NM_001135638.1(PIP5K1A…
path:hsa04918	Thyroid hormone synthesis	345	29768	425	39356	0.00367054	0.0131091	1.07323	NM_000369.2(TSHR);NM_000441.1(SLC26A4);NM_000453.2(SLC5A5);NM_000516.5(GNAS);NM_000547.5(TPO);NM_000581.3(GPX1);NM_000637.4(GSR);NM_000701.7(ATP1A1);NM_000702.3(ATP1A2);NM_000932.2(PLCB3);NM_000933.3(PLCB4);NM_001011666.2(CREB5);NM_001077488.3(GNAS);NM_001077489.3(GNAS);NM_001077490.2(GNAS);NM_001099952.2(ITPR1);NM_001114.4(ADCY7);NM_001115.2(ADCY8);NM_001116.3(ADCY9);NM_001136153.1(ATF6B);NM_001…
path:hsa04012	ErbB signaling pathway	665	29768	836	39356	0.00387781	0.0136988	1.05166	NM_000389.4(CDKN1A);NM_001004720.2(NCK2);NM_001004722.3(NCK2);NM_001005862.2(ERBB2);NM_001010848.3(NRG3);NM_001014431.1(AKT1);NM_001014432.1(AKT1);NM_001014831.2(PAK4);NM_001014832.1(PAK4);NM_001014834.2(PAK4);NM_001014835.1(PAK4);NM_001040056.2(MAPK3);NM_001042599.1(ERBB4);NM_001099691.2(TGFA);NM_001109891.1(MAPK3);NM_001114123.2(ELK1);NM_001114172.1(PIK3R3);NM_001128166.2(PAK3);NM_001128167.2(P…
path:hsa04728	Dopaminergic synapse	781	29768	986	39356	0.00406643	0.0140733	1.04721	NM_000068.3(CACNA1A);NM_000240.3(MAOA);NM_000360.3(TH);NM_000516.5(GNAS);NM_000718.3(CACNA1B);NM_000719.6(CACNA1C);NM_000720.3(CACNA1D);NM_000754.3(COMT);NM_000790.3(DDC);NM_000794.4(DRD1);NM_000795.3(DRD2);NM_000796.5(DRD3);NM_000797.3(DRD4);NM_000798.4(DRD5);NM_000827.3(GRIA1);NM_000833.4(GRIN2A);NM_000834.4(GRIN2B);NM_000890.4(KCNJ5);NM_000898.4(MAOB);NM_000932.2(PLCB3);NM_000933.3(PLCB4);NM_0…
path:hsa04142	Lysosome	511	29768	638	39356	0.00407044	0.0140733	1.05892	NM_000046.4(ARSB);NM_000086.2(CLN3);NM_000152.4(GAA);NM_000157.3(GBA);NM_000199.4(SGSH);NM_000202.7(IDS);NM_000203.4(IDUA);NM_000262.2(NAGA);NM_000263.3(NAGLU);NM_000271.4(NPC1);NM_000308.3(CTSA);NM_000310.3(PPT1);NM_000391.3(TPP1);NM_000405.4(GM2A);NM_000434.3(NEU1);NM_000487.5(ARSA);NM_000512.4(GALNS);NM_000520.5(HEXA);NM_000521.3(HEXB);NM_000528.3(MAN2B1);NM_000543.4(SMPD1);NM_000578.3(SLC11A1…
path:hsa04066	HIF-1 signaling pathway	539	29768	675	39356	0.00505826	0.0173046	1.05571	NM_000034.3(ALDOA);NM_000188.2(HK1);NM_000189.4(HK2);NM_000207.2(INS);NM_000208.3(INSR);NM_000284.3(PDHA1);NM_000389.4(CDKN1A);NM_000551.3(VHL);NM_000565.3(IL6R);NM_000600.4(IL6);NM_000602.4(SERPINE1);NM_000603.4(NOS3);NM_000618.4(IGF1);NM_000625.4(NOS2);NM_000633.2(BCL2);NM_000657.2(BCL2);NM_000799.3(EPO);NM_000875.4(IGF1R);NM_001002021.2(PFKL);NM_001005862.2(ERBB2);NM_001014431.1(AKT1);NM_00101…
path:hsa04662	B cell receptor signaling pathway	299	29768	368	39356	0.00590473	0.01999	1.0742	NM_000626.3(CD79B);NM_000944.4(PPP3CA);NM_000945.3(PPP3R1);NM_001006658.2(CR2);NM_001014431.1(AKT1);NM_001014432.1(AKT1);NM_001017915.2(INPP5D);NM_001039933.2(CD79B);NM_001040056.2(MAPK3);NM_001079874.1(VAV3);NM_001081450.2(LILRB3);NM_001099856.4(IKBKG);NM_001099857.2(IKBKG);NM_001109891.1(MAPK3);NM_001111097.2(LYN);NM_001114094.1(BLNK);NM_001114172.1(PIK3R3);NM_001130442.2(HRAS);NM_001130691.1(P…
path:hsa00410	beta-Alanine metabolism	113	29768	133	39356	0.00600618	0.0201238	1.12328	NM_000016.5(ACADM);NM_000110.3(DPYD);NM_000182.4(HADHA);NM_000663.4(ABAT);NM_000690.3(ALDH2);NM_000691.4(ALDH3A1);NM_000692.4(ALDH1B1);NM_000693.3(ALDH1A3);NM_000694.3(ALDH3B1);NM_000696.3(ALDH9A1);NM_000817.2(GAD1);NM_000818.2(GAD2);NM_001030010.2(ALDH3B1);NM_001031615.2(ALDH3B2);NM_001127328.2(ACADM);NM_001127448.1(ABAT);NM_001134366.1(GAD2);NM_001135167.1(ALDH3A1);NM_001135168.1(ALDH3A1);NM_00…
path:hsa00740	Riboflavin metabolism	25	29768	26	39356	0.0065814	0.0218261	1.27124	NM_000713.2(BLVRB);NM_001111034.2(ACP5);NM_001111035.2(ACP5);NM_001111036.2(ACP5);NM_001184891.1(FLAD1);NM_001184892.1(FLAD1);NM_001302489.1(ACP2);NM_001302490.1(ACP2);NM_001302491.1(ACP2);NM_001302492.1(ACP2);NM_001322023.1(ACP5);NM_001357016.1(ACP2);NM_001610.3(ACP2);NM_001611.4(ACP5);NM_004300.3(ACP1);NM_005021.4(ENPP3);NM_006208.2(ENPP1);NM_007099.3(ACP1);NM_018339.5(RFK);NM_025207.4(FLAD1);N…
path:hsa04340	Hedgehog signaling pathway	251	29768	308	39356	0.00832591	0.0273325	1.07742	NM_000168.5(GLI3);NM_000193.3(SHH);NM_000264.4(PTCH1);NM_000633.2(BCL2);NM_000657.2(BCL2);NM_001001664.2(SPOPL);NM_001007226.1(SPOP);NM_001007227.1(SPOP);NM_001007228.1(SPOP);NM_001007229.1(SPOP);NM_001007230.1(SPOP);NM_001031812.3(CSNK1G3);NM_001083602.2(PTCH1);NM_001083603.2(PTCH1);NM_001083604.2(PTCH1);NM_001083605.2(PTCH1);NM_001083606.2(PTCH1);NM_001083607.2(PTCH1);NM_001146156.1(GSK3B);NM_0…
path:hsa04350	TGF-beta signaling pathway	323	29768	400	39356	0.00854464	0.0277701	1.06759	NM_000325.5(PITX2);NM_000479.4(AMH);NM_000557.4(GDF5);NM_000594.3(TNF);NM_000660.6(TGFB1);NM_001001419.2(SMAD5);NM_001001420.2(SMAD5);NM_001001557.3(GDF6);NM_001003652.3(SMAD2);NM_001003688.1(SMAD1);NM_001009552.1(PPP2CB);NM_001024847.2(TGFBR2);NM_001040056.2(MAPK3);NM_001079846.1(CREBBP);NM_001083588.1(E2F5);NM_001083589.1(E2F5);NM_001105.4(ACVR1);NM_001105251.3(ZFYVE16);NM_001106.3(ACVR2B);NM_0…
path:hsa03015	mRNA surveillance pathway	400	29768	499	39356	0.00917475	0.0295227	1.05979	NM_001006622.2(WDR33);NM_001006623.2(WDR33);NM_001008709.1(PPP1CA);NM_001009552.1(PPP2CB);NM_001012977.2(PABPC1L2A);NM_001033521.1(CSTF1);NM_001033522.1(CSTF1);NM_001042506.1(PABPC1L2B);NM_001080487.2(PABPN1L);NM_001081491.1(NXF1);NM_001081559.2(CPSF4);NM_001099686.2(NXF2B);NM_001114734.1(PABPC4L);NM_001124756.2(PABPC1L);NM_001130006.1(GSPT1);NM_001130007.1(GSPT1);NM_001134937.1(FIP1L1);NM_001134…
path:hsa04330	Notch signaling pathway	179	29768	217	39356	0.00953013	0.0303656	1.09057	NM_000021.3(PSEN1);NM_000214.2(JAG1);NM_000435.2(NOTCH3);NM_000447.2(PSEN2);NM_001005743.1(NUMB);NM_001005744.1(NUMB);NM_001005745.1(NUMB);NM_001010926.3(HES5);NM_001012614.1(CTBP1);NM_001040167.1(LFNG);NM_001040168.1(LFNG);NM_001077261.3(NCOR2);NM_001077628.2(APH1A);NM_001079846.1(CREBBP);NM_001102594.1(DTX2);NM_001102595.1(DTX2);NM_001102596.1(DTX2);NM_001145646.1(APH1B);NM_001166343.1(MFNG);NM…
path:hsa04910	Insulin signaling pathway	791	29768	1005	39356	0.0111521	0.0351888	1.04057	NM_000151.3(G6PC);NM_000162.4(GCK);NM_000188.2(HK1);NM_000189.4(HK2);NM_000207.2(INS);NM_000208.3(INSR);NM_000292.2(PHKA2);NM_000294.2(PHKG2);NM_000298.5(PKLR);NM_000368.4(TSC1);NM_000507.3(FBP1);NM_000548.4(TSC2);NM_000922.3(PDE3B);NM_001005291.2(SREBF1);NM_001008709.1(PPP1CA);NM_001013839.3(EXOC7);NM_001014431.1(AKT1);NM_001014432.1(AKT1);NM_001018073.2(PCK2);NM_001031733.2(CALML4);NM_001033581…
path:hsa04218	Cellular senescence	673	29768	854	39356	0.015175	0.0474217	1.04188	NM_000077.4(CDKN2A);NM_000314.6(PTEN);NM_000321.2(RB1);NM_000368.4(TSC1);NM_000389.4(CDKN1A);NM_000546.5(TP53);NM_000548.4(TSC2);NM_000598.4(IGFBP3);NM_000600.4(IL6);NM_000602.4(SERPINE1);NM_000660.6(TGFB1);NM_000720.3(CACNA1D);NM_000944.4(PPP3CA);NM_000945.3(PPP3R1);NM_001003652.3(SMAD2);NM_001008709.1(PPP1CA);NM_001013398.1(IGFBP3);NM_001014431.1(AKT1);NM_001014432.1(AKT1);NM_001024674.2(LIN52)…
path:hsa00533	Glycosaminoglycan biosynthesis - keratan sulfate	85	29768	100	39356	0.0158199	0.0489664	1.12378	NM_001005417.2(B4GALT2);NM_001166395.1(CHST4);NM_001199873.1(B4GALT3);NM_001199874.1(B4GALT3);NM_001270459.1(ST3GAL3);NM_001270460.1(ST3GAL3);NM_001270461.2(ST3GAL3);NM_001270462.2(ST3GAL3);NM_001270463.2(ST3GAL3);NM_001270464.2(ST3GAL3);NM_001270465.2(ST3GAL3);NM_001270466.2(ST3GAL3);NM_001350619.1(ST3GAL3);NM_001350620.1(ST3GAL3);NM_001350621.1(ST3GAL3);NM_001497.3(B4GALT1);NM_003033.3(ST3GAL1)…
path:hsa04150	mTOR signaling pathway	696	29768	885	39356	0.0182917	0.0560831	1.03975	NM_000207.2(INS);NM_000208.3(INSR);NM_000314.6(PTEN);NM_000368.4(TSC1);NM_000455.4(STK11);NM_000548.4(TSC2);NM_000594.3(TNF);NM_000618.4(IGF1);NM_000875.4(IGF1R);NM_001001549.2(GRB10);NM_001001550.2(GRB10);NM_001001555.2(GRB10);NM_001003786.2(STRADA);NM_001003787.2(STRADA);NM_001003788.2(STRADA);NM_001006617.1(MAPKAP1);NM_001006618.1(MAPKAP1);NM_001006619.1(MAPKAP1);NM_001006620.1(MAPKAP1);NM_001…
path:hsa04726	Serotonergic synapse	451	29768	568	39356	0.0185616	0.0563786	1.04976	NM_000068.3(CACNA1A);NM_000069.2(CACNA1S);NM_000106.5(CYP2D6);NM_000240.3(MAOA);NM_000484.3(APP);NM_000516.5(GNAS);NM_000524.3(HTR1A);NM_000697.2(ALOX12);NM_000698.4(ALOX5);NM_000718.3(CACNA1B);NM_000719.6(CACNA1C);NM_000720.3(CACNA1D);NM_000769.3(CYP2C19);NM_000770.3(CYP2C8);NM_000772.2(CYP2C18);NM_000775.3(CYP2J2);NM_000790.3(DDC);NM_000814.5(GABRB3);NM_000863.2(HTR1B);NM_000864.4(HTR1D);NM_000…
path:hsa00920	Sulfur metabolism	41	29768	46	39356	0.0188103	0.0566049	1.17839	NM_000456.2(SUOX);NM_001013436.2(MPST);NM_001015880.1(PAPSS2);NM_001032386.1(SUOX);NM_001032387.1(SUOX);NM_001130517.2(MPST);NM_001271213.1(SQOR);NM_001286149.1(BPNT1);NM_001286150.1(BPNT1);NM_001286151.1(BPNT1);NM_001320867.1(ETHE1);NM_004670.3(PAPSS2);NM_005443.4(PAPSS1);NM_006085.5(BPNT1);NM_014297.4(ETHE1);NM_017813.4(IMPAD1);NM_021126.5(MPST);NM_021199.3(SQOR);XM_005258687.4(ETHE1);XM_005261…
path:hsa05223	Non-small cell lung cancer	308	29768	384	39356	0.0191256	0.0570259	1.06043	NM_000077.4(CDKN2A);NM_000107.2(DDB2);NM_000215.3(JAK3);NM_000321.2(RB1);NM_000389.4(CDKN1A);NM_000546.5(TP53);NM_001005862.2(ERBB2);NM_001014431.1(AKT1);NM_001014432.1(AKT1);NM_001040056.2(MAPK3);NM_001099691.2(TGFA);NM_001109891.1(MAPK3);NM_001114172.1(PIK3R3);NM_001126112.2(TP53);NM_001126113.2(TP53);NM_001126114.2(TP53);NM_001126115.1(TP53);NM_001126116.1(TP53);NM_001126117.1(TP53);NM_0011261…
path:hsa04630	Jak-STAT signaling pathway	685	29768	872	39356	0.0222046	0.0656044	1.03857	NM_000121.3(EPOR);NM_000163.4(GHR);NM_000206.2(IL2RG);NM_000215.3(JAK3);NM_000389.4(CDKN1A);NM_000395.2(CSF2RB);NM_000418.3(IL4R);NM_000460.3(THPO);NM_000515.4(GH1);NM_000564.4(IL5RA);NM_000565.3(IL6R);NM_000585.4(IL15);NM_000588.3(IL3);NM_000600.4(IL6);NM_000605.3(IFNA2);NM_000628.4(IL10RB);NM_000629.2(IFNAR1);NM_000633.2(BCL2);NM_000641.3(IL11);NM_000657.2(BCL2);NM_000758.3(CSF2);NM_000759.3(CS…
path:hsa04310	Wnt signaling pathway	745	29768	950	39356	0.0225188	0.0659334	1.0368	NM_000021.3(PSEN1);NM_000038.5(APC);NM_000546.5(TP53);NM_000932.2(PLCB3);NM_000933.3(PLCB4);NM_000944.4(PPP3CA);NM_000945.3(PPP3R1);NM_001006610.1(SIAH1);NM_001012329.1(CTNNBIP1);NM_001012614.1(CTBP1);NM_001079846.1(CREBBP);NM_001098209.1(CTNNB1);NM_001098210.1(CTNNB1);NM_001126112.2(TP53);NM_001126113.2(TP53);NM_001126114.2(TP53);NM_001126115.1(TP53);NM_001126116.1(TP53);NM_001126117.1(TP53);NM_…
path:hsa05418	Fluid shear stress and atherosclerosis	714	29768	910	39356	0.0233923	0.0678794	1.03733	NM_000050.4(ASS1);NM_000201.2(ICAM1);NM_000212.2(ITGB3);NM_000265.5(NCF1);NM_000361.2(THBD);NM_000419.4(ITGA2B);NM_000433.3(NCF2);NM_000442.4(PECAM1);NM_000450.2(SELE);NM_000546.5(TP53);NM_000594.3(TNF);NM_000603.4(NOS3);NM_000633.2(BCL2);NM_000657.2(BCL2);NM_000849.4(GSTM3);NM_000850.4(GSTM4);NM_000852.3(GSTP1);NM_000877.3(IL1R1);NM_000903.2(NQO1);NM_000930.4(PLAT);NM_001006946.1(SDC1);NM_001014…
path:hsa00591	Linoleic acid metabolism	105	29768	126	39356	0.0245195	0.0704725	1.10174	NM_000300.3(PLA2G2A);NM_000761.4(CYP1A2);NM_000769.3(CYP2C19);NM_000770.3(CYP2C8);NM_000773.3(CYP2E1);NM_000775.3(CYP2J2);NM_000928.2(PLA2G1B);NM_000929.2(PLA2G5);NM_001004426.2(PLA2G6);NM_001114633.1(PLA2G4B);NM_001128203.1(PLA2G16);NM_001140.4(ALOX15);NM_001159322.1(PLA2G4C);NM_001159323.1(PLA2G4C);NM_001161727.1(PLA2G2A);NM_001161728.1(PLA2G2A);NM_001161729.1(PLA2G2A);NM_001170585.1(PLB1);NM_0…
path:hsa04260	Cardiac muscle contraction	339	29768	425	39356	0.0247196	0.0704725	1.05456	NM_000069.2(CACNA1S);NM_000258.2(MYL3);NM_000363.4(TNNI3);NM_000364.3(TNNT2);NM_000366.5(TPM1);NM_000432.3(MYL2);NM_000701.7(ATP1A1);NM_000702.3(ATP1A2);NM_000719.6(CACNA1C);NM_000720.3(CACNA1D);NM_000722.3(CACNA2D1);NM_000723.4(CACNB1);NM_000724.3(CACNB2);NM_000725.3(CACNB3);NM_000726.4(CACNB4);NM_000727.3(CACNG1);NM_001001430.2(TNNT2);NM_001001431.2(TNNT2);NM_001001432.2(TNNT2);NM_001002841.1(M…
path:hsa00590	Arachidonic acid metabolism	217	29768	269	39356	0.0293115	0.0828369	1.06652	NM_000300.3(PLA2G2A);NM_000581.3(GPX1);NM_000697.2(ALOX12);NM_000698.4(ALOX5);NM_000767.4(CYP2B6);NM_000769.3(CYP2C19);NM_000770.3(CYP2C8);NM_000773.3(CYP2E1);NM_000775.3(CYP2J2);NM_000895.2(LTA4H);NM_000896.2(CYP4F3);NM_000928.2(PLA2G1B);NM_000929.2(PLA2G5);NM_000954.5(PTGDS);NM_000961.3(PTGIS);NM_000962.3(PTGS1);NM_000963.3(PTGS2);NM_001004426.2(PLA2G6);NM_001039130.1(ALOX15B);NM_001039131.1(AL…
path:hsa04912	GnRH signaling pathway	584	29768	744	39356	0.0354327	0.0992725	1.03777	NM_000069.2(CACNA1S);NM_000406.2(GNRHR);NM_000516.5(GNAS);NM_000719.6(CACNA1C);NM_000720.3(CACNA1D);NM_000825.3(GNRH1);NM_000932.2(PLCB3);NM_000933.3(PLCB4);NM_001012763.1(GNRHR);NM_001031733.2(CALML4);NM_001039802.1(CDC42);NM_001040056.2(MAPK3);NM_001077488.3(GNAS);NM_001077489.3(GNAS);NM_001077490.2(GNAS);NM_001083111.1(GNRH1);NM_001099952.2(ITPR1);NM_001109891.1(MAPK3);NM_001114.4(ADCY7);NM_00…
path:hsa05226	Gastric cancer	674	29768	862	39356	0.0410256	0.11396	1.03375	NM_000038.5(APC);NM_000107.2(DDB2);NM_000141.4(FGFR2);NM_000193.3(SHH);NM_000245.3(MET);NM_000321.2(RB1);NM_000389.4(CDKN1A);NM_000546.5(TP53);NM_000601.5(HGF);NM_000633.2(BCL2);NM_000657.2(BCL2);NM_000660.6(TGFB1);NM_000800.4(FGF1);NM_000927.4(ABCB1);NM_001003652.3(SMAD2);NM_001005862.2(ERBB2);NM_001010931.2(HGF);NM_001010932.2(HGF);NM_001010933.2(HGF);NM_001010934.2(HGF);NM_001014431.1(AKT1);NM…
path:hsa01523	Antifolate resistance	161	29768	199	39356	0.0464711	0.127992	1.06963	NM_000594.3(TNF);NM_000600.4(IL6);NM_000697.2(ALOX12);NM_000791.3(DHFR);NM_000802.3(FOLR1);NM_000804.3(FOLR3);NM_001018078.2(FPGS);NM_001071.2(TYMS);NM_001099856.4(IKBKG);NM_001099857.2(IKBKG);NM_001105515.2(ABCC4);NM_001144070.1(ABCC3);NM_001145138.1(RELA);NM_001145255.2(IKBKG);NM_001165412.1(NFKB1);NM_001166356.1(SHMT2);NM_001166357.1(SHMT2);NM_001166358.1(SHMT2);NM_001166359.1(SHMT2);NM_001190…
path:hsa05220	Chronic myeloid leukemia	345	29768	436	39356	0.0475566	0.1298	1.04615	NM_000077.4(CDKN2A);NM_000107.2(DDB2);NM_000321.2(RB1);NM_000389.4(CDKN1A);NM_000546.5(TP53);NM_000660.6(TGFB1);NM_001001890.2(RUNX1);NM_001012614.1(CTBP1);NM_001014431.1(AKT1);NM_001014432.1(AKT1);NM_001024847.2(TGFBR2);NM_001040056.2(MAPK3);NM_001099856.4(IKBKG);NM_001099857.2(IKBKG);NM_001109891.1(MAPK3);NM_001114172.1(PIK3R3);NM_001122607.1(RUNX1);NM_001126112.2(TP53);NM_001126113.2(TP53);NM_…
path:hsa00450	Selenocompound metabolism	72	29768	86	39356	0.0479262	0.1298	1.10687	NM_000254.2(MTR);NM_001008661.2(KYAT3);NM_001008662.2(KYAT3);NM_001015880.1(PAPSS2);NM_001093771.2(TXNRD1);NM_001122671.1(KYAT1);NM_001122672.1(KYAT1);NM_001173513.1(TXNRD3);NM_001190463.1(CTH);NM_001195602.1(SEPHS1);NM_001195604.1(SEPHS1);NM_001199219.1(INMT);NM_001282512.2(TXNRD2);NM_001287390.2(KYAT1);NM_001291939.1(MTR);NM_001291940.1(MTR);NM_001349447.1(KYAT3);NM_001349448.1(KYAT3);NM_001352…
path:hsa05146	Amoebiasis	500	29768	637	39356	0.048451	0.130137	1.03775	NM_000088.3(COL1A1);NM_000089.3(COL1A2);NM_000090.3(COL3A1);NM_000091.4(COL4A3);NM_000092.4(COL4A4);NM_000211.4(ITGB2);NM_000227.4(LAMA3);NM_000228.2(LAMB3);NM_000426.3(LAMA2);NM_000495.4(COL4A5);NM_000516.5(GNAS);NM_000591.3(CD14);NM_000594.3(TNF);NM_000600.4(IL6);NM_000606.2(C8G);NM_000625.4(NOS2);NM_000632.3(ITGAM);NM_000660.6(TGFB1);NM_000758.3(CSF2);NM_000877.3(IL1R1);NM_000932.2(PLCB3);NM_0…
